# Supplementary material
Source: publisher site journal article supplement (https://www.dovepress.com/get_supplementary_file.php?f=495512.xlsx)
Supplement: Supplementary file 1 [file get_supplementary_file.php]

## Sheet: Table S1
Table S1 The information of 45 genes which exhibited increased expression in the LPS group and decreased expression in the UMI-77 group
gene_id	gene_name	FPKM.Control	FPKM.Control	FPKM.Control	FPKM.Control	FPKM.LPS	FPKM.LPS	FPKM.LPS	FPKM.LPS	FPKM.UMI-77	FPKM.UMI-77	FPKM.UMI-77	FPKM.UMI-77
ENSMUSG00000006457	Actn3	0.210163	0.348345	0.214519	0.250028	0.568983	11.9386	0.452963	0.589797	0.296856	0.170703	0.185733	0.0795114
ENSMUSG00000005553	Atp4a	0	0	0	0	10.307	9.81349	9.56508	10.2814	0	0	0	0
ENSMUSG00000031449	Atp4b	0.0691968	0	0	0	1.16181	1.27748	1.04885	1.35087	0.035965	0	0	0
ENSMUSG00000020722	Cacng1	0.090744	0.07799	0.039089	0	0.299296	2.35333	0.258863	0.765835	0.080465	0.219774	0.07573	0.086437
ENSMUSG00000021194	Chga	0.0659166	0.377335	0.202434	0.197464	0.550667	0.621049	0.657645	0.612681	0.130306	0	0.0366432	0.159601
ENSMUSG00000024225	Clps	0	0.05065	0	0	19.5556	20.2545	20.1469	21.8927	0.054463	0	0	0
ENSMUSG00000026011	Ctla4	0.736962	0.638422	1.20362	1.12961	3.85151	5.80125	9.39522	5.23865	2.93508	2.40596	2.70959	3.53224
ENSMUSG00000069372	Ctxn3	0.0752902	0.332832	0.320471	0.286632	0.220417	3.35475	0.24217	0.336698	0.100327	0.156207	0.17268	0.119132
ENSMUSG00000034855	Cxcl10	4.49219	1.15973	2.63203	3.9106	109.879	69.8316	183.523	96.0985	33.0669	29.0917	32.1417	41.9401
ENSMUSG00000060183	Cxcl11	0.047723	0.065949	0.215714	0.125637	12.2319	7.11748	18.4793	7.43785	3.12714	2.16388	2.31828	3.21799
ENSMUSG00000029417	Cxcl9	2.20656	2.75894	3.87468	1.88086	220.256	206.396	205.1	151.002	72.5531	89.1755	102.973	94.6481
ENSMUSG00000064177	Ghrl	0.263529	0.26826	0.495879	0.265432	4.42633	5.20133	5.6637	5.09746	0.394846	0.18691	0.478533	0.370474
ENSMUSG00000068348	Gm10238	0	0	0	0	0	10.9132	0	0	0	0	0	0
ENSMUSG00000066475	Gm10268	1.12037	1.4133	2.02536	1.48796	3.66653	4.48	3.1841	4.57298	1.60533	1.49743	1.07786	2.00446
ENSMUSG00000082455	Gm13665	0.289987	0.263751	0.549811	0.471767	1.42523	1.18717	2.06621	2.07252	0.34452	0.271305	0.145699	0.65765
ENSMUSG00000082920	Gm13864	1.33228	1.93957	1.88521	1.54643	3.32375	2.97504	3.55472	4.47805	2.48179	1.63266	1.24754	1.69677
ENSMUSG00000082066	Gm13904	0.106827	0.036974	0.040804	0.126525	0.527849	0.667952	0.303751	0.637782	0.079248	0.075012	0.109059	0.115775
ENSMUSG00000084328	Gm14046	1.16374	1.64212	2.09409	1.24179	4.15399	3.39094	3.51962	4.12312	1.78529	1.65891	2.08442	1.68504
ENSMUSG00000080989	Gm14048	0	0	0	0	1.2272	0	0	0	0	0	0	0
ENSMUSG00000082258	Gm15289	0	0.503068	0.979798	0.390359	2.10728	2.44621	4.00391	3.73711	0.136381	0.523415	0.37834	0.581061
ENSMUSG00000074398	Gm15441	0.355169	0.674796	0.671888	0.614977	1.34042	1.32331	1.46488	1.3324	1.03405	0.57234	0.353606	0.385751
ENSMUSG00000091228	Gm20390	0	0	0	0	0	0	1.5549	0	0	0	0	0
ENSMUSG00000096764	Gm21985	0	0	0	0	0	0	0	0.715244	0	0	0	0
ENSMUSG00000098232	Gm3671	0.31393	0.535756	0.402624	0.353955	0.931722	1.2631	0.703979	0.859217	0.447132	0.373029	0.362143	0.449704
ENSMUSG00000104467	Gm37660	0.781749	0.672855	0.521953	0.701744	1.68687	1.47846	2.81677	3.17011	1.10481	1.04816	0.770758	1.50224
ENSMUSG00000108368	Gm45053	0.28107	0.195027	0.224657	0.087379	1.64043	1.11765	1.83644	1.74383	1.03021	0.940897	0.562672	0.530738
ENSMUSG00000112677	Gm48868	0.065037	0	0	0	1.30037	0.565681	0.98979	1.37589	0.477042	0.325623	0.515311	0.432133
ENSMUSG00000110109	Gm5599	0.270231	0.257578	0.444249	0.318789	1.12852	1.62846	0.921427	1.38402	0.613298	0.554949	0.560857	0.360441
ENSMUSG00000087239	Gm7613	0.310584	0.126665	0.401949	0.196455	0.774698	0.716952	0.66435	0.833053	0.307258	0.130682	0.124252	0.065882
ENSMUSG00000113340	Gm7695	0.33845	0.917948	1.01877	0.821745	1.87575	2.93374	2.3143	2.58012	1.0456	0.496765	1.58258	0.77313
ENSMUSG00000100215	Gm8292	1.09313	2.70478	2.19201	2.08401	3.29641	4.70297	3.79747	5.19344	2.71315	1.57069	1.93692	1.90127
ENSMUSG00000098222	Gm8318	0.095448	0.23427	0.18374	0.157123	0.574587	0.507829	0.519358	0.771141	0.231941	0.145969	0.219168	0.144939
ENSMUSG00000081797	Gm8662	0.174319	0.215295	0.087253	0.498552	0.938005	0.870481	0.528871	1.11144	0.147074	0.222497	0.33059	0.225096
ENSMUSG00000057370	Gm8724	0.34275	0.63814	0.632594	0.58763	1.75118	2.22526	2.51873	1.91231	0.753698	0.627103	0.398184	0.730704
ENSMUSG00000087541	Hopxos	2.6232	2.03098	1.35198	1.26068	4.12479	4.16753	4.59713	4.75811	2.55703	1.48544	2.68913	2.00197
ENSMUSG00000031551	Ido1	0.499053	0.20155	0.432054	0.444963	12.8177	9.4025	14.152	11.5045	4.7992	6.14273	7.48235	4.88265
ENSMUSG00000045932	Ifit2	7.66861	6.71955	8.01967	5.83764	51.2224	37.266	53.6347	29.9195	14.8788	14.9715	16.1552	25.8942
ENSMUSG00000043165	Lor	0.780129	1.29124	1.24786	0.394902	1.75281	1.69424	2.06933	2.80898	0.942426	1.07262	1.06	0.921499
ENSMUSG00000024786	Majin	0.334957	0.223771	0.216224	0.256581	4.42273	3.65398	3.16061	4.69783	1.97102	1.74522	1.67199	1.66309
ENSMUSG00000000386	Mx1	0.88526	1.21435	1.70787	0.614531	11.4807	14.0082	15.2805	8.91467	6.68418	4.18899	5.395	8.47667
ENSMUSG00000023987	Pgc	0	0	0	0.088887	3.99851	4.03731	3.02081	3.30242	0	0.040448	0	0
ENSMUSG00000082481	Rps12-ps19	0.944073	2.01959	2.51763	1.47333	4.61399	5.04354	4.441	6.00296	2.57561	1.62695	2.65328	1.57686
ENSMUSG00000004366	Sst	0	0	0	0	1.41063	1.17112	1.55238	1.55533	0.092308	0	0.085358	0.082385
ENSMUSG00000057596	Trim30d	0.269475	0.274128	0.225739	0.178957	4.16152	6.80831	4.98687	3.31546	2.43124	2.22233	2.92425	1.98416
ENSMUSG00000035186	Ubd	0.232372	0.468043	1.11579	0.894899	24.4842	34.044	18.1066	24.1794	13.9473	9.63243	8.85645	15.4774

## Sheet: Table S2
Table S2 The information of 79 genes which exhibited decreased expression in the LPS group and increased expression in the UMI-77 group
gene_id	gene_name	FPKM.Control	FPKM.Control	FPKM.Control	FPKM.Control	FPKM.LPS	FPKM.LPS	FPKM.LPS	FPKM.LPS	FPKM.UMI-77	FPKM.UMI-77	FPKM.UMI-77	FPKM.UMI-77
ENSMUSG00000055782	Abcd2	2.6714	3.66351	4.05593	1.89335	1.25332	1.57764	1.45188	1.7434	3.42189	3.20738	3.10094	3.78124
ENSMUSG00000054555	Adam12	0.479856	0.62364	0.72729	0.41516	0.0939816	0.120883	0.0961947	0.118287	0.377767	0.270475	0.259026	0.398616
ENSMUSG00000105987	AI506816	1.95748	2.00157	1.82085	1.83908	0.47828	0.447839	0.340615	0.421071	2.09187	2.06301	1.95546	1.91873
ENSMUSG00000032257	Ankk1	0.314241	0.341769	0.262726	0.383591	0	0.0215868	0	0	0.386519	0.358788	0.249955	0.312754
ENSMUSG00000037010	Apln	17.5183	12.5539	17.203	14.1962	4.18658	1.8123	1.92275	2.32282	7.18105	5.94307	10.9612	9.63785
ENSMUSG00000046532	Ar	1.02406	0.930356	0.864345	0.626671	0.141451	0.134638	0.122901	0.106842	0.317399	0.220916	0.220292	0.311028
ENSMUSG00000040187	Arntl2	0.195522	0.347439	0.263913	0.328104	0.0939128	0.112198	0.102754	0.103444	0.312143	0.227802	0.174079	0.255299
ENSMUSG00000048040	Arxes2	10.0527	15.283	16.2804	11.6693	1.17418	0.818239	1.23844	0.831624	4.06709	1.59095	1.38757	5.36077
ENSMUSG00000020774	Aspa	0.784896	1.41123	1.06403	0.995999	0.107067	0.373912	0.0755982	0.116472	0.515314	0.374367	0.494798	0.848326
ENSMUSG00000038295	Atg9b	0.968484	1.01503	0.961583	0.544784	0.130354	0.0423722	0.0799208	0.0541751	0.775851	0.506633	0.575477	0.64286
ENSMUSG00000041372	B4galnt3	0.0618084	0.159386	0.0521027	0.119312	0.00616012	0.0168397	0	0.0227431	0.153008	0.103315	0.0970031	0.112036
ENSMUSG00000030666	Calcb	15.3379	15.6303	17.6776	13.8743	1.13603	1.19396	0.666457	1.10426	14.6039	13.819	14.3538	13.803
ENSMUSG00000044303	Cdkn2a	1.0129	1.11451	1.45137	1.25358	0.288873	0.658327	0.448219	0.597505	1.63347	1.19849	1.23719	1.56209
ENSMUSG00000047501	Cldn4	6.47673	9.46438	8.72252	9.40881	3.14826	2.2631	4.97897	4.47639	9.93042	8.18834	8.10232	10.8073
ENSMUSG00000025064	Col17a1	3.12074	3.49152	2.8206	3.06234	0.0450126	0.0803615	0.175075	0.100805	2.35113	2.13662	2.3656	2.38217
ENSMUSG00000029154	Cwh43	0.866381	0.989605	0.973788	0.90949	0	0	0	0	0.725475	0.760323	0.787898	0.84614
ENSMUSG00000028194	Ddah1	8.19392	5.73145	6.40307	7.42904	3.83526	2.20939	2.15929	2.99385	5.04478	4.89744	5.41246	7.40144
ENSMUSG00000056632	Dsg3	0.190318	0.256302	0.311302	0.24029	0.0128148	0.0254311	0.02218	0.0139418	0.305526	0.168313	0.203147	0.213805
ENSMUSG00000024512	Dynap	3.53578	4.53881	3.76052	3.10639	0.06566	0.10355	0	0	3.49424	3.26805	3.42362	3.82457
ENSMUSG00000019883	Echdc1	4.2035	4.89598	4.72248	3.56788	1.48791	1.61673	2.266	1.22332	3.83632	2.93934	3.4353	3.71836
ENSMUSG00000032262	Elovl4	0.488793	0.613961	0.491455	0.507426	0.0869784	0.094355	0.0882806	0.278332	0.597307	0.406757	0.465389	0.65373
ENSMUSG00000027356	Fermt1	0.573894	0.608877	0.508745	0.754312	0.145342	0.136733	0.17484	0.15268	0.51717	0.485683	0.469248	0.435705
ENSMUSG00000087067	Gm11532	0.144784	0.019807	1.28246	1.01553	0	0	0	0	0	0.625189	0	0
ENSMUSG00000118219	Gm29695	0.119816	0.161698	0.145069	0.130836	0.01303	0.02366	0	0.008734	0.16195	0.158288	0.135879	0.29665
ENSMUSG00000107768	Gm44275	0.235111	0.218828	0.30013	0.126648	0	0	0	0	0.297632	0.119009	0.101252	0.076594
ENSMUSG00000116132	Gm49428	0.193983	0.298733	0.276954	0.227779	0	0	0	0	0.136608	0.379804	0.178814	0.109456
ENSMUSG00000000544	Gpa33	0.127331	0.0656725	0.506161	0.376507	0	0	0.0568443	0	0.284259	0.185369	0.169616	0.280828
ENSMUSG00000051431	Gpr87	0.289297	0.372129	0.295562	0.13847	0.0438846	0.0163741	0	0	0.290978	0.466085	0.487469	0.249063
ENSMUSG00000025068	Gsto1	36.1255	55.9796	37.143	47.6709	13.8908	15.0581	21.0904	14.4931	34.6147	30.5444	30.6077	50.2582
ENSMUSG00000056758	Hmga2	0.704562	0.589814	0.651153	0.6678	0.217367	0.0727026	0.0201212	0.0486901	0.679242	0.72748	0.59346	0.698772
ENSMUSG00000020875	Hoxb9	0.051988	0.048091	0.066075	0.108362	0	0	0.01809	0	0.187414	0.120046	0.061539	0.164654
ENSMUSG00000026420	Il24	0.295207	0.127225	0.208707	0.250748	0	0.0437579	0	0	0.176606	0.178571	0.182382	0.216944
ENSMUSG00000024957	Kcnk4	0.0569673	0.091964	0	0.0303042	0	0	0.00264379	0	0.055362	0.01291	0.0328401	0.0348125
ENSMUSG00000079852	Klra4	0.323592	0.342824	0.605347	0.215307	0	0	0	0	0.090949	0.076936	0.26292	0.380989
ENSMUSG00000029414	Kntc1	0.255354	0.42619	0.332236	0.383697	0.119955	0.160611	0.068323	0.206093	0.447482	0.465745	0.447812	0.413995
ENSMUSG00000020912	Krt12	0.372387	0.308512	0.547975	0.497476	0	0	0	0	0.589928	0.430661	0.478277	0.615095
ENSMUSG00000045545	Krt14	13.0317	14.9026	15.5127	11.9208	0.687867	0.920285	0.523762	0.57493	15.7606	14.6449	14.1993	15.0517
ENSMUSG00000035557	Krt17	20.3048	23.5647	23.1027	18.7569	0.085144	0.079583	0	0	22.2136	20.4304	21.0642	21.31
ENSMUSG00000059668	Krt4	8.80496	12.1883	9.99098	7.80966	1.93646	2.14292	1.51467	1.70324	9.31291	9.66363	8.17017	9.34468
ENSMUSG00000061527	Krt5	4.12102	8.8974	4.25434	4.4158	0.401669	0.331845	0.41592	0.296085	3.54175	3.96782	4.43349	4.328
ENSMUSG00000058354	Krt6a	12.7772	13.0347	14.3125	11.3539	0.0602859	0.0832836	0.143929	0.0972549	13.4844	12.7152	12.0298	12.3552
ENSMUSG00000023041	Krt6b	1.24329	1.07466	1.12234	0.555157	0.173599	0.170554	0.325025	0.085027	0.886911	0.940935	0.920428	1.01062
ENSMUSG00000047253	Krtap1-5	0.157957	0.089184	0.262463	0.162319	0	0	0	0	0.10684	0.052079	0.138871	0.172847
ENSMUSG00000041782	Lad1	2.19016	3.55366	1.77078	2.20809	0.655142	0.474272	1.07432	0.856868	2.19785	1.47613	1.94072	2.75674
ENSMUSG00000063804	Lin28b	0.0314697	0.0271733	0.0222008	0.015796	0	0	0.00718618	0	0.0373498	0.0312976	0.0330341	0.0174098
ENSMUSG00000036109	Mbnl3	0.407108	0.383204	0.436853	0.434182	0.223642	0.192765	0.163324	0.150257	0.361965	0.319771	0.344635	0.443567
ENSMUSG00000028927	Padi2	0.610769	1.07677	1.23496	1.05087	0.348348	0.321753	0.190829	0.421157	0.837875	0.873936	0.951056	0.891496
ENSMUSG00000047104	Pbp2	0.258872	0.298797	0.513985	0.150607	0	0	0	0	0.319374	0.363395	0.407552	0.02373
ENSMUSG00000102742	Pcdhga11	0.58294	0.645346	0.494085	0.213986	0.13341	0.093852	0.19493	0.025907	0.316496	0.428317	0.325829	0.398831
ENSMUSG00000020808	Pimreg	0.543243	0.994957	0.8158	0.835056	0.283871	0.480721	0.221719	0.509768	0.84945	0.928818	0.93004	0.754255
ENSMUSG00000021506	Pitx1	0.598415	0.897481	0.899857	0.503174	0.176681	0.0763031	0.253667	0.0718053	0.628634	0.739538	0.521902	0.867527
ENSMUSG00000026413	Pkp1	1.32757	1.38025	1.2625	1.10222	0.115464	0.249426	0.133976	0.043784	1.26831	1.15988	1.26172	1.3409
ENSMUSG00000098488	Pla2g4b	0.182513	0.894724	0.405636	0.197683	0.0522953	0.101221	0.0202945	0.0652498	0.4615	0.261832	0.137473	0.126989
ENSMUSG00000035818	Plekhs1	0.829122	0.828439	0.855132	0.886218	0.17787	0.131909	0.28772	0.456984	1.02969	0.942986	0.739389	1.23798
ENSMUSG00000029372	Ppbp	104.732	105.519	114.396	100.65	12.4577	14.7119	22.0224	16.385	108.274	99.3518	102.975	113.175
ENSMUSG00000048776	Pthlh	1.61915	2.30686	1.8684	1.52882	0.147762	0.513103	0.188497	0.394296	0.875684	1.09855	1.53966	2.06423
ENSMUSG00000032549	Rab6b	1.80838	1.84793	2.08475	1.59356	0.299527	0.282146	0.203225	0.345952	0.726693	0.555623	0.401672	0.79549
ENSMUSG00000002459	Rgs20	0.0427607	0	0.024333	0.0400628	0	0	0	0	0.0664896	0.0450403	0.0651374	0.111488
ENSMUSG00000042306	S100a14	6.92715	11.9418	11.8994	10.4127	3.49527	3.04944	2.98411	5.31826	7.47668	8.53774	8.42533	7.92988
ENSMUSG00000063767	S100a7a	1.18472	1.00771	1.4214	1.08042	0.0858613	0.202075	0.131767	0.139983	1.0411	0.466539	0.814086	0.513867
ENSMUSG00000058656	Samd12	1.90481	1.37205	2.02814	1.35162	0.0962788	0.122016	0.0872967	0.12058	0.401584	0.494102	0.31491	0.371689
ENSMUSG00000092572	Serpinb10	1.07134	0.863607	1.92327	0.690051	0.276035	0.421411	0.112797	0.265565	0.672594	0.754415	0.674079	0.661264
ENSMUSG00000067006	Serpinb5	0.552892	0.706319	0.699313	0.738736	0	0.0231415	0.165506	0.054673	0.489307	0.626878	0.705776	1.07613
ENSMUSG00000030495	Slc7a10	15.6833	19.4476	22.3907	20.3322	0.333753	0.234708	0.355702	0.506985	1.45056	0.599844	0.646601	1.08227
ENSMUSG00000021594	Srd5a1	0.903296	1.07611	0.885512	0.53737	0.0889044	0.10796	0.0564366	0.103993	0.420867	0.45719	0.496929	0.608668
ENSMUSG00000042189	Tekt3	0.26075	0.574136	0.283633	0.411658	0	0	0	0	0.118439	0.141099	0.17025	0.063002
ENSMUSG00000025215	Tlx1	0.106164	0.291203	0.266399	0.402554	0	0	0	0	0.309265	0.371366	0.269086	0.127701
ENSMUSG00000002781	Tmem143	0.814553	1.72981	1.0582	1.01643	0.380283	0.418466	0.324537	0.33654	0.799735	0.589125	0.534653	1.02958
ENSMUSG00000035861	Tmprss11b	0.405216	0.284631	0.385395	0.279929	0	0	0	0.021693	0.450365	0.270745	0.251678	0.376039
ENSMUSG00000054537	Tmprss11e	0.361111	0.516019	0.79809	0.352933	0	0	0	0	0.547583	0.436221	0.357724	0.375888
ENSMUSG00000010751	Tnfrsf22	1.93166	1.403	2.31554	1.82228	0.260228	0.477	0.396192	0.540716	0.765229	0.883144	0.788933	0.925584
ENSMUSG00000017607	Tns4	3.02614	3.66484	3.79479	3.31141	0.0765401	0.0779067	0.101074	0.13882	3.51691	3.54091	3.22404	3.66537
ENSMUSG00000022510	Trp63	0.217324	0.507002	0.186683	0.192386	0.0207919	0.0588662	0.0633339	0.0911041	0.290434	0.16801	0.230986	0.47995
ENSMUSG00000043029	Trpv3	0.023594	0.097957	0.08929	0.102177	0	0.008235	0	0	0.114825	0.053323	0.059886	0.101465
ENSMUSG00000027217	Tspan18	8.4108	4.81255	6.11858	4.99138	0.369455	0.313939	0.19454	0.462839	1.59464	0.947663	0.904803	0.537473
ENSMUSG00000006143	Upk3bl	0.717029	0.683821	0.423774	0.579802	0	0	0.104018	0	0.567679	0.41311	1.19253	0.36719
ENSMUSG00000085183	Wincr1	0.752134	0.306223	0.924237	0.479644	0	0	0	0	0.454887	0.170357	0.511826	0.233595
ENSMUSG00000030093	Wnt7a	3.70483	2.5691	2.60526	3.97513	1.52435	0.775502	0.71254	1.08203	2.19632	2.41333	2.00258	2.33272
ENSMUSG00000022382	Wnt7b	1.81724	2.89291	2.00889	1.92261	0.249338	0.284929	0.232565	0.336021	1.55998	1.54121	1.48708	2.03415

## Sheet: Table S3
Table S3 The information of 382 metabolites
Metabolites	mz	rt	type	Formula	Control	Control	Control	Control	Control	Control	Control	Control	LPS	LPS	LPS	LPS	LPS	LPS	LPS	LPS	UMI-77	UMI-77	UMI-77	UMI-77	UMI-77	UMI-77	UMI-77	UMI-77
Trimethylamine N-oxide	76.0757	339.9	POS	C3H9NO	8.60489	3.98877	6.57986	8.43829	6.43884	9.84931	3.64843	10.9141	7.43133	11.1694	20.8195	14.5651	20.4009	18.0677	9.13951	17.178	5.41249	5.13261	3.1452	1.84171	1.67836	7.95137	6.99184	6.76183
Arachidonic acid (AA)	303.233	35.5	NEG	C20H32O2	31.7528	12.9758	10.3501	16.3619	13.9128	28.1534	7.90788	18.6643	5.60297	6.34402	7.77679	8.19572	4.38735	6.32352	10.5309	6.48992	14.8688	24.9877	12.1834	23.4367	14.3172	11.3102	14.2706	12.1322
Dodecanedioic acid	229.144	395.3	NEG	C12H22O4	0.017814	0.0400671	0.0296249	0.0160381	0.0400591	0.018552	0.0287339	0.0116032	0.206033	0.145539	0.0932176	0.102163	0.0600686	0.0415612	0.0378821	0.0381455	0.0380773	0.0137992	0.0200986	0.0165738	0.0171044	0.0280894	0.0174472	0.0150109
Creatine	132.077	360.1	POS	C4H9N3O2	40.5775	28.2965	30.2369	35.0195	29.701	58.6374	31.5908	50.5241	44.8117	41.7302	43.6044	39.8996	69.7027	72.1358	44.2931	54.1296	40.1389	42.0511	33.4339	34.3595	31.7338	28.081	31.758	25.9163
Leucine	132.102	276.9	POS	C6H13NO2	6.38503	2.02454	1.52735	2.46662	1.48463	7.0953	1.22106	6.38058	6.97273	8.54141	8.68469	6.72304	11.8572	11.0675	7.92942	9.15572	2.79034	3.99744	2.37383	1.67596	1.67263	1.9524	3.0422	1.91502
2,4-Dihydroxybutanoic acid	101.025	41.8	NEG	C4H8O4	0.100447	0.0321484	0.0242576	0.114782	0.034466	0.11293	0.033368	0.122513	0.0594905	0.0510313	0.0195288	0.0184926	0.017624	0.0150109	0.0174175	0.00594104	0.0814196	0.0912862	0.0816848	0.0856963	0.105419	0.14034	0.0871875	0.0899418
Glycerophosphocholine	258.11	397.4	POS	C8H20NO6P	28.6852	85.0544	108.089	121.476	91.1495	4.45553	104.522	2.69349	20.6212	3.62587	7.92763	11.0485	4.99232	7.02655	15.1348	9.4117	55.5538	37.6008	37.61	36.842	14.4827	88.7747	32.7113	46.7777
Betaine	118.086	283.7	POS	C5H11NO2	27.1195	18.95	17.0026	22.8938	16.8609	42.0587	20.3662	31.2246	28.3513	37.2772	32.6953	32.0325	46.3542	32.87	32.2691	34.8745	21.0765	18.7146	20.5046	22.6137	20.6617	13.8724	9.80537	12.8215
PC(P-16:0/0:0)	480.344	206.5	POS	C24H50NO6P	6.58031	2.81844	2.41674	3.41056	2.31996	6.98875	2.28749	7.39157	11.8989	5.8268	6.02544	5.14085	8.22524	6.90112	8.39321	6.01387	2.57744	3.31575	1.62647	1.80303	1.52225	2.30866	4.47861	1.7842
PC(36:6)	778.538	604	POS	C44H76NO8P	0.0976195	0.046821	0.0864685	0.0519115	0.0188117	0.172987	0.0407757	0.0850601	0.169044	0.139251	0.0927782	0.110115	0.129324	0.106259	0.101339	0.239953	0.0668925	0.0556386	0.0668818	0.0716475	0.0823479	0.0580574	0.0824492	0.0665296
N-Methylnicotinamide	137.071	41.8	POS	C7H8N2O	0.127889	0.217296	0.241984	0.0835885	0.206475	0.134106	0.281181	0.190539	0.143908	0.0851405	0.121854	0.0729483	0.121717	0.122705	0.132439	0.108682	0.181392	0.305897	0.260939	0.264754	0.1181	0.26108	0.223423	0.284921
Inosine 5'-monophosphate (IMP)	347.04	72.8	NEG	C10H13N4O8P	0.10081	5.82768	5.63514	0.118929	7.57295	0.0760815	6.60867	0.0990422	11.3361	8.5409	8.88359	12.3869	4.53017	5.14624	3.67617	3.6557	0.0695305	1.87716	0.100616	0.0936725	0.127556	0.370227	0.71764	0.134189
Glucose	203.053	40.3	POS	C6H12O6	4.11783	3.36664	3.52973	4.58561	4.07355	7.32522	3.34115	6.56347	0.612028	0.986661	1.25664	0.880123	1.00299	1.39353	1.00444	1.53065	2.63818	2.32928	2.9859	2.51504	2.76721	2.25091	2.58189	2.07729
Butyrylcarnitine (Car(4:0))	232.155	273.1	POS	C11H21NO4	17.6499	8.1739	5.96646	26.0093	7.26563	20.361	7.33415	34.4734	16.2927	29.1788	21.4816	20.6936	32.6781	30.9218	23.2237	27.5732	7.3099	10.3949	5.78498	8.89553	8.33166	5.86727	8.69554	5.02884
Octenoylcarnitine	286.202	230.4	POS	C15H27NO4	0.100244	0.425705	0.367493	0.138652	0.350601	0.137028	0.365305	0.168295	0.0721612	0.0897113	0.0765081	0.0815459	0.11957	0.106734	0.0862716	0.105294	0.377019	0.23424	0.239766	0.300366	0.327315	0.309008	0.305896	0.363611
Prostaglandin F2alpha (PGF2a)	353.233	180.2	NEG	C20H34O5	0.448757	0.143105	0.105543	0.397147	0.12053	0.348912	0.0552417	0.483156	0.074208	0.0802137	0.0465161	0.0615371	0.0541131	0.0271116	0.0523029	0.0243373	0.332693	0.40381	0.358762	0.366556	0.351339	0.335689	0.368622	0.385694
Sorbose	203.053	40.3	POS	C6H12O6	4.11783	3.36664	3.52973	4.58561	4.07355	7.32522	3.34115	6.56347	0.612028	0.986661	1.25664	0.880123	1.00299	1.39353	1.00444	1.53065	2.63818	2.32928	2.9859	2.51504	2.76721	2.25091	2.58189	2.07729
Valerylcarnitine	246.171	257.1	POS	C12H23NO4	2.68097	2.59293	1.88124	3.04361	1.48787	3.37933	2.5715	3.82401	12.3177	11.3453	9.5038	9.32878	9.27405	8.62103	11.1507	10.0904	2.62783	2.56514	1.69997	1.61572	2.06498	2.30475	3.1097	1.70589
3-methylcytidine	258.109	255.7	POS	C10H15N3O5	0.115157	0.0198821	0.0143854	0.125858	0.0183725	0.200189	0.0148068	0.194283	0.195056	0.14674	0.186251	0.220014	0.37911	0.488196	0.185284	0.329373	0.0315078	0.0336328	0.0191774	0.0262031	0.0347724	0.0138365	0.0343089	0.00665049
5-Methylcytidine	258.109	237.5	POS	C10H15N3O5	0.0197865	0.0097128	0.00629516	0.0182032	0.00574623	0.0465638	0.00661368	0.038528	0.0265109	0.055953	0.0332463	0.0227249	0.0810209	0.093374	0.04269	0.0525068	0.0172538	0.016683	0.0100041	0.0108254	0.00752626	0.0109415	0.0168299	0.00851984
N-Acetylhistamine	154.098	134.4	POS	C7H11N3O	0.0604268	0.0139138	0.00404801	0.0791074	0.00984123	0.0297344	0.0143457	0.0163459	0.397725	0.747465	0.540649	0.292296	0.502228	0.745311	0.58423	0.540269	0.299026	0.259798	0.228565	0.175043	0.0886469	0.0276443	0.0489143	0.0134419
Cer(d18:1/16:0)	520.509	30.6	POS	C34H67NO3	0.336841	0.245478	0.231388	0.281831	0.257139	0.640608	0.258308	0.532257	0.489874	0.483585	0.517652	0.453248	0.921157	0.978389	0.611442	0.526213	0.334242	0.382449	0.329542	0.336034	0.338235	0.339655	0.430839	0.345971
2-Methylbenzoxazole	134.06	25.8	POS	C8H7NO	0.0988539	0.0278663	0.0186231	0.0649085	0.0257479	0.0915368	0.0193248	0.105307	0.139938	0.160087	0.281421	0.279215	0.426524	0.264342	0.138678	0.314567	0.223709	0.132466	0.0478689	0.0309674	0.0559647	0.0129718	0.0104398	0.0266983
Tagatose	203.053	40.3	POS	C6H12O6	4.11783	3.36664	3.52973	4.58561	4.07355	7.32522	3.34115	6.56347	0.612028	0.986661	1.25664	0.880123	1.00299	1.39353	1.00444	1.53065	2.63818	2.32928	2.9859	2.51504	2.76721	2.25091	2.58189	2.07729
Allose	203.053	40.3	POS	C6H12O6	4.11783	3.36664	3.52973	4.58561	4.07355	7.32522	3.34115	6.56347	0.612028	0.986661	1.25664	0.880123	1.00299	1.39353	1.00444	1.53065	2.63818	2.32928	2.9859	2.51504	2.76721	2.25091	2.58189	2.07729
Isovalerylcarnitine (Car(5:0))	246.171	257.1	POS	C12H23NO4	2.68097	2.59293	1.88124	3.04361	1.48787	3.37933	2.5715	3.82401	12.3177	11.3453	9.5038	9.32878	9.27405	8.62103	11.1507	10.0904	2.62783	2.56514	1.69997	1.61572	2.06498	2.30475	3.1097	1.70589
myo-Inositol	179.056	400	NEG	C6H12O6	0.302423	0.142949	0.157574	0.292781	0.174982	0.227937	0.153096	0.278669	0.142594	0.159599	0.0830092	0.11364	0.067133	0.111032	0.107579	0.0886318	0.19195	0.1941	0.216211	0.192595	0.252083	0.254688	0.213296	0.210003
4-Guanidinobutyric acid	146.092	371	POS	C5H11N3O2	0.227055	0.0846528	0.118936	0.117547	0.115941	0.329841	0.0892366	0.222575	0.459686	0.312162	0.281621	0.260908	0.35645	0.20221	0.355141	0.276074	0.127623	0.114812	0.0944442	0.0935403	0.100916	0.136765	0.125919	0.241595
6-Hydroxynorleucine	146.082	364.1	NEG	C6H13NO3	0.0579332	0.0478517	0.0429612	0.0680501	0.0462536	0.0691506	0.0465364	0.0634178	0.0289882	0.0236722	0.0183673	0.0148857	0.00659625	0.0249857	0.0236575	0.0241508	0.0414472	0.0502373	0.0498748	0.0489853	0.0493653	0.0491665	0.0428329	0.050353
1-Methylhistamine	126.103	352.1	POS	C6H11N3	0.772887	0.432327	0.389708	1.90278	0.468851	0.416161	0.304908	0.44671	3.09772	6.3361	3.73101	3.584	3.65185	4.03362	4.36622	4.01999	1.89218	1.66852	1.16554	1.18588	0.677067	0.50017	0.966014	0.564965
Stachydrine	144.102	283.1	POS	C7H13NO2	0.227968	0.218636	0.22967	0.162347	0.232578	0.333234	0.286088	0.256179	0.698821	0.493056	0.477652	0.362355	0.652583	0.419938	0.537618	0.415873	0.385987	0.33529	0.24458	0.234319	0.292305	0.228238	0.123754	0.264665
Cytosine	112.051	184.5	POS	C4H5N3O	0.287703	0.0723966	0.0564332	0.212397	0.059361	0.447704	0.054325	0.399824	1.25532	1.2577	1.21798	1.1476	1.34965	1.53185	1.21842	1.46914	0.281238	0.321116	0.239471	0.27822	0.385469	0.0463588	0.015511	0.0379678
2'-O-methylcytidine	258.109	174.9	POS	C10H15N3O5	0.0565481	0.00883664	0.0156633	0.0482602	0.00777649	0.079512	0.00875051	0.119394	0.0750856	0.094057	0.0768517	0.0801044	0.129647	0.146642	0.0923307	0.0997709	0.0217132	0.0335263	0.00544264	0.00619021	0.0191812	0.0167951	0.022102	0.00665715
Lauramine oxide	230.248	144.3	POS	C14H31NO	0.0718573	0.782986	0.414777	0.0709276	0.589878	0.190418	0.545289	0.120167	0.140643	0.114415	0.0919352	0.0410458	0.107163	0.109533	0.0674711	0.0718871	0.970526	0.779867	1.55481	1.24918	0.691477	1.82139	0.59198	2.20772
Galactose	203.053	40.3	POS	C6H12O6	4.11783	3.36664	3.52973	4.58561	4.07355	7.32522	3.34115	6.56347	0.612028	0.986661	1.25664	0.880123	1.00299	1.39353	1.00444	1.53065	2.63818	2.32928	2.9859	2.51504	2.76721	2.25091	2.58189	2.07729
Fructose	203.053	40.3	POS	C6H12O6	4.11783	3.36664	3.52973	4.58561	4.07355	7.32522	3.34115	6.56347	0.612028	0.986661	1.25664	0.880123	1.00299	1.39353	1.00444	1.53065	2.63818	2.32928	2.9859	2.51504	2.76721	2.25091	2.58189	2.07729
5-Hydroxyindole	134.06	25.8	POS	C8H7NO	0.0988539	0.0278663	0.0186231	0.0649085	0.0257479	0.0915368	0.0193248	0.105307	0.139938	0.160087	0.281421	0.279215	0.426524	0.264342	0.138678	0.314567	0.223709	0.132466	0.0478689	0.0309674	0.0559647	0.0129718	0.0104398	0.0266983
3'-O-methylcytidine	258.109	174.9	POS	C10H15N3O5	0.0565481	0.00883664	0.0156633	0.0482602	0.00777649	0.079512	0.00875051	0.119394	0.0750856	0.094057	0.0768517	0.0801044	0.129647	0.146642	0.0923307	0.0997709	0.0217132	0.0335263	0.00544264	0.00619021	0.0191812	0.0167951	0.022102	0.00665715
Decatrienoylcarnitine	310.202	324.4	POS	C17H27NO4	0.00393256	0.196002	0.168396	0.00475186	0.145222	0.00687223	0.213049	0.00705088	0.599541	0.560059	0.359847	0.405534	0.514666	0.141856	0.0983287	0.114383	0.00660037	0.0160001	0.00739864	0.00966082	0.0134136	0.0142724	0.010346	0.00946274
6-Methylnicotinamide	137.071	41.8	POS	C7H8N2O	0.127889	0.217296	0.241984	0.0835885	0.206475	0.134106	0.281181	0.190539	0.143908	0.0851405	0.121854	0.0729483	0.121717	0.122705	0.132439	0.108682	0.181392	0.305897	0.260939	0.264754	0.1181	0.26108	0.223423	0.284921
PC(32:2)	730.538	627.7	POS	C40H76NO8P	1.85647	1.40018	1.6164	1.25088	1.01241	1.67461	1.32046	2.07973	2.45388	2.7784	2.08411	1.99809	2.7828	2.82564	2.58576	1.31564	1.37507	1.53928	1.62275	1.83746	1.47376	1.36759	1.48851	1.43161
12(S)-HHTrE	279.197	453	NEG	C17H28O3	1.17819	0.382232	0.329049	1.64355	0.269544	0.722977	0.26696	0.860595	0.242471	0.288167	0.206817	0.223501	0.150091	0.131427	0.192772	0.104535	0.6378	0.864103	0.672018	0.734696	0.587968	0.620914	0.726329	0.730109
Phosphorylcholine	184.073	494.7	POS	C5H15NO4P	49.3156	39.7039	40.4241	83.2931	34.3402	56.989	49.6353	60.373	55.2555	73.7064	67.1384	72.664	72.5382	62.1355	62.4811	67.2797	63.1159	47.2728	30.8407	40.1734	13.2241	38.0113	34.4001	26.2544
Isocitric acid	191.02	55	NEG	C6H8O7	0.585823	0.134034	0.117772	0.419728	0.129757	0.506997	0.15563	0.63288	0.225817	0.161257	0.154247	0.148081	0.0920025	0.11945	0.118904	0.0980363	0.488713	0.654601	0.424077	0.492346	0.549983	0.575365	0.573293	0.556205
Adenosine 3'-monophosphate	346.056	417	NEG	C10H14N5O7P	0.0135457	0.00138004	0.00126251	0.0282448	0.00132219	0.0186855	0.00101242	0.0163573	0.00187917	0.00335814	0.000478922	0.001847	0.000184854	0.00101074	0.00223103	0.00038356	0.024716	0.0338387	0.0348004	0.0314153	0.0394667	0.0361674	0.0315975	0.0361971
2-Methylnicotinamide	137.071	41.8	POS	C7H8N2O	0.127889	0.217296	0.241984	0.0835885	0.206475	0.134106	0.281181	0.190539	0.143908	0.0851405	0.121854	0.0729483	0.121717	0.122705	0.132439	0.108682	0.181392	0.305897	0.260939	0.264754	0.1181	0.26108	0.223423	0.284921
Thiamine monophosphate	345.08	507	POS	C12H17N4O4PS	0.0346351	0.0661833	0.0834286	0.0688245	0.0601261	0.0343118	0.0605834	0.0374085	0.0297246	0.0217522	0.0189485	0.0150526	0.0346031	0.0309936	0.0154034	0.0131678	0.105912	0.129612	0.0806968	0.094751	0.067787	0.0754147	0.0853068	0.0340242
LPC(13:0)	452.279	222.2	NEG	C21H44NO7P	0.829888	0.481661	0.414906	0.664385	0.60668	0.864578	0.374067	0.988679	0.344161	0.489723	0.317492	0.312998	0.297281	0.404851	0.793747	0.43325	0.976831	0.911969	0.815849	0.684121	0.932777	0.79136	0.920903	0.755681
1-Methyladenosine	282.12	117.1	POS	C11H15N5O4	0.0175155	0.0285174	0.0215409	0.0117025	0.0212782	0.0456238	0.0197965	0.0590318	0.0539841	0.105837	0.097334	0.0937642	0.10367	0.129481	0.0644911	0.135338	0.0462992	0.0772235	0.0311366	0.0328379	0.0258092	0.0289496	0.0697275	0.0114494
N6-Methyladenosine	282.12	117.1	POS	C11H15N5O4	0.0175155	0.0285174	0.0215409	0.0117025	0.0212782	0.0456238	0.0197965	0.0590318	0.0539841	0.105837	0.097334	0.0937642	0.10367	0.129481	0.0644911	0.135338	0.0462992	0.0772235	0.0311366	0.0328379	0.0258092	0.0289496	0.0697275	0.0114494
5'-Methylthioadenosine	298.098	79.5	POS	C11H15N5O3S	4.57073	4.42769	3.70113	3.78532	2.37275	4.62703	3.83917	5.28112	0.566646	0.579427	0.408922	1.01005	0.46515	0.465331	0.460858	0.845906	2.80726	2.87107	2.13028	3.59136	2.53892	3.91804	2.6433	2.1697
Glutarylcarnitine	276.144	409.7	POS	C12H21NO6	0.0579441	0.0327589	0.019585	0.0500014	0.0271582	0.0919725	0.0215524	0.098658	0.129865	0.182418	0.139554	0.132719	0.18685	0.142716	0.161614	0.149853	0.0835726	0.0682046	0.028281	0.0451983	0.0737336	0.0259609	0.0193047	0.0223717
LPI(20:4)	621.304	257.1	POS	C29H49O12P	0.166892	0.0747942	0.0579556	0.126686	0.0505617	0.240134	0.0389947	0.275014	0.394304	0.423888	0.46079	0.366753	0.518785	0.397388	0.316405	0.480226	0.0592651	0.0880117	0.0455784	0.0469869	0.0393149	0.043856	0.119987	0.0380967
Oxododecanoylcarnitine	358.26	231.8	POS	C19H35NO5	0.623402	0.229699	0.249355	0.695945	0.204043	0.640446	0.180199	0.835103	0.740787	1.10352	1.07155	1.12455	1.42463	1.24608	0.882834	1.32791	0.386807	0.542616	0.19374	0.415135	0.320739	0.164712	0.192052	0.0723981
Citric acid	191.02	55	NEG	C6H8O7	0.585823	0.134034	0.117772	0.419728	0.129757	0.506997	0.15563	0.63288	0.225817	0.161257	0.154247	0.148081	0.0920025	0.11945	0.118904	0.0980363	0.488713	0.654601	0.424077	0.492346	0.549983	0.575365	0.573293	0.556205
Serine	104.035	396.7	NEG	C3H7NO3	0.0384141	0.0114577	0.0161846	0.0264728	0.0127173	0.0203247	0.0101925	0.0443453	0.0107901	0.011296	0.00859816	0.0125163	0.00370377	0.00930989	0.0104421	0.00492503	0.0164144	0.049931	0.0669389	0.0184378	0.0312289	0.0285438	0.0215939	0.0239635
N,N-Diethyl-2-aminoethanol	100.112	249.8	POS	C6H15NO	0.0636468	0.0312027	0.0352902	0.0374899	0.026772	0.0378903	0.00835636	0.0704208	0.0518875	0.133287	0.10606	0.152121	0.187544	0.154345	0.0832161	0.176657	0.0119833	0.0333412	0.00504718	0.0223838	0.0178015	0.0238859	0.00600568	0.010303
Oxotetradecanoylcarnitine	386.292	224.5	POS	C21H39NO5	1.81669	0.666845	0.871527	2.98231	0.748205	1.78654	0.817566	2.8396	1.85865	3.49315	2.61944	3.2782	4.09115	3.63638	2.62377	3.93484	1.27732	1.9544	0.636651	1.46732	1.20214	0.832603	0.457723	0.198796
gamma-Glutamylcysteine	251.07	48	POS		5.64709e-05	0.0671111	0.0661476	0.00547421	0.0302714	7.48979e-05	0.0833604	7.30172e-05	0.0551826	0.100496	0.0590597	0.0470244	0.0211459	0.162525	0.101012	0.106386	4.93441e-05	5.19611e-05	4.99853e-05	5.16627e-05	5.03447e-05	0.00143546	0.000976813	0.000469733
N,N-Dimethylarginine (ADMA)	203.151	508.2	POS	C8H18N4O2	3.89807	0.558839	0.401102	1.26922	0.513982	5.23766	0.471651	4.25972	3.08155	4.8067	4.60522	2.89575	7.20181	6.52333	4.30738	4.41554	1.19319	1.30091	0.584904	0.746571	0.33207	0.644339	0.904762	0.437116
2-Methylguanosine	298.115	170.8	POS	C11H15N5O5	0.0274419	0.0231286	0.0213371	0.0211069	0.0121583	0.02821	0.0231183	0.0336475	0.00904166	0.0101602	0.0172709	0.00738914	0.017874	0.0263742	0.00525287	0.0184475	0.0377039	0.0400632	0.0331158	0.0410802	0.0434452	0.0637476	0.0421857	0.0396903
Arachidonoylcarnitine (Car(20:4))	448.342	467.6	POS	C27H45NO4	3.08431	0.981567	0.867025	3.57307	0.575153	4.14729	0.958808	5.33697	0.865727	1.09362	0.453639	0.674533	1.42194	0.94921	0.965654	0.55272	1.77773	2.69753	3.26642	3.07175	3.40255	3.55048	2.70215	3.3336
PC(32:3)	728.525	619.1	POS	C40H74NO8P	0.427998	0.310815	0.358791	0.46108	0.206804	0.210219	0.273255	0.536733	0.513553	0.588604	0.396586	0.385782	0.517643	0.765168	0.495499	0.362506	0.216207	0.273472	0.272317	0.35258	0.245359	0.262407	0.230887	0.328508
Propionylcarnitine (Car(3:0))	218.139	314.3	POS	C10H19NO4	0.150253	0.0714987	0.110494	0.211452	0.0822818	0.112992	0.0830712	0.233397	0.249528	0.362345	0.372484	0.311865	0.249501	0.252853	0.209936	0.308766	0.0560439	0.0565663	0.048205	0.0548902	0.0452692	0.0503463	0.0728243	0.0577882
PC(20:1)	546.355	493.7	POS	C28H54NO8P	2.09399	0.911865	0.822442	2.13496	0.552791	2.99701	0.895993	2.10945	0.553069	0.74945	0.341935	0.327038	0.532493	0.926756	0.688408	1.22169	1.83578	1.47258	1.81983	1.69256	1.76203	1.12095	1.48728	1.26425
4-Hydroxyisoleucine	146.082	364.1	NEG	C6H13NO3	0.0579332	0.0478517	0.0429612	0.0680501	0.0462536	0.0691506	0.0465364	0.0634178	0.0289882	0.0236722	0.0183673	0.0148857	0.00659625	0.0249857	0.0236575	0.0241508	0.0414472	0.0502373	0.0498748	0.0489853	0.0493653	0.0491665	0.0428329	0.050353
Spermidine	146.166	78.4	POS	C7H19N3	0.401586	0.472753	0.464835	0.285913	0.346911	0.521719	0.420928	0.501365	0.561067	0.628234	0.535235	0.454615	0.587238	0.659213	0.504848	0.463442	0.329353	0.357978	0.357959	0.359829	0.352602	0.419048	0.367922	0.32769
Dimethylmalonic acid	131.035	86.2	NEG	C5H8O4	0.685348	0.183375	0.242713	0.584163	0.95433	0.421925	0.502953	0.511504	0.0405037	0.0720459	0.0521507	0.0362253	0.066599	0.0236311	0.0536099	0.0576027	0.720483	0.380279	0.283607	0.373766	0.233347	0.204019	0.395307	0.228389
4-Nitroaniline	139.05	67.3	POS	C6H6N2O2	0.196868	0.0519209	0.0643319	0.015468	0.0401061	0.413064	0.0190205	0.0966818	0.304834	0.0900082	0.297606	0.271744	0.256783	0.20514	0.309652	0.220717	0.0355216	0.0307027	0.0375573	0.0285334	0.0104439	0.0313292	0.102807	0.0534738
Cytidine 5'-monophosphate (CMP)	324.061	441.3	POS	C9H14N3O8P	0.00518151	0.0059169	0.00606001	0.0130566	0.0060194	0.0594863	0.0043773	0.0226616	0.0454133	0.141888	0.0972057	0.0814583	0.187898	0.17297	0.0914214	0.108055	0.00575219	0.00806343	0.00534972	0.00530431	0.00498382	0.00638936	0.00549029	0.00478451
8,11-Eicosadiynoic acid	303.233	555.3	NEG	C20H32O2	0.0988625	0.0482047	0.0266099	0.0922242	0.034192	0.0956462	0.0345802	0.127748	0.0354721	0.0469313	0.0312892	0.0368887	0.0368792	0.0222469	0.0389652	0.0318134	0.108023	0.0988478	0.0912616	0.0998304	0.126018	0.114822	0.0768725	0.104241
SL 10:0;O/10:0	406.263	546	NEG		0.000141041	0.000220865	1.11035e-05	1.133e-05	1.60184e-05	1.04944e-05	0.000224714	1.07512e-05	0.00851707	0.00969007	0.00912835	0.00856702	0.00499376	0.000437305	0.000208382	0.000184948	1.05569e-05	1.04726e-05	1.05372e-05	1.0273e-05	0.000135946	0.000286653	8.37391e-05	1.04568e-05
LPC 20:4	602.346	481.2	NEG		0.541985	0.277348	0.269282	0.523112	0.252969	0.416426	0.249481	0.503933	0.122145	0.145966	0.0852073	0.0791123	0.0996379	0.21996	0.286777	0.19562	0.380833	0.39299	0.385641	0.451013	0.333428	0.302289	0.367635	0.406225
2-[(3-Fluoro-4-methylphenyl)amino]-4-methylquinolin-5-ol	283.124	295.1	POS	C17H15FN2O	0.0908164	0.0486954	0.0483406	0.0891852	0.0462389	0.0883088	0.0447449	0.134191	0.143328	0.167716	0.130628	0.160875	0.196257	0.219297	0.141528	0.214535	0.0964794	0.0939794	0.0633149	0.0764782	0.0656817	0.0538562	0.0637951	0.0358493
5-Methylisoxazol-3-amine	99.0553	188	POS	C4H6N2O	0.0646446	5.29242e-05	5.15243e-05	0.0780644	5.39152e-05	0.0923022	5.39362e-05	0.0687288	0.0801901	0.100608	0.0828745	0.0815454	0.123299	0.137443	0.0896067	0.0753286	0.0289247	5.19611e-05	4.99853e-05	5.16627e-05	5.03447e-05	5.25157e-05	0.0100126	0.0560311
7-HDoHE	343.228	46.5	NEG	C22H32O3	0.993696	0.601494	0.229039	2.19512	0.599653	1.85272	0.341578	1.581	0.656948	0.725537	0.338167	0.346086	0.414446	0.234454	0.378761	0.18457	1.73005	1.79758	2.38707	2.08681	2.584	2.80874	1.97189	2.62092
NAE 13:0	258.243	486.3	POS		0.112541	0.107745	0.0999084	0.07779	0.118136	0.164255	0.108869	0.123311	0.119568	0.131498	0.139675	0.12106	0.15497	0.16828	0.122239	0.199545	0.0942186	0.102726	0.0915332	0.0926925	0.110891	0.10436	0.107945	0.0859966
3,4-Dihydro-3-oxo-2H-(1,4)-benzoxazin-2-ylacetic acid	206.046	237.3	NEG	C10H9NO4	0.0154534	0.00517678	0.00210409	0.0126447	0.00696678	0.0104347	0.0038979	0.0197592	0.00475953	0.00540733	0.00337773	0.00235933	0.00351322	0.00118615	0.0061961	0.00329046	0.00748502	0.00537026	0.00855226	0.00842932	0.00694338	0.00842628	0.00666255	0.00975696
Quinoline-2,6-diol	160.041	236.9	NEG	C9H7NO2	0.0607255	0.0164246	0.0150176	0.00724511	0.0175733	0.0517081	0.010149	0.0441992	0.0192418	0.0201173	0.0111137	0.00752404	0.0101369	0.00304253	0.00564186	0.00338359	0.031895	0.0310197	0.0482871	0.0450879	0.0351268	0.0474488	0.0314575	0.0563282
Anticopalic acid	303.233	190.1	NEG	C20H32O2	0.0366263	0.0156631	0.014076	0.0515417	0.0174364	0.0416631	0.0151905	0.0472324	0.0167737	0.0110789	0.012385	0.00807251	0.00970945	0.0109761	0.0145987	0.00621197	0.0187093	0.0197588	0.0274405	0.0225239	0.0244687	0.0232232	0.0202738	0.0233288
6,15-Diketo-13,14-dihydroprostaglandin F1.alpha.	369.228	161.9	NEG	C20H34O6	0.187375	0.0457158	0.041959	0.16602	0.0593638	0.092654	0.0346289	0.134194	0.0236633	0.0309139	0.0245566	0.0391158	0.0175639	0.0163514	0.0293846	0.0177584	0.0993145	0.135686	0.0893288	0.112782	0.115021	0.106778	0.142121	0.108584
1,2-Diarachidonoyl-sn-glycero-3-phosphocholine	830.569	138.4	POS	C48H80NO8P	19.4699	9.94602	11.4693	11.5153	11.3456	25.9243	8.30937	21.4972	28.6218	22.3335	22.5368	16.4823	38.6167	28.3675	26.7074	24.8382	17.9252	21.403	13.2803	15.0458	14.0202	10.9695	15.1786	7.89573
Norethindrone	299.2	99.3	POS	C20H26O2	0.130996	0.0822921	0.0738209	0.0942508	0.053706	0.108782	0.0258078	0.166361	0.138119	0.164563	0.161552	0.141719	0.175791	0.163986	0.122789	0.149442	0.0491822	0.0227698	0.0169549	0.027206	0.0156467	0.031582	0.0689925	0.0266772
LPC 22:6	626.346	477	NEG		0.331728	0.150309	0.125172	0.392373	0.126702	0.321211	0.134624	0.281074	0.154005	0.165998	0.0902104	0.0787473	0.118741	0.124017	0.175877	0.106598	0.540409	0.272696	0.301689	0.298813	0.388717	0.296835	0.449384	0.354223
1-Isopropylpiperazine	129.139	34.5	POS	C7H16N2	0.278486	0.364428	0.457512	0.214082	0.34445	0.315503	0.506345	0.317147	0.330264	0.514109	0.603851	0.566504	0.619669	0.829678	0.470179	0.559511	0.245062	0.264906	0.268651	0.241795	0.189589	0.318954	0.256153	0.251488
Val-Asp	233.113	390.7	POS	C9H16N2O5	0.00987952	0.000861236	0.00167419	0.00651883	0.00032074	0.00388057	5.39362e-05	0.00416127	0.0103539	0.0229837	0.0152357	0.0168514	0.00965609	0.0124915	0.0206105	0.0181602	0.00213203	0.00277198	0.00262234	0.00222183	0.00130708	0.000852549	0.002042	0.00103266
6,7-Dihydro-2-methyl-5H-cyclopenta[b]pyrazine	135.092	222.2	POS	C8H10N2	0.0990626	0.056777	0.0472721	0.0591676	0.0530272	0.12412	0.0407978	0.114597	0.132501	0.13226	0.111858	0.114481	0.226662	0.144386	0.129178	0.116291	0.0850655	0.0847541	0.0704991	0.0687447	0.104506	0.087497	0.0856584	0.0643174
3-Hydroxyoleylcarnitine	442.353	215.7	POS	C25H47NO5	4.82796	3.01446	3.69693	5.38799	3.38196	5.83286	3.35322	8.85022	7.29597	11.7208	9.32716	12.0756	14.6664	12.8454	9.7774	14.5381	3.71476	7.23794	2.613	5.93835	4.58092	2.21806	1.56431	0.825788
1-Hexadecyl-2-(9Z-octadecenoyl)-sn-glycero-3-phosphocholine	746.606	150.3	POS	C42H84NO7P	6.56249	1.2155	0.904171	5.368	0.851622	8.12187	1.25169	8.55913	7.62573	11.194	7.57433	5.14357	8.93598	13.6384	8.6723	7.46073	3.27801	4.56435	4.95546	5.06491	3.22932	5.85544	6.52129	5.582
5-(2-Furyl)-4H-1,2,4-triazol-3-amine	151.062	85.6	POS	C6H6N4O	0.0206415	0.1018	0.0572091	0.0708106	0.019047	0.133052	0.0745614	0.171431	0.150771	0.217005	0.31692	0.152138	0.605251	0.506953	0.182948	0.211412	0.111007	0.100949	0.073232	0.0831319	0.0893217	0.0923053	0.0834815	0.0249511
2-Hydroxy-6-methylpyridine-4-carboxylic acid	154.05	75.5	POS	C7H7NO3	0.0392737	0.042637	0.0548621	0.0652178	0.0215955	0.0633858	0.043784	0.0362379	0.511716	0.663955	0.936216	0.686304	1.10188	0.599897	0.625013	0.644778	0.131867	0.181285	0.08699	0.0700282	0.0716664	0.07915	0.0818987	0.0538926
Methyl 1H-benzimidazole-5-carboxylate	177.066	75.5	POS	C9H8N2O2	0.0483234	0.0718053	0.0282851	0.0328401	0.03168	0.0992004	0.0218793	0.0690259	0.493158	0.668576	0.847055	0.667185	1.00341	0.54638	0.560679	0.641419	0.178219	0.192403	0.0921175	0.0974226	0.0911954	0.10129	0.0927073	0.0468933
11(R)-HETE	319.228	46.6	NEG	C20H32O3	4.31531	3.27159	1.32531	12.258	3.11147	8.29522	1.48901	7.97543	2.07126	2.39996	1.24661	1.07902	0.951438	0.861094	2.13886	0.844619	6.84781	7.85774	10.08	8.59664	9.29073	12.0157	7.21533	10.728
LPG 20:1	537.321	551.4	NEG		0.0041458	0.00274638	0.00182573	0.00790736	0.00187306	0.00418818	0.00291914	0.00467716	0.00197033	0.00148008	0.00155383	0.00132117	0.000734607	0.00216093	0.00246384	0.00126473	0.00281041	0.00266865	0.00424488	0.0028986	0.00267604	0.0027302	0.00214746	0.00267317
LPC 20:3	604.361	493.8	NEG		0.0597917	0.0355858	0.0316273	0.0779034	0.031137	0.0721518	0.0352666	0.0555434	0.0167298	0.0181985	0.00988631	0.0118802	0.0144963	0.0211028	0.0246071	0.0336653	0.0711984	0.0447241	0.0666164	0.0530392	0.0595725	0.0326553	0.0445291	0.0441603
LPE 16:1	450.263	485.1	NEG		0.0632095	0.019376	0.0157874	0.0231106	0.0154351	0.0529561	0.0119932	0.0455062	0.0114585	0.018819	0.00897866	0.0106415	0.00923148	0.0117694	0.0175884	0.0107601	0.0777581	0.0374598	0.0576749	0.0333515	0.0633108	0.0497606	0.0696435	0.0354341
DGDG O-17:2_26:7	1037.66	480.5	POS		0.0496086	0.00269251	0.00575283	0.0226106	0.00263263	0.0444432	0.00266816	0.0572531	0.00194753	0.00397029	5.8753e-05	5.27635e-05	0.00244671	0.0027443	0.00516071	6.68387e-05	0.0333609	0.0158998	0.0294662	0.0234152	0.0170493	0.0118698	0.0205172	0.023948
LPC 16:3	548.301	442.8	NEG		0.00620843	0.00181767	0.00192372	0.00574172	0.00114193	0.00390523	0.00133365	0.00546043	0.00105318	0.00130956	0.00088034	0.000523228	0.00046011	0.00260882	0.0037764	0.000846872	0.00299006	0.00365839	0.0039024	0.00351693	0.00322253	0.00282673	0.00298479	0.00423512
6-Pentyl-2H-pyran-2-one	165.092	410.1	NEG	C10H14O2	1.07001e-05	0.00897714	0.00842756	0.000215972	0.00807727	1.04944e-05	0.00937122	1.07512e-05	0.030423	0.0332459	0.0158364	0.0207116	0.0438838	0.00376043	0.00312933	0.00584942	1.05569e-05	1.04726e-05	1.05372e-05	1.0273e-05	1.06324e-05	0.000126185	0.00494912	1.04568e-05
N-Methyl-.alpha.-aminoisobutyric acid	118.087	323.5	POS	C5H11NO2	0.989038	0.583581	0.456321	0.725106	0.415959	1.1687	0.555706	1.00078	0.982219	1.23865	1.30427	0.992674	1.80652	1.4146	1.03547	1.30461	0.645158	0.728662	0.454832	0.465809	0.289038	0.452443	0.50995	0.36557
4-Ethoxy-4-oxobut-2-enoic acid	143.035	312.2	NEG		0.0395098	0.0182555	0.0170991	0.0496769	0.0281538	0.0533892	0.0180071	0.0567359	0.00407263	0.00453838	0.00415022	0.002597	0.00118796	0.00375494	0.00195606	0.00292827	0.0298905	0.0281635	0.0334199	0.027939	0.0317352	0.0212169	0.0317763	0.0255109
3-Piperidin-4-ylpropanoic acid	158.118	274.5	POS	C8H15NO2	0.146539	0.0366113	0.0162902	0.181824	0.0304684	0.37269	0.0396041	0.213081	0.846583	0.469383	0.436652	0.425389	0.715381	0.444845	0.627502	0.507251	0.0740161	0.0653517	0.0418574	0.0402057	0.0427649	0.0187964	0.0261254	0.0275687
Methyl_2-(10-heptadecenyl)-6-hydroxybenzoate	389.305	254.5	POS		0.00354576	0.000845885	0.00046918	0.0030397	5.39152e-05	0.00584568	0.000648295	0.00583085	0.00740969	0.0099275	0.009041	0.00881299	0.0126934	0.00978955	0.00687613	0.0128575	0.000931648	0.00109421	0.000718076	0.000623774	0.000378497	0.000367225	0.00180378	0.000198731
Ile-Thr	233.15	250.8	POS	C10H20N2O4	0.0284376	0.0065558	0.00471757	0.0645806	0.00226785	0.0189766	0.00222313	0.0168374	0.0509326	0.134082	0.0987515	0.0605044	0.0424587	0.0568583	0.15929	0.11428	0.0157294	0.0179965	0.00870073	0.0108431	0.00964349	0.0084736	0.0104749	0.00799109
Piperazine	87.0918	240.7	POS	C4H10N2	0.0873232	0.0715133	0.0700787	0.0647873	0.0728505	0.109095	0.0745276	0.104653	0.109337	0.122829	0.0913405	0.102561	0.134543	0.14196	0.108735	0.1022	0.078304	0.0718372	0.0677525	0.0676708	0.0337977	0.0718995	0.0843702	0.064957
4-Hydroxychalcone	225.091	202.4	POS	C15H12O2	0.177276	0.0396677	0.0156121	0.00737248	0.0281878	0.189281	0.00424595	0.186174	0.112312	0.22459	0.144974	0.106572	0.289135	0.296247	0.174459	0.174054	0.0932628	0.0421682	0.0332222	0.0368661	0.0115169	0.0113209	0.0452902	0.02332
4-Piperidinecarboxamide, 4-amino-N-[(1S)-1-(4-chlorophenyl)-3-hydroxypropyl]-1-(7H-pyrrolo[2,3-d]pyrimidin-4-yl)-	427.166	179.8	NEG	C21H25ClN6O2	0.00483805	0.00232142	0.00145164	0.00335525	0.00150617	0.00385239	0.00101477	0.00547894	0.000963435	0.000753255	0.00100099	0.000929049	0.000701989	0.000594238	0.00116626	0.000482167	0.00390161	0.00464623	0.00381818	0.00358217	0.00406727	0.0039533	0.00349253	0.0043093
5-Nitro-2-propoxyaniline	197.092	127.2	POS	C9H12N2O3	0.0330266	0.00234539	0.00107078	0.00653045	0.00159409	0.0555416	0.00109251	0.0819788	0.112539	0.159315	0.16676	0.103433	0.226468	0.317025	0.107545	0.234323	0.0049294	0.00754044	0.00664668	0.00831554	0.00385184	0.00490214	0.0133019	0.000752492
Prostaglandin A1	335.223	101.3	NEG	C20H32O4	0.112725	0.0339403	0.0215858	0.197722	0.0324792	0.148349	0.0136793	0.14522	0.0320449	0.0398592	0.0213126	0.0245983	0.0224604	0.0173648	0.044483	0.0133321	0.120407	0.300641	0.243674	0.112039	0.340687	0.255172	0.242392	0.189954
LNAPE 18:1/N-20:4	764.525	632.7	NEG		0.0822435	0.0719388	0.0729135	0.0693997	0.0840319	0.0836319	0.0710775	0.0758468	0.065565	0.0709195	0.0617503	0.0623122	0.081079	0.0602788	0.0635871	0.0716594	0.0997148	0.0897353	0.08808	0.0816531	0.0899369	0.0825751	0.0983414	0.0868997
PG 20:4_22:6	841.501	581.7	NEG		0.0455664	0.0629404	0.0705719	0.0700722	0.0541163	0.0408688	0.0598476	0.0483642	0.118222	0.0943475	0.0867615	0.0974419	0.0811222	0.0693584	0.0770382	0.0717643	0.0446669	0.0548883	0.0395594	0.0568065	0.0494307	0.0611713	0.0442998	0.0641649
LPS 16:0	496.268	529.3	NEG		0.0238895	0.0337395	0.0133607	0.028676	0.0195032	0.0330071	0.0145741	0.0278242	0.0134873	0.0157586	0.018118	0.0126424	0.0176678	0.0165214	0.0219535	0.0171054	0.027386	0.0330165	0.0344116	0.0301278	0.0402622	0.0360141	0.036185	0.031126
LPE O-16:2	434.267	498.9	NEG		0.00554159	0.00357002	0.00316987	0.00278871	0.00218867	0.00759819	0.00245815	0.005492	0.00205026	0.00348881	0.00166561	0.00245182	0.00161017	0.00194391	0.00344366	0.00257259	0.0105616	0.00541992	0.00543898	0.00507201	0.00657363	0.00476164	0.0088377	0.00362467
PC O-20:4	544.341	481.2	POS		14.6917	6.53818	6.57823	12.2669	4.18888	18.0264	5.84989	18.1355	3.25576	4.49501	2.53299	1.9549	3.53172	7.68462	7.25606	6.18507	10.0922	10.2264	10.6287	11.7735	9.11903	10.0458	9.42137	9.84956
3-Methoxy-5-pentyl-2-prenylphenol	261.187	453	NEG	C17H26O2	0.0281903	0.0090807	0.00756097	0.0396502	0.00643696	0.0168547	0.00631425	0.0204932	0.0051997	0.00681304	0.00516063	0.00532701	0.00379849	0.00296059	0.00452536	0.00280805	0.0151769	0.0208993	0.0156248	0.0172452	0.0135782	0.0145711	0.0174403	0.0181149
1a,1b-Dihomoprostaglandin F2.alpha.	381.265	412.6	NEG	C22H38O5	0.0203355	0.00683167	0.00650651	0.0223048	0.0054143	0.0153722	0.00309716	0.0253558	0.0126484	0.00682503	0.00464907	0.0062112	0.00339802	0.0022708	0.00575418	0.00163737	0.0304818	0.037636	0.0336476	0.0368633	0.0313393	0.030294	0.0317631	0.040449
(Z)-5-(1,2,4a,5-Tetramethyl-7-oxo-3,4,8,8a-tetrahydro-2H-naphthalen-1-yl)-3-methylpent-2-enoic acid	319.227	388.5	POS	C20H30O3	0.701913	0.193183	0.179409	0.56967	0.0857647	0.581372	0.0493862	0.868133	0.151004	0.207143	0.109707	0.0920657	0.103503	0.0397418	0.117096	0.0371116	0.465086	0.570172	0.528595	0.498058	0.498653	0.500311	0.538446	0.493476
1-(3,5-Dihydroxyphenyl)-2-[(1,1-dimethylethyl)amino]ethanone	222.114	371.3	NEG	C12H17NO3	1.07001e-05	0.00329907	0.00190675	1.133e-05	0.00271113	1.04944e-05	0.00301426	8.56856e-05	0.0296887	0.02898	0.014217	0.0201493	0.0648438	0.000879705	0.000790336	0.00157972	9.70776e-05	6.61721e-05	1.05372e-05	1.0273e-05	9.8162e-05	0.000197281	9.05437e-05	1.04568e-05
4-HYDROXYCYCLOHEXANECARBOXYLIC ACID	143.072	232.9	NEG		0.014197	0.00990176	0.0106941	0.0213228	0.0117263	0.0190815	0.00914989	0.0196637	0.00989912	0.0106285	0.0087341	0.0095954	0.0112387	0.00864247	0.00938941	0.00847126	0.01516	0.014504	0.0142281	0.0146045	0.0196816	0.016998	0.0140819	0.0151289
Phe-Gly-Gly	280.13	108.8	POS	C13H17N3O4	0.0119128	0.0170255	0.0138578	0.0435432	0.00743741	0.0115447	0.00340873	0.00653966	0.0616156	0.0595279	0.0708578	0.0680448	0.0641186	0.0343751	0.0327473	0.0570196	0.0103362	0.026398	0.0158064	0.0135122	0.0095027	0.0168964	0.0313633	0.0160717
Pro-Glu	245.114	423.1	POS	C10H16N2O5	0.0617476	0.0215657	0.027199	0.0373239	0.0174283	0.0498779	0.016643	0.0436135	0.0508411	0.0535905	0.057233	0.048116	0.0876081	0.0862869	0.0627591	0.0703399	0.034325	0.0353695	0.0237079	0.0295275	0.0160224	0.0197148	0.0241952	0.0142052
p-Phenylenediamine	109.076	352.2	POS	C6H8N2	0.0584546	0.0333743	0.0281796	0.136796	0.0358692	0.0322234	0.0251655	0.0224933	0.228025	0.457832	0.273008	0.25338	0.269133	0.292169	0.311026	0.288615	0.135874	0.122406	0.0852209	0.089091	0.0498025	0.036528	0.0721388	0.0392972
3-Hydroxyhexadecanoylcarnitine	416.338	219.2	POS	C23H45NO5	9.26648	4.00058	4.31664	8.48348	3.53055	7.81138	3.47488	14.7549	12.0457	18.0114	14.4085	17.0758	23.6953	21.7357	14.3603	21.7393	4.66666	7.79614	2.90909	6.55724	3.71341	3.69911	2.85658	1.52471
6-(1H-Pyrazol-1-yl)nicotinic acid	190.061	184.5	POS	C9H7N3O2	0.0500714	0.0055921	0.00511536	0.0456491	0.00494931	0.0757368	0.00532603	0.0593165	0.211604	0.216578	0.177074	0.19815	0.225155	0.272181	0.207812	0.247528	0.0537111	0.0634095	0.0363306	0.0487704	0.0651243	0.00679154	0.00767143	0.00485797
2-(1-Hydroxycyclohexyl)butanoic acid	185.119	54.9	NEG	C10H18O3	0.0146766	0.0279346	0.0281751	0.0111562	0.032154	0.0131386	0.0176902	0.00304537	0.105164	0.0805898	0.0662887	0.0753291	0.0467668	0.0227594	0.0335306	0.0246231	0.0235351	0.0247816	0.0215373	0.0139017	0.0294033	0.0181015	0.0166638	0.0104378
PG 16:0_16:1	719.488	615	NEG		0.0904053	0.0497842	0.0548558	0.0781812	0.0573734	0.0686618	0.0471788	0.0868539	0.0367444	0.0413218	0.0325891	0.0374696	0.0376072	0.0470404	0.0472813	0.0403513	0.0614417	0.0701914	0.0630803	0.0647637	0.0718065	0.0720792	0.0700599	0.0752026
Tridecanedioic acid	243.161	414.7	NEG	C13H24O4	0.00542811	0.00968212	0.00828619	0.00607366	0.0117515	0.00703443	0.00978322	0.00508371	0.0310194	0.01959	0.0228689	0.0207105	0.0110488	0.00812513	0.00750778	0.00719564	0.00558667	0.00387801	0.00647031	0.00470714	0.0064581	0.00561949	0.0060394	0.00565695
3'-CMP	324.06	44.2	POS		0.0513225	0.620262	0.510054	0.309166	0.421469	0.241263	0.528328	0.132806	0.875178	0.844113	0.667441	0.667593	0.605602	0.839582	0.620256	0.647449	0.144353	0.485234	0.21849	0.229972	0.294096	0.300207	0.323018	0.222894
Thymopoietin II (32-34)	418.242	433.9	POS	C16H31N7O6	0.00638317	0.00061445	0.00103346	0.000650127	0.000943667	0.00570314	0.000158592	0.00561528	0.00892526	0.00828196	0.00986336	0.00770121	0.0126971	0.0202252	0.0126594	0.0130243	0.000205152	0.00149774	0.000707674	0.000903224	5.03447e-05	0.000155785	0.00271499	0.000914494
3-{[4-(Trifluoromethyl)phenyl]amino}cyclohex-2-en-1-one	256.095	420.8	POS	C13H12F3NO	0.0247237	0.0731345	0.10983	0.107215	0.0644654	0.00821623	0.0913725	0.00543741	0.0158651	0.0028453	0.0100912	0.00983353	0.00937917	0.0105575	0.0137309	0.0126851	0.0351152	0.0248472	0.0300408	0.0333261	0.0121952	0.0565059	0.0181089	0.0290782
Moxonidine	242.079	417	POS	C9H12ClN5O	0.717563	3.496	3.24318	4.89129	3.53993	0.161698	5.43794	0.128182	0.590248	0.147397	0.235987	0.358645	0.152514	0.196616	0.439209	0.23884	1.63453	1.08901	1.0612	1.22646	0.54072	3.1544	0.890105	1.73182
2-[(6-Amino-9H-purin-8-yl)thio]acetic acid	226.039	240.1	POS	C7H7N5O2S	0.0350425	0.000170083	0.000255279	0.00125015	5.39152e-05	0.0408521	0.000363232	0.0280412	0.024989	0.146285	0.0181066	0.0047995	0.111046	0.0593714	0.0921932	0.0287999	4.93441e-05	0.000999142	0.000455139	0.00127627	0.00183984	5.25157e-05	5.2198e-05	0.000118519
Sambutoxin	452.28	237.6	NEG	C28H39NO4	0.0103709	0.00642233	0.00528457	0.0110574	0.00827417	0.012267	0.00498261	0.0132514	0.00517075	0.00625444	0.00444645	0.00436038	0.00317209	0.00440609	0.0108749	0.00554824	0.0161352	0.0125482	0.0123016	0.00988631	0.0151575	0.011686	0.012301	0.0121834
Isoalantolactone	233.154	99.4	POS	C15H20O2	0.0264255	0.0303341	0.0304365	0.0213912	0.037105	0.0202316	0.00952589	0.0723829	0.0477741	0.0614807	0.0507062	0.0390887	0.0534358	0.0552942	0.0427771	0.0515921	0.01269	0.0231248	0.0174769	0.021976	0.0190686	0.0198505	0.029888	0.0108619
(1S,2S,3R,4R)-4-Amino-1,2,3-cyclopentanetriol	134.081	53.5	POS	C5H11NO3	0.291867	0.163538	0.170006	0.253409	0.0841195	0.317904	0.134679	0.319759	0.033043	0.0394829	0.0476769	0.0436343	0.075935	0.0520721	0.044119	0.0400783	0.168421	0.199758	0.0898111	0.163186	0.121429	0.210838	0.134537	0.0748646
SHexCer 38:5;3O	842.506	581.8	NEG		0.0227953	0.0318553	0.0345396	0.0370055	0.0271913	0.0218891	0.0305353	0.0230743	0.0609014	0.0489715	0.0444162	0.0499562	0.041224	0.0349651	0.0387122	0.0343039	0.0210997	0.0278321	0.0183201	0.0290086	0.0242633	0.0314496	0.0211351	0.0326237
PG 22:6_22:6	865.505	577.4	NEG		0.100881	0.167368	0.180274	0.114881	0.176401	0.0925111	0.162361	0.0823734	0.32122	0.231918	0.25136	0.273606	0.202531	0.149741	0.188009	0.249614	0.114998	0.0934423	0.101544	0.12118	0.132412	0.140242	0.0988979	0.130556
LPG 16:1	481.256	509.1	NEG		0.0977046	0.03576	0.0213264	0.0850329	0.0208494	0.0762848	0.0212928	0.0844709	0.0169989	0.0217488	0.0138147	0.0130476	0.0116941	0.0289554	0.0352083	0.0161767	0.0694654	0.0688451	0.0704008	0.0621367	0.0824247	0.0644178	0.0584317	0.0679139
5Z,8Z,11Z,14Z-Eicosatetraenoic acid, 3-theinylmethyl ester	401.252	207.6	POS	C25H36O2S	5.64709e-05	0.0128778	0.0191586	4.99561e-05	0.00878014	7.48979e-05	0.00470003	7.30172e-05	0.0256111	0.0296603	0.0247158	0.0193225	0.017585	0.0126513	0.0227328	0.0222629	4.93441e-05	5.19611e-05	0.000354335	5.16627e-05	5.03447e-05	5.25157e-05	0.000517578	0.000660209
N-Methylcalystegine_B2	190.108	232.8	POS		0.0204478	0.147851	0.160965	0.0515206	0.233134	0.020402	0.21082	0.0251403	0.0183905	0.0344197	0.0196137	0.0138576	0.0287869	0.0405046	0.0286745	0.0276207	0.271931	0.245504	0.665436	0.543576	0.19142	0.196763	0.13366	0.188459
.alpha.-Hydroxymetoprolol	284.187	231.9	POS	C15H25NO4	0.0162666	0.0179481	0.00833538	0.017014	0.00909628	0.0245731	0.0112084	0.0298107	0.022249	0.0246259	0.0267257	0.0276312	0.0423282	0.0429228	0.0244782	0.0422798	0.0175187	0.0166545	0.00970007	0.0142556	0.0214623	0.0065723	0.0121211	0.0102952
(2R,4aS,6aR,6aS,14aS,14bR)-10,11-Dihydroxy-2,4a,6a,6a,14a-pentamethyl-8-oxo-1,3,4,5,6,13,14,14b-octahydropicene-2-carboxylic acid	451.248	161.8	NEG	C28H36O5	0.00349782	0.00729047	0.00198305	0.0047284	0.00368754	0.00433749	0.00176391	0.00269127	0.00149675	0.00301298	0.00191337	0.00120729	0.00144644	0.0019434	0.00345147	0.00122283	0.00270048	0.00325902	0.00421546	0.00335477	0.00354817	0.00361559	0.00399275	0.00398002
2,4,6-Tri-tert-butylaniline	262.253	30.2	POS	C18H31N	0.022796	0.014722	0.0113346	0.0219771	0.0149023	0.0362867	0.0164248	0.0420986	0.0366462	0.0277366	0.0273422	0.0282824	0.0522256	0.0551254	0.0363347	0.0362981	0.0175822	0.0196653	0.0142493	0.0141086	0.01671	0.0138736	0.0192761	0.0143887
PG 16:0_18:3	743.488	616.9	NEG		0.0190199	0.0172249	0.0242619	0.0139831	0.0190105	0.0145	0.0191919	0.0229752	0.0268911	0.0327475	0.0263227	0.0293948	0.0262867	0.0247618	0.0316067	0.021889	0.0117853	0.0131109	0.0135697	0.0177611	0.0166096	0.016249	0.0130878	0.0219732
PG 20:5_22:6	839.49	573.2	NEG		0.00683758	0.0173648	0.0196659	0.00648815	0.0179637	0.00575011	0.0170138	0.00542936	0.0236712	0.0246474	0.0204908	0.0249673	0.0174516	0.0131189	0.0143365	0.0330091	0.00592438	0.00528969	0.00605753	0.00637008	0.00763602	0.00903706	0.00507942	0.00820936
LPS 20:5	542.252	490.2	NEG		0.0102245	0.00594642	0.00353034	0.00758119	0.00277383	0.0152687	0.00206929	0.0120453	0.00441478	0.00521272	0.00118743	0.00294058	0.00263533	0.00135187	0.00282453	0.00310409	0.01317	0.0125814	0.0194472	0.0124582	0.0193166	0.0117539	0.0113388	0.0126928
1-Naphthalenepentanoic acid, 5-carboxy-1,2,3,4,4a,7,8,8a-octahydro-7-hydroxy-.beta.,1,2,4a-tetramethyl-	351.217	403.9	NEG	C20H32O5	0.113912	0.0392758	0.0575914	0.149911	0.0310767	0.0904574	0.0327978	0.117456	0.0363677	0.0402185	0.0535525	0.055326	0.0201503	0.0153031	0.0551738	0.017174	0.094053	0.13174	0.09782	0.14287	0.141761	0.131493	0.126551	0.108728
Cer 22:0;2O/42:0;(2OH)	974.988	346.4	NEG		0.000211501	0.000358474	0.000222884	1.133e-05	0.000511834	1.04944e-05	9.42397e-05	1.07512e-05	0.00104173	0.00131224	0.00126	0.000225192	0.000637735	0.000450505	0.0020971	0.00133494	5.70848e-05	0.00015381	9.44974e-05	1.0273e-05	7.35829e-05	7.9368e-05	0.000100934	6.71162e-05
3-[5-(4-Pyridinyl)-4H-1,2,4-triazol-3-yl]pyridine	224.092	304.3	POS	C12H9N5	0.0347297	0.0870566	0.103425	0.0261276	0.0640156	0.0693953	0.095462	0.0586251	0.0761923	0.0917312	0.10534	0.117762	0.123266	0.129773	0.092129	0.137092	0.0283233	0.0514844	0.0370313	0.0323953	0.043015	0.0352169	0.0512382	0.032133
Methylglycinate	90.055	95.3	POS		19.5578	5.29242e-05	5.15243e-05	16.8376	5.39152e-05	23.6201	5.39362e-05	32.4788	5.44938e-05	5.92265e-05	5.8753e-05	5.27635e-05	7.70197e-05	7.28558e-05	5.4507e-05	6.68387e-05	5.6829	20.6176	7.33301	6.24839	18.471	19.6893	15.2541	11.424
3-(3,4-Dimethoxyphenyl)-7-hydroxy-4-methylcoumarin	313.108	405	POS	C18H16O5	0.147701	0.0921546	0.0463036	0.0686859	0.0456592	0.0882261	0.0907052	0.0781309	0.0108504	0.0156809	0.00209597	0.0212628	0.00638341	0.00847239	0.00949831	0.0152894	0.0891116	0.0345526	0.0391123	0.0547867	0.0497824	0.0846887	0.0604999	0.0355168
(Methoxymethyl)(triphenyl)phosphonium cation	307.123	281.6	POS	C20H20OP	0.129381	0.0155152	0.0164935	0.0901228	0.0215532	0.0970263	0.0185231	0.144959	0.135314	0.145026	0.163324	0.165127	0.135271	0.138431	0.127235	0.173515	0.020802	0.0339615	0.0141124	0.0331588	0.0312049	0.0173791	0.0223509	0.0139787
(2-{[3-hydroxy-2-tetradecanamidooctadec-4-en-1-yl phosphonato]oxy}ethyl)trimethylazanium	733.551	203.7	NEG		0.0409473	0.0302591	0.0226452	0.0375179	0.0390072	0.0343884	0.0251695	0.0386805	0.0260123	0.0272149	0.0252798	0.0220431	0.026419	0.027817	0.022776	0.0284456	0.0425422	0.0375216	0.0308208	0.038538	0.0343354	0.0415803	0.0429875	0.0312388
2-Chloro-N-[3-(trifluoromethyl)phenyl]acetamide	238.025	189.3	POS	C9H7ClF3NO	0.0513386	0.0482595	0.0458191	0.0265817	0.0503117	0.0648204	0.0494514	0.0586662	0.078899	0.0919939	0.113338	0.110994	0.163374	0.1262	0.0802284	0.128519	0.0732245	0.062855	0.0651537	0.0697516	0.088265	0.0471211	0.0404219	0.0385333
LPI(18:2)	597.306	260.5	POS	C27H49O12P	0.0118161	0.00623463	0.00414474	0.00949993	0.00379419	0.0215248	0.00264053	0.01973	0.0328588	0.0438182	0.0462965	0.0307455	0.070653	0.0529395	0.0294065	0.0476126	0.0128465	0.0157996	0.0137429	0.0140751	0.00875391	0.00499975	0.0123614	0.00306868
DG 34:4	611.462	306.5	POS		0.00396704	0.0240344	0.0158106	0.00531307	0.00765488	0.0115325	0.00671249	0.013924	0.0692387	0.0786481	0.294426	0.256943	0.0903425	0.0365964	0.0550411	0.130206	0.00344841	0.00387276	0.0023378	0.00564096	0.00380521	0.00593468	0.00893746	0.00295649
1H-Pyrazolo[3,4-d]pyrimidin-4-amine, 1-phenyl-	212.092	298	POS	C11H9N5	0.0173026	0.00777835	0.00475001	0.0252639	0.00586982	0.0294034	0.00907785	0.0241849	0.00840885	0.00320552	0.00467736	0.00795168	0.00509672	0.00936435	0.00214961	0.00824602	0.0153413	0.0157419	0.0205855	0.0181785	0.0163739	0.0111575	0.0146177	0.0129388
4-(Pentafluorosulfanyl)aniline	220.02	407.6	POS	C6H6F5NS	0.023103	0.0302006	0.0377188	0.0225756	0.039622	0.0328002	0.031814	0.0315966	0.00896608	0.00944249	0.0133733	0.0152992	0.0080234	0.0329944	0.0087914	0.02037	0.0238553	0.0301527	0.0457631	0.0414657	0.0400667	0.0298263	0.0313812	0.0300049
1,3-Dipalmitoyl-sn-glycero-2-phosphoethanolamine	690.505	160.9	NEG	C37H74NO8P	0.0265274	0.0237908	0.0220322	0.0223638	0.029769	0.027226	0.0156248	0.0292112	0.0187691	0.0198601	0.0188654	0.0195846	0.0189419	0.0218387	0.0187395	0.0206121	0.0234536	0.0217481	0.0228438	0.0222403	0.0251986	0.0202683	0.0223826	0.0209371
4-Hexylresorcinol	195.138	102.1	POS	C12H18O2	0.0229485	0.0068332	0.0121346	0.0108019	0.00914279	0.0821366	0.00533062	0.0334973	0.0803167	0.0280447	0.0473846	0.0308656	0.218063	0.108427	0.0851027	0.0454778	0.0102214	0.0102235	0.0093142	0.0110367	0.00924774	0.00900733	0.00712832	0.0087104
PG 18:2_22:6	817.501	585.8	NEG		0.110124	0.195862	0.212577	0.171365	0.188018	0.108265	0.213012	0.130967	0.343025	0.290444	0.275929	0.272444	0.218572	0.252949	0.286374	0.22225	0.0976723	0.124627	0.107624	0.137071	0.113685	0.126175	0.0990349	0.147648
PG 18:2_20:5	791.489	583.9	NEG		0.0246323	0.0266198	0.0289314	0.0211624	0.0222838	0.0218207	0.0243227	0.022778	0.0317368	0.031636	0.0258199	0.028041	0.0218173	0.0291844	0.0296126	0.0327713	0.0184283	0.0177928	0.0156563	0.0186429	0.0195774	0.0220768	0.0145281	0.0261568
LPS 20:4	544.269	507.2	NEG		0.237606	0.129605	0.0863843	0.211215	0.0940589	0.304568	0.0628989	0.34004	0.111727	0.12684	0.0721714	0.0748796	0.0875549	0.0543704	0.110954	0.0470806	0.366592	0.425663	0.444483	0.425414	0.399092	0.368865	0.313432	0.416818
1H-Pyrrole-2,5-dione, 3-(2,4-dichlorophenyl)-4-(1-methyl-1H-indol-3-yl)-	371.037	73.2	POS	C19H12Cl2N2O2	0.000668362	0.091408	0.087222	4.99561e-05	0.0783164	7.48979e-05	0.104584	7.30172e-05	0.198004	0.142106	0.154342	0.173187	0.0866588	0.125105	0.068066	0.0822519	0.000282994	0.0308079	0.000420161	5.16627e-05	0.00124869	0.00318921	0.00808316	4.70934e-05
Lys-Leu	260.197	538.5	POS	C12H25N3O3	0.460869	0.151366	0.16247	0.283999	0.121342	0.4569	0.151976	0.49783	0.411831	0.5677	0.497893	0.489298	0.761672	0.713557	0.472368	0.631295	0.339916	0.318411	0.176775	0.261547	0.158408	0.210579	0.233806	0.134397
Zearalenone_4-sulfate	399.113	287.6	POS		0.00961108	0.00208371	0.000633817	0.000526934	0.0011593	0.00912006	0.000609008	0.0089293	0.00917928	0.0114999	0.011728	0.00798619	0.0204464	0.016023	0.00883432	0.0125129	0.00234005	0.00417378	0.00160405	0.000822696	0.00120949	0.000902267	0.00285592	0.00197253
3-{3-oxo-2H,3H-[1,2,4]Triazolo[4,3-a]pyridin-2-yl}propanoic acid	208.072	184.6	POS	C9H9N3O3	0.0540435	0.00717375	0.0037316	0.0668064	0.00414298	0.0945679	0.00379505	0.0811501	0.288885	0.309897	0.24125	0.273831	0.3104	0.358121	0.290487	0.339405	0.0642758	0.075573	0.0388323	0.0586841	0.0802888	0.00641895	0.00434931	0.00192391
14-Hydroxy-4Z,7Z,10Z,12E,16Z,19Z-docosahexaenoic acid	343.228	34	NEG	C22H32O3	0.653596	0.334851	0.111718	0.864948	0.349044	1.26034	0.164923	0.780603	0.28833	0.305475	0.146744	0.162399	0.167269	0.120366	0.183837	0.100259	1.10904	0.769338	1.39435	0.979196	1.54265	1.2468	1.08083	1.29593
LPC(O-22:1)	564.439	211.5	POS	C30H62NO6P	0.0442592	0.0182282	0.0109491	0.0784671	0.0246174	0.0769478	0.0316791	0.0554004	0.0910562	0.151899	0.112774	0.103944	0.107864	0.128046	0.107342	0.113467	0.0703398	0.0403263	0.018594	0.0345292	0.00700516	0.0505308	0.0722376	0.0120951
PG 32:0	721.496	614.9	NEG		0.00983446	0.00651235	0.00655894	0.00762469	0.00767043	0.00637401	0.00578184	0.00885164	0.00447706	0.00479868	0.00412201	0.00447788	0.00443039	0.00474428	0.00482165	0.00423473	0.00672688	0.0164854	0.0071065	0.0073934	0.00812246	0.0075801	0.00849704	0.00775759
PG 18:3_22:6	815.49	577.3	NEG		0.00542946	0.0111417	0.0124388	0.00610058	0.00899416	0.00526605	0.0114396	0.00592189	0.0125556	0.0143632	0.0108035	0.0127165	0.00902937	0.0112118	0.0125085	0.0176763	0.00374409	0.0046394	0.00425936	0.00508823	0.00531546	0.00583255	0.00344061	0.00509834
irigenin	361.088	398	POS	C18H16O8	0.0147652	0.0429186	0.0567561	0.0479248	0.0528169	7.48979e-05	0.0428615	7.30172e-05	0.0145481	5.92265e-05	0.00146986	0.0024403	7.70197e-05	7.28558e-05	0.00508276	6.68387e-05	0.051512	0.0342371	0.0364496	0.0272816	0.0123283	0.0752745	0.0272841	0.043903
6-(6-Aminohexanamido)hexanoic acid	245.186	360.2	POS	C12H24N2O3	5.64709e-05	0.0293423	0.0365728	4.99561e-05	0.036179	7.48979e-05	0.0294464	7.30172e-05	5.44938e-05	5.92265e-05	5.8753e-05	5.27635e-05	7.70197e-05	7.28558e-05	5.4507e-05	6.68387e-05	0.0167698	0.0226686	0.00899854	0.0110922	0.00819252	0.0188339	0.0152512	0.02698
N-Lauroyl-D-erythro-sphingosylphosphorylcholine	647.516	205.6	POS	C35H71N2O6P	0.0444102	0.0176904	0.017702	0.0373242	0.0192785	0.0390088	0.0137084	0.0575767	0.0549453	0.0601467	0.0489585	0.0406839	0.0568331	0.0561228	0.0607681	0.0566361	0.0262638	0.0264793	0.0140552	0.0202684	0.0165769	0.0162658	0.0179297	0.00901532
N-[3-[(4aS,7aS)-2-Amino-4,4a,5,7-tetrahydrofuro[3,4-d][1,3]thiazin-7a-yl]-4-fluorophenyl]-5-fluoropicolinamide	391.103	266.9	POS	C18H16F2N4O2S	0.0019693	0.000170571	5.15243e-05	0.00123189	5.39152e-05	0.00446991	5.39362e-05	0.00411751	0.00194143	0.00317893	0.00376385	0.00234904	0.00520627	0.00560461	0.00320417	0.00359887	0.000767578	0.0018496	0.00064455	0.000443914	5.03447e-05	5.25157e-05	0.000659785	4.70934e-05
4-Amino-8-(trifluoromethyl)quinoline	213.062	79.1	POS	C10H7F3N2	0.0679276	0.13515	0.0998234	0.319609	0.101371	7.48979e-05	0.091123	7.30172e-05	5.44938e-05	0.00351105	5.8753e-05	5.27635e-05	0.002369	7.28558e-05	0.00656091	6.68387e-05	0.0680761	0.0759906	0.0719006	0.0858625	0.0599283	0.122314	0.120649	0.0948489
1-Methyl-1H-pyrazole-5-carbaldehyde	111.055	70.1	POS	C5H6N2O	1.96683	0.989738	0.771374	0.889639	0.863451	2.6868	0.760675	2.12704	2.69314	3.02053	3.49813	2.16917	4.32448	3.22045	2.74152	3.10115	2.49636	2.16156	1.90274	1.77424	1.42316	1.01117	1.35557	0.720349
PG 18:0_22:6	821.531	627.9	NEG		0.00444778	0.00416688	0.0134662	0.0260294	1.60184e-05	0.0137063	0.0043317	0.0069742	0.0295498	0.0276607	0.0184725	0.0208956	0.0150422	0.0161858	0.0160522	0.0158217	0.00175851	0.00344192	0.00213618	0.00448306	0.00373077	0.00433646	0.0047468	0.00609986
5-Bromo-4-isopentylpyrimidine	229.032	63	POS	C9H13BrN2	0.217425	0.420417	0.463879	0.0488766	0.404987	0.0794197	0.466912	0.0184936	0.400317	0.426585	0.419865	0.523084	0.48083	0.629341	0.426924	0.497589	0.147594	0.0915414	0.196195	0.221836	0.0625107	0.0601897	0.117445	0.12035
2-Mercapto-6-trifluoromethylthiazolo[4,5-b]pyridine	236.978	462.6	POS	C7H3F3N2S2	0.0392845	0.00404972	0.00224403	0.0121006	0.00218346	0.0482432	0.00507809	0.0551022	0.043468	0.050502	0.0443709	0.0389629	0.0468246	0.0446963	0.0340376	0.0492372	0.00311292	0.00376164	0.00278275	0.00308443	0.00150369	0.00590504	0.00904992	0.00308734
4-[4-(Trifluoromethoxy)phenoxy]piperidine	262.104	439.7	POS	C12H14F3NO2	0.60521	0.108885	0.0908088	0.0816721	0.0828846	0.633661	0.105413	0.549979	0.510969	0.651346	0.641572	0.524245	1.0615	0.878261	0.575668	0.579601	0.106298	0.136119	0.0613571	0.0790665	0.0777874	0.109784	0.129557	0.078025
Polyoxyethylene_(600)_mono-_ricinoleate	341.305	218.4	POS		0.0164733	0.0132048	0.0107447	0.0162654	0.0115175	0.0284092	0.010622	0.0204321	0.0236202	0.0195801	0.0213035	0.0148661	0.0234324	0.0262655	0.0217199	0.0203452	0.0111352	0.0154659	0.0112132	0.00881051	0.00982064	0.012516	0.0170823	0.0128048
LPS 20:1	550.316	551.5	NEG		0.00144041	0.00255719	0.0002938	0.00108257	0.000858593	0.00233975	0.000384688	0.00130692	0.000124235	9.41946e-05	0.000409994	0.000270821	0.000270526	0.000375794	0.00059971	0.000605738	0.00105461	0.0013268	0.00233466	0.00181821	0.00208734	0.00165522	0.00196053	0.00183527
Ilicicolin H	432.221	512.2	NEG	C27H31NO4	0.00341636	0.00691872	0.0094266	0.00477263	0.00744974	0.000240746	0.00649209	0.00201777	0.0581056	0.0738567	0.0542	0.0430231	0.0483766	0.00398655	0.00445566	0.00737977	0.00317017	0.00108383	0.000114642	0.00167306	0.000129993	0.00201529	0.00221359	0.00229671
.alpha.-Cyclohexylmandelic acid	233.119	390	NEG	C14H18O3	0.0128029	0.00882074	0.0120763	0.0188072	0.00710186	0.00773342	0.00341728	0.0135552	0.00854068	0.00807934	0.00576889	0.00651253	0.00241078	0.00271379	0.00798489	0.00230855	0.0173605	0.0200303	0.0159116	0.0147833	0.0188353	0.0172927	0.0174967	0.0179013
2-Amino-7-phenyl-7,8-dihydro-5(6H)-quinazolinone	240.111	540.5	POS	C14H13N3O	0.0271794	0.181157	0.172414	0.133502	0.191709	0.00638991	0.240315	0.00438885	0.0249107	0.00585907	0.00795497	0.0129228	0.00451778	0.00724862	0.0192852	0.00901933	0.0606669	0.0445277	0.0707038	0.0727723	0.0435066	0.138867	0.0521855	0.102396
Arg-Asp	290.147	466.9	POS	C10H19N5O5	0.0434234	0.0223253	0.0201244	0.0174686	0.0219625	0.0204379	0.0124462	0.0175488	0.0374474	0.0476282	0.043522	0.0363809	0.0416998	0.0330694	0.0565657	0.0352011	0.026628	0.0228354	0.0237395	0.0261194	0.0162524	0.0137765	0.0225565	0.0137366
Bathophenanthroline	333.141	438.2	POS	C24H16N2	0.00961766	0.00184244	0.00369695	0.0194046	0.00396181	0.0374212	0.00377921	0.0304631	0.0461738	0.0560867	0.0484214	0.0459966	0.0536089	0.0403258	0.0528135	0.0514959	0.0073536	0.00512307	0.00527376	0.00669646	0.0076104	0.00217089	0.00189636	0.00222334
N-Acetyl-D-galactosaminitol	224.114	268.4	POS	C8H17NO6	0.0206096	0.0726485	0.0663995	0.0182715	0.0482942	0.0162078	0.0574351	0.0224436	0.0161637	0.0180163	0.0128407	0.0139535	0.0268024	0.0237213	0.0169852	0.0222647	0.0475889	0.0529453	0.0318341	0.0370939	0.0273887	0.0509056	0.0381482	0.0298737
LPE(P-20:0)	494.362	204.6	POS	C25H52NO6P	0.111874	0.101957	0.0772783	0.0881604	0.100666	0.182081	0.0863083	0.17647	0.240019	0.222055	0.190167	0.159979	0.266168	0.242704	0.208634	0.184788	0.130571	0.126042	0.10869	0.126636	0.0989074	0.0965453	0.156973	0.0761202
N,N-Diethylcathinone	206.152	578.6	POS	C13H19NO	0.343419	0.219464	0.193013	0.375775	0.191922	0.492789	0.190876	0.452314	0.34394	0.481961	0.438802	0.440115	0.589553	0.425041	0.4309	0.473084	0.389311	0.303898	0.170441	0.242583	0.38376	0.19973	0.294987	0.164631
Ethyl 8-chloro-2H-[1,3]dioxolo[4,5-g]quinoline-7-carboxylate	280.036	416.7	POS	C13H10ClNO4	0.0166885	0.0801637	0.0704855	0.130872	0.0722409	0.0029384	0.124766	0.00265497	0.0138014	0.00328331	0.00515716	0.00947541	0.00192852	0.00424724	0.0100643	0.00556007	0.0417542	0.0246571	0.0178428	0.0223892	0.00968302	0.0656288	0.0172685	0.0326349
Etofylline	225.1	399.7	POS	C9H12N4O3	0.0214176	0.0982578	0.0859247	0.108822	0.101899	0.00413113	0.126872	0.00152435	0.018103	0.00366006	0.00200658	0.0107916	0.00341625	0.00539044	0.0131106	0.00521239	0.0534349	0.0350871	0.0345509	0.0265219	0.0145801	0.0807208	0.0228555	0.0321872
1-Methyl-1H-pyrazolo[3,4-d]pyrimidin-4-ol	149.046	311.6	NEG	C6H6N4O	0.0135699	0.00615011	0.00502391	0.0181235	0.0137096	0.0179294	0.00553157	0.0177463	0.00166358	0.00317183	0.00348181	0.00298738	0.00322605	0.00294223	0.00228068	0.00288082	0.0108698	0.0103194	0.0132586	0.0101412	0.0228085	0.00814679	0.0117234	0.00882985
Adapalene	411.193	179.8	NEG	C28H28O3	0.012165	0.00540372	0.00446814	0.0124448	0.00464543	0.00884085	0.0019188	0.0129591	0.00225498	0.00224713	0.00174496	0.00231617	0.00134329	0.000611001	0.00196364	0.000483936	0.00762329	0.00969649	0.00929095	0.00960639	0.00825917	0.00876178	0.00844918	0.0100543
PC O-17:0_22:6	850.598	534	NEG		0.0189747	0.0112134	0.00804312	0.0246636	0.0087794	0.0267876	0.00808236	0.0231301	0.0100165	0.010884	0.00687827	0.00710472	0.00720624	0.00657318	0.0117608	0.00858072	0.0221291	0.0186804	0.0159237	0.0173925	0.0207179	0.0162873	0.0214556	0.0179473
Lys-Glu	276.156	468	POS	C11H21N3O5	0.0564697	0.0171957	0.0192973	0.0316824	0.0185759	0.033432	0.00607076	0.022877	0.0696217	0.0943683	0.0660707	0.0489813	0.0592334	0.0754029	0.108936	0.0628188	0.0242427	0.0266941	0.0256475	0.0244462	0.0143841	0.00705145	0.0209928	0.00851661
Cyclocytidine	226.084	399	POS	C9H11N3O4	2.92342	13.3368	15.8037	16.6685	13.9992	0.526686	18.3577	0.377843	2.27139	0.499998	0.877601	1.35377	0.585151	0.797128	1.62583	1.05298	6.79572	4.59036	5.15389	5.22223	2.19594	12.3593	3.63066	6.48147
N-Arachidonylmaleimide	370.277	52.8	POS	C24H35NO2	0.056166	0.00650523	5.15243e-05	0.00522588	0.00482516	0.0818198	5.39362e-05	0.0639625	0.0565664	0.0747087	0.100607	0.0544581	0.0893089	0.0946056	0.0645668	0.086311	4.93441e-05	5.19611e-05	4.99853e-05	5.16627e-05	5.03447e-05	5.25157e-05	0.103893	0.0143847
N-Arachidonoyltaurine	412.25	581.5	POS	C22H37NO4S	0.0380894	0.00310758	0.00146781	0.00603546	0.00344314	0.0641838	0.00147972	0.0490704	0.0532572	0.0718042	0.0748072	0.0546845	0.0656795	0.0765408	0.0785237	0.0595258	0.00923312	0.016919	0.0149714	0.0117221	0.00068151	0.00347225	0.013147	0.00632698
4-Methoxyacridin-9-ol	226.084	417.5	POS	C14H11NO2	0.211869	0.733237	0.727014	1.2667	0.743723	0.0428107	0.887284	0.0380329	0.115157	0.0418796	0.0634453	0.0753385	0.0465343	0.0590978	0.0864668	0.0830347	0.296752	0.224981	0.234958	0.265405	0.100587	0.622021	0.163376	0.302337
Topiramate	362.085	398	POS	C12H21NO8S	0.0895459	0.172972	0.284031	0.192008	0.24529	0.0199833	0.17259	0.0118772	0.065803	0.021641	0.0311104	0.0324588	0.0300592	0.0315318	0.0477211	0.0377762	0.167847	0.140945	0.116888	0.143039	0.0719898	0.2562	0.106629	0.17072
Carbadox	263.077	380.3	POS	C11H10N4O4	0.0805721	0.357908	0.375803	0.428291	0.383374	0.00116546	0.567302	0.00182412	0.0539482	5.92265e-05	5.8753e-05	0.0141593	0.00173488	0.00100253	0.0307667	6.68387e-05	0.160825	0.112637	0.134442	0.137484	0.0608846	0.315885	0.094168	0.182403
Pteroside_B	381.189	117.7	POS		5.64709e-05	0.0476619	0.0739578	0.0526379	0.0289098	7.48979e-05	0.0879367	7.30172e-05	5.44938e-05	5.92265e-05	5.8753e-05	5.27635e-05	7.70197e-05	7.28558e-05	5.4507e-05	6.68387e-05	0.0856147	0.0737434	0.0874703	0.0411984	0.0592047	0.233247	0.10974	0.129024
1-Linoleoylglycerol	279.197	52.9	NEG	C21H38O4	0.780013	0.253065	0.225529	0.78586	0.269276	0.318671	0.200595	0.417751	0.143634	0.232501	0.116986	0.117043	0.183105	0.0865082	0.1057	0.0631214	0.630087	0.530451	0.440672	0.453276	0.273277	0.330029	0.402728	0.436354
PI 16:0_17:2	819.51	585	NEG		0.0150098	0.0271083	0.0292562	0.0235766	0.0248625	0.0148874	0.0319739	0.017296	0.0443277	0.0401024	0.0392509	0.031857	0.0258349	0.0389801	0.0441898	0.0385493	0.0115097	0.0157057	0.0102643	0.0192525	0.0143955	0.016758	0.0104966	0.0180469
PI 4:0_18:3	663.321	347.1	NEG		1.07001e-05	0.00150422	0.00257655	6.41294e-05	0.000804436	1.04944e-05	0.000782552	1.07512e-05	0.00282849	0.00324683	0.00228163	0.00176502	0.00226325	0.00159606	0.00228244	0.00196083	1.05569e-05	1.04726e-05	1.05372e-05	1.0273e-05	1.06324e-05	1.05762e-05	1.05308e-05	1.04568e-05
Thieno[2,3-b]pyridine-5-carbonitrile, 6,7-dihydro-4-hydroxy-3-(2'-hydroxy[1,1'-biphenyl]-4-yl)-6-oxo-	361.068	445.5	POS	C20H12N2O3S	0.0152646	0.224265	0.262227	0.0304524	0.196087	0.00713086	0.226905	0.0133676	0.00496362	0.0270789	0.0112988	0.00892072	0.018443	0.0229548	0.0183601	0.0296627	0.200292	0.415028	0.200424	0.189434	0.189672	0.203892	0.151472	0.158649
Aspartyl-Alanine	205.082	437.7	POS	C7H12N2O5	0.107842	0.0490945	0.0279005	0.0536215	0.0450037	0.150647	0.0394765	0.0923795	0.0985976	0.0918365	0.213051	0.139042	0.248229	0.252364	0.125992	0.121663	0.0462116	0.0319989	0.0195786	0.0308675	0.0115093	0.0430226	0.106907	0.0358994
Neryl_glucoside	317.194	409.3	POS		0.0546529	0.00734433	0.00714853	0.0169836	0.00803834	0.0339869	0.00310671	0.0302041	0.0718466	0.0918962	0.0811117	0.0544581	0.0864175	0.105618	0.0980258	0.0714506	0.0107091	0.0120472	0.00764413	0.00880049	0.00303139	0.00340607	0.0112042	0.00416903
2-Hydroxy-3-(trifluoromethoxy)benzoic acid	221.005	395.2	NEG	C8H5F3O4	0.00267439	0.00353793	0.00349198	0.00280892	0.00557706	0.00495857	0.00380301	0.00481588	0.00522738	0.00584446	0.00444379	0.00551309	0.00854099	0.00633469	0.00724209	0.00666491	0.00391389	0.00381649	0.0036696	0.00521797	0.00355256	0.00347064	0.00354226	0.00414559
Homatropin	276.156	384.6	POS	C16H21NO3	0.0872873	0.0222738	0.0248699	0.0440093	0.014496	0.0913913	0.0192802	0.0704977	0.121507	0.222367	0.197769	0.342897	0.344852	0.314673	0.175582	0.384671	0.0515861	0.073152	0.0329779	0.0457063	0.0339795	0.0120518	0.0115831	0.0154839
Methyldopate	240.121	293.9	POS		0.0294959	0.0231154	0.0236456	0.063521	0.0182844	0.0214002	0.0175514	0.051577	0.0548381	0.059012	0.0719359	0.0678285	0.0515324	0.0602523	0.0558877	0.0735217	0.0165482	0.015307	0.0125452	0.017345	0.0112931	0.0148652	0.0177295	0.0137779
N-Butyl-1-phenyl-1H-pyrazolo[3,4-d]pyrimidin-4-amine	268.153	257	POS	C15H17N5	0.00857981	0.0106834	0.00403694	0.0114974	0.0035925	0.0140835	0.00808701	0.013092	0.0604511	0.0557638	0.0469902	0.0455487	0.0425838	0.0431763	0.0576497	0.04521	0.00997889	0.00955195	0.00578432	0.00623772	0.0059636	0.00980525	0.0142735	0.00398727
6-Keto-PGF1alpha	369.229	221.5	NEG		0.50888	0.104604	0.0958075	0.168256	0.131945	0.30053	0.086306	0.379199	0.0955826	0.142648	0.0988765	0.104337	0.0357502	0.0508067	0.0953869	0.0581638	0.309261	0.388221	0.346485	0.340026	0.332854	0.306528	0.323483	0.339439
N-[(4E,8E)-1,3-dihydroxyoctadeca-4,8-dien-2-yl]hexadecanamide	536.506	30.6	POS	C34H65NO3	1.87052	1.0608	0.799503	1.26867	1.21124	2.95567	0.970192	2.96507	2.83454	2.07649	2.17869	2.01093	4.2849	4.1844	3.16279	2.57105	1.19692	1.80092	1.28291	1.14034	1.06184	0.993763	1.3705	1.08384
4-Hydroxy-N-desmethyltamoxifen	374.216	460.9	POS		0.0629206	0.00606957	0.00682141	0.0235236	0.00457259	0.0630285	0.00411256	0.0795636	0.074113	0.0753452	0.0721946	0.0665139	0.151538	0.335605	0.0922342	0.110634	0.00573717	0.0186862	0.00668632	0.0105119	0.00118406	0.00261648	0.00880735	0.00374591
LTC4-[d5]	629.32	477	NEG		0.231579	0.0973691	0.0952493	0.265325	0.0952389	0.271611	0.0898092	0.182835	0.109076	0.129902	0.0685251	0.0654084	0.0849466	0.0861491	0.113031	0.0885373	0.337404	0.196585	0.210278	0.200485	0.280644	0.234335	0.311166	0.263433
PC(20:3(8Z,11Z,14Z)/P-18:0)	796.62	36.3	POS	C46H86NO7P	2.70772	1.36635	0.950214	2.25949	1.08091	2.34273	1.34371	2.83063	1.69446	2.68518	2.86648	2.32388	2.81972	2.73716	2.60231	2.40137	1.52739	1.18041	1.03131	1.49542	1.38696	1.7057	1.7184	1.07834
Purpurin	257.047	189.4	POS	C14H8O5	0.0596332	0.0532733	0.0436497	0.0376734	0.0446589	0.0909022	0.0474602	0.079995	0.492353	0.819539	0.877208	1.26416	1.51836	0.827421	0.648816	1.30878	0.277807	0.192614	0.0939482	0.166204	0.40328	0.045208	0.0441465	0.0380208
PS 22:2_22:5	888.575	486.2	NEG		0.00422408	0.00110743	0.000355206	0.0042808	0.000251188	0.00626644	0.000502647	0.00379804	0.000169808	0.00029111	8.50598e-05	1.1326e-05	1.16419e-05	7.61143e-05	0.000931502	0.000354769	0.00413129	0.00380163	0.00622835	0.00605593	0.00741243	0.00705164	0.00408257	0.00761944
1,2,4-Benzenetriol	127.039	95.3	POS	C6H6O3	0.887781	0.0321599	0.0464614	0.695358	0.0379967	0.933239	0.0350225	1.30168	0.0356778	0.0449621	0.0424389	0.0328211	0.0539153	0.0532825	0.0384983	0.0452393	0.168078	0.953184	0.327441	0.19927	0.886311	1.01053	0.739768	0.591391
Fluticasone_propionate	501.198	398.6	POS		0.0325681	0.292315	0.371237	0.454535	0.255612	0.00660976	0.396503	0.00708065	0.0232647	0.00684617	0.00904507	0.0124963	0.0184783	0.00890022	0.0118594	0.0108968	0.0928449	0.0475128	0.0577408	0.0597828	0.0119872	0.212762	0.0307141	0.0446593
MGDG O-17:2_22:6	843.552	628.3	NEG		0.00848169	0.0114253	0.0110915	0.00863552	0.0139579	0.0146801	0.0105825	0.0085385	0.0155457	0.0176866	0.0161172	0.0180396	0.020741	0.0148306	0.0151061	0.0173823	0.0100773	0.0109049	0.0103535	0.010416	0.0109895	0.0144107	0.0125887	0.0102578
5-Chloro-2-(2-chloroethyl)-1H-benzimidazole	215.017	44.6	POS	C9H8Cl2N2	0.235232	0.632284	0.630214	0.0999825	0.557455	0.147833	0.630893	0.0693493	0.504789	0.63471	0.534364	0.382414	0.646613	0.896574	0.622152	0.732791	0.163338	0.078192	0.209671	0.223249	0.1173	0.104482	0.116157	0.107209
4-Chloro-N-(5-fluoro-2-methylphenyl)benzamide	264.061	416.7	POS	C14H11ClFNO	0.0932583	0.399175	0.372797	0.516925	0.411151	0.0198322	0.610557	0.0165346	0.0780821	0.0179554	0.0298892	0.0464898	0.0180986	0.0242929	0.0536995	0.0282201	0.187329	0.12919	0.13516	0.150107	0.0706881	0.350268	0.114514	0.218249
Nimbidiol	275.161	358.1	POS	C17H22O3	0.072978	0.0397814	0.0312189	0.128601	0.026958	0.117361	0.0293769	0.101719	0.383247	0.428254	0.451106	0.467759	0.5126	0.434993	0.402441	0.520309	0.129834	0.138357	0.0984277	0.180391	0.132327	0.0521853	0.0596002	0.0482968
N-Benzyladenine	226.106	318.1	POS		0.420126	0.249596	0.186703	0.499829	0.193976	0.445155	0.198425	0.440774	0.388191	0.642351	0.450773	0.518022	0.641738	0.682074	0.511181	0.57644	0.204334	0.245671	0.148218	0.257296	0.207073	0.199656	0.216969	0.140283
1H-Pyrrole-2,5-dione, 1-[6-[[(17.beta.)-3-methoxyestra-1,3,5(10)-trien-17-yl]amino]hexyl]-	465.317	209.2	POS	C29H40N2O3	0.766933	0.363006	0.274914	0.243776	0.273765	0.9087	0.218426	0.944607	1.28488	1.01249	0.813804	0.711771	1.43263	1.00684	1.21369	0.768108	0.345148	0.394722	0.219682	0.236649	0.183303	0.322978	0.598056	0.199997
PG O-17:2_22:5	791.52	639.3	NEG		0.00912168	0.0117075	0.0140075	0.00949113	0.0155839	0.0111958	0.0110973	0.0134688	0.0135406	0.0150038	0.0191387	0.0138032	0.018845	0.0235409	0.0184353	0.0154277	0.0092956	0.00932912	0.0102989	0.0126781	0.00944119	0.00809864	0.00995838	0.00803358
2-Chloro-8-methyl-3-quinolinecarbaldehyde	206.034	96	POS	C11H8ClNO	0.842884	0.00815862	0.0121232	0.726716	0.00867057	1.06137	0.00466149	1.16028	0.0083278	0.00767826	0.00464714	0.00651817	0.0137645	0.00998915	0.00482947	0.00782293	0.51149	0.712724	0.580566	0.551601	0.689277	0.803486	0.702229	0.610566
Glu-Gln	276.12	44.5	POS	C10H17N3O6	0.132943	0.261017	0.146443	0.0135763	0.154543	0.0901128	0.12119	0.163628	0.334956	0.392671	0.138626	0.184095	0.237134	0.222383	0.358249	0.2335	0.038907	0.0784204	0.0569736	0.0728419	0.0473879	0.0702533	0.00952637	0.069597
4-(5-Amino-1,3,4-thiadiazol-2-yl)benzoic acid	222.03	494.7	POS	C9H7N3O2S	0.324267	0.292504	0.262833	0.379822	0.280148	0.383146	0.317832	0.378491	0.30776	0.387828	0.378356	0.374519	0.450566	0.387758	0.364524	0.39293	0.326596	0.308314	0.241084	0.273914	0.150214	0.240682	0.218789	0.2153
Arg-Met	306.155	419.3	POS	C11H23N5O3S	0.018426	0.00387866	0.00372122	0.0116866	0.00331167	0.0231302	0.0034138	0.0343918	0.0312503	0.0577045	0.0382794	0.0356488	0.0518044	0.0494581	0.0462106	0.0477036	0.0144303	0.0162018	0.00623745	0.00726865	0.015108	0.00311806	0.00341966	0.00184661
PC O-48:12	920.64	584.6	POS		0.0470473	0.092598	0.0914355	0.0670749	0.0582843	0.12646	0.0827831	0.0723882	0.142933	0.1664	0.132877	0.126511	0.126659	0.158329	0.133266	0.22967	0.0434989	0.0501997	0.0445439	0.0512177	0.0421115	0.0596873	0.0451235	0.0550091
Octyl gallate	281.144	455.7	NEG	C15H22O5	0.00194409	0.00520343	0.00403777	0.000558973	0.00432463	0.00521799	0.00522151	0.00382202	0.00511726	0.00531891	0.0057372	0.00605558	0.00513732	0.0053508	0.00676796	0.00509053	0.00348781	0.00267663	0.00397577	0.00427792	0.00440858	0.00454362	0.00445309	0.00367938
4,6-Pyrimidinediamine, 2-[1-[(2-fluorophenyl)methyl]-1H-pyrazolo[3,4-b]pyridin-3-yl]-5-(4-morpholinyl)-	421.196	436.6	POS	C21H21FN8O	0.00574857	0.0723363	0.0917936	0.00325108	0.0329302	0.00499187	0.0630131	0.00501192	0.0825233	0.105516	0.0438916	0.0814497	0.0173571	0.124119	0.0945917	0.0841813	0.00714277	0.0116413	0.00227956	0.00287031	0.0112089	0.00608448	5.2198e-05	0.00536792
Indole-3-butyric acid	204.105	303.7	POS	C12H13NO2	0.00245211	0.0100806	0.00590837	0.00481865	0.00219322	0.00890124	0.00235565	0.00632348	0.0380215	0.0505105	0.0166307	0.0248356	0.0536862	0.00398223	0.0310511	0.0155492	0.00296792	0.00919835	0.00358676	0.0010858	0.00894859	0.00743321	0.00551489	0.00222448
Methylacetate	73.0296	75.9	NEG		0.0180769	0.0197524	0.018404	0.016542	0.0300883	0.0173854	0.0396834	0.018245	0.0501393	0.0745132	0.0452083	0.0537462	0.104474	0.0521752	0.0421162	0.0630645	0.0349457	0.0332808	0.0338907	0.0364036	0.0182453	0.0305332	0.0389636	0.0311425
2-Amino-4-chloro-6-nitrophenol	189.007	50	POS	C6H5ClN2O3	0.38995	0.390127	0.305521	0.335213	0.33813	0.512145	0.351307	0.479831	0.481924	0.476133	0.412716	0.330149	0.521042	0.57194	0.458802	0.535718	0.318297	0.287618	0.299664	0.240236	0.320601	0.268159	0.323347	0.197414
Huperzine A	243.144	521.7	POS	C15H18N2O	0.326033	0.235481	0.197905	0.434966	0.20348	0.500303	0.213708	0.470405	0.393049	0.447237	0.427556	0.407435	0.580298	0.468178	0.427374	0.454116	0.419687	0.325909	0.183842	0.240014	0.351331	0.230343	0.238143	0.151088
3-Methyl-1-(4-nitrophenyl)-1H-pyrazol-5-ol	220.067	402.7	POS	C10H9N3O3	0.0250755	0.00894622	0.0154942	0.00540029	0.00668576	0.0498055	0.00949766	0.0351958	0.0550229	0.0487773	0.0722659	0.0457546	0.129052	0.0805311	0.0553698	0.0870959	0.0109089	0.0106311	0.00827109	0.00935163	0.0048637	0.00414527	0.00586417	0.00132207
4-(Trifluoromethyl)pyridine	148.043	380.6	POS	C6H4F3N	2.6274	0.912056	0.62919	0.800956	0.690966	2.31192	0.76363	2.54175	1.58751	2.29479	2.23556	1.79503	2.73055	2.80281	1.87902	2.28485	0.759144	0.830447	0.582709	0.522708	0.412762	0.727059	1.10672	0.625516
4-Allyl-3-(4-chlorobenzyl)-1H-1,2,4-triazole-5-thione	266.056	346.9	POS	C12H12ClN3S	0.172814	0.0140522	0.00677041	0.0142916	0.00772713	0.256797	0.00833477	0.286285	0.172629	0.2072	0.201187	0.164783	0.361333	0.394294	0.182288	0.216021	0.023079	0.0384183	0.0108444	0.0112986	0.00858297	0.0206727	0.0468724	0.0179831
2-Chloro-N-(3,4-difluorophenyl)acetamide	206.023	346.4	POS	C8H6ClF2NO	0.0251652	0.00152358	0.00157441	0.0017269	0.00511911	0.0382133	0.0014136	0.0449483	0.0246934	0.0309902	0.0310942	0.0261853	0.0578123	0.0557408	0.0274848	0.0338422	0.00141376	0.00115384	0.00319766	0.00207693	0.00227856	0.00199331	0.00482491	0.00163683
2-Fluoro-4-biphenylylboronic acid	215.065	280.4	NEG	C12H10BFO2	0.00487921	0.00563006	0.000833762	0.00985206	0.00752946	0.00491676	0.00714648	0.0021369	0.00141614	0.00497342	0.0016576	0.00104534	0.000985766	0.00120437	0.00199169	0.00132823	0.0102066	0.0109736	0.0102649	0.00952486	0.0114117	0.00524643	0.0112404	0.0103077
Magnolol	267.142	260.7	POS	C18H18O2	0.00469241	0.0113953	0.0120073	0.0122495	0.00901477	0.0139788	0.00725113	0.0153415	0.0146272	0.0137624	0.0162059	0.0170137	0.0275625	0.0155016	0.0134505	0.01628	0.0045347	0.00347547	0.00136423	0.00293607	0.00104027	0.0113834	0.00163901	0.012294
6-Fluoro-2,3,4,9-tetrahydro-1H-carbazole	190.098	258.9	POS	C12H12FN	0.0304566	0.326942	0.296382	0.0649619	0.459353	0.00338619	0.366799	0.00244212	0.00696287	0.00178032	0.0112238	0.0225342	0.00272598	0.0352116	0.00413246	0.033627	0.249084	0.188825	0.181396	0.0987364	0.104072	0.0875668	0.0488208	0.0641372
Androstan-4,6-diene-17.beta.-ol-3-one	287.205	228.1	POS	C19H26O2	0.0138577	0.0571844	0.0605756	0.0229966	0.053419	0.0206564	0.0548939	0.0253748	0.0109927	0.0104452	0.0103928	0.0108067	0.0161083	0.0148471	0.0100535	0.0136577	0.0579866	0.0354856	0.0338837	0.042427	0.052841	0.0389508	0.0472585	0.0576464
6-Hydroxy-2,2'-bipyridine-5-carbonitrile	198.062	189.9	POS	C11H7N3O	0.451354	0.578219	0.317672	1.66263	0.514581	0.00758973	0.478755	0.0125677	0.0553131	0.109863	0.0110259	0.00188651	0.00177905	0.0651984	0.0925497	0.00930548	0.487105	0.554038	0.392702	0.463153	0.301173	0.557026	0.598083	0.471438
2-Methoxyacridin-9-ol	226.083	184.6	POS	C14H11NO2	1.9233	0.251612	0.16901	1.42527	0.175305	3.12435	0.151637	2.6722	9.40609	9.47554	7.3755	8.61697	10.1737	11.5147	9.17859	11.0857	1.94889	2.30931	1.32052	1.98561	2.69203	0.126693	0.18086	0.090575
N-(3-Pyridinyl)nicotinamide	200.078	167.9	POS	C11H9N3O	0.0757512	0.099314	0.072356	0.251171	0.0843249	7.48979e-05	0.0779812	7.30172e-05	5.44938e-05	0.0150982	5.8753e-05	5.27635e-05	7.70197e-05	0.00274056	0.0091766	6.68387e-05	0.0632008	0.0858772	0.0644599	0.0698154	0.030292	0.0840058	0.106628	0.0739007
Atrazine	216.106	127.2	POS	C8H14ClN5	0.0591948	0.00109846	0.000904648	4.99561e-05	0.0033059	0.140757	0.00169452	0.17385	0.245867	0.351741	0.382092	0.214463	0.533822	0.675166	0.275232	0.503993	4.93441e-05	0.00118955	0.000875815	0.00339581	0.00186624	0.00322675	5.2198e-05	0.000854524
PC(20:2(11Z,14Z)/20:5(5Z,8Z,11Z,14Z,17Z))	832.584	36.3	POS	C48H82NO8P	7.93805	3.90598	3.65573	5.06695	3.97663	7.48971	4.13987	6.80267	9.53484	7.99689	10.4385	6.96849	13.0913	11.8996	11.9465	8.69983	7.5202	7.29589	5.79991	6.59178	5.81162	4.89187	5.72255	2.82982
PC(22:6(4Z,7Z,10Z,13Z,16Z,19Z)/22:4(7Z,10Z,13Z,16Z))	882.6	36	POS	C52H84NO8P	0.298261	0.185819	0.143868	0.328861	0.145225	0.427515	0.168914	0.330989	0.575569	0.639223	0.42483	0.522635	0.9044	0.646986	0.357663	0.685266	0.310176	0.327409	0.209024	0.322937	0.260817	0.301827	0.346067	0.192079
4-Chloro-5,6,7,8-tetrahydroquinazolin-2-amine	184.061	34.9	POS	C8H10ClN3	1.23059	0.0893534	0.0501411	0.18625	0.0687953	0.765072	0.0559446	0.755539	1.14377	0.247575	1.28698	1.12782	0.955418	1.06623	0.857946	1.19085	0.111807	0.0806017	0.0691769	0.133935	0.160313	0.124894	0.148988	0.0916008
4,5-Dimethoxy-2,3-dihydro-1H-isoindole-1,3-dione	206.049	312.8	NEG	C10H9NO4	0.01843	0.00664015	0.00687027	0.0110728	0.011665	0.00941528	0.00753924	0.0141396	0.00467073	0.00439795	0.00432503	0.00394467	0.00327621	0.00434684	0.00371611	0.00383454	0.0179663	0.0213935	0.0255362	0.0232019	0.018395	0.0169164	0.0185176	0.0201383
Atrazine-desisopropyl-2-hydroxy	156.084	180	POS	C5H9N5O	0.0317956	0.0986446	0.0500833	0.0636046	0.0291397	0.0883293	0.0886764	0.118937	0.102049	0.0900789	0.162422	0.163329	0.120478	0.0861062	0.0651307	0.146012	0.0780795	0.0537071	0.0272554	0.0513176	0.0364856	0.0320746	0.0276134	0.010884
N-(1-Acetylpiperidin-4-yl)-N'-adamantan-1-ylurea	320.231	388.4	POS	C18H29N3O2	0.1016	0.0153081	5.15243e-05	0.0690004	0.00816753	0.0880314	0.00668536	0.130509	0.00669985	0.0132355	5.8753e-05	5.27635e-05	7.70197e-05	7.28558e-05	5.4507e-05	6.68387e-05	0.0544105	0.0857293	0.100053	0.0740505	0.0860091	0.0779967	0.0517788	0.040264
N-[1-(1H-Benzimidazol-2-yl)-3-methyl-1H-pyrazol-5-yl]acetamide	254.103	304.8	NEG	C13H13N5O	0.0135218	0.0343065	0.040975	0.0123468	0.0356955	0.0159009	0.0386735	0.016784	0.0293401	0.0318694	0.0455242	0.0582694	0.0363476	0.0357629	0.03498	0.0323322	0.0119284	0.020962	0.0146757	0.0116618	0.0174168	0.0128894	0.0179555	0.0136057
5-Methoxypsoralen	215.033	41.4	NEG	C12H8O4	2.9537	2.0089	1.79845	3.42286	2.81885	3.20667	1.98998	3.49247	0.612738	0.643069	0.702314	0.602798	0.445641	0.660292	0.598681	0.680092	2.42388	2.06869	2.49436	2.17512	2.20779	1.77106	2.29381	2.00516
6-Methyl-2-phenyl-4-quinolinol	234.098	154.6	NEG	C16H13NO	0.0274802	0.0083663	0.0100356	0.031515	0.00909313	0.0204931	0.00707246	0.0207679	0.00558516	0.00687902	0.00796802	0.00911074	0.00673401	0.0106171	0.0119235	0.00629165	0.0143681	0.0111841	0.0182354	0.0177039	0.0217992	0.0165806	0.0180784	0.0266325
PC(22:4(7Z,10Z,13Z,16Z)/20:4(5Z,8Z,11Z,14Z))	858.601	134.3	POS	C50H84NO8P	3.09423	2.26609	2.37373	3.16879	2.11057	3.99987	2.0423	4.20083	4.16017	5.32747	4.34133	4.23228	5.97487	5.30802	4.15767	5.31029	3.14657	3.20678	2.46662	2.83792	2.39497	3.27839	3.4371	1.94396
Cunaniol	215.103	127.1	POS		0.826324	0.00689159	0.00547652	0.0627478	0.010744	1.77961	0.00534052	2.03221	2.51134	3.82601	3.79476	2.36316	5.72573	7.01258	2.77951	5.14518	0.0419398	0.0383805	0.0294689	0.0327768	0.00774792	0.0174741	0.0407394	0.0111559
PG 18:1_20:4;2O	827.518	632.7	NEG		0.00968701	0.00798445	0.00725031	0.00805591	0.00985917	0.00917144	0.00810604	0.0078347	0.00640884	0.00706607	0.00560531	0.00627479	0.00802104	0.0067158	0.00784336	0.00937212	0.0114081	0.0102101	0.00919281	0.00979179	0.00991284	0.00905428	0.0103688	0.00968994
3,5-Dimethoxy-N-4-pyridinylbenzamide	259.104	287.5	POS	C14H14N2O3	0.0703199	0.0132124	0.0076405	0.0542168	0.0129459	0.0858211	0.0147568	0.092479	0.120354	0.14455	0.122614	0.155123	0.140569	0.138522	0.1191	0.130509	0.0202603	0.0245385	0.0139068	0.0159995	0.0129568	0.0161157	0.0299079	0.0127728
PC(22:4(7Z,10Z,13Z,16Z)/22:5(4Z,7Z,10Z,13Z,16Z))	884.614	131.1	POS	C52H86NO8P	0.639943	0.482702	0.468635	0.659807	0.38624	0.716488	0.428692	0.793292	0.721232	1.06752	0.824863	0.878024	1.02079	1.10906	0.739792	1.07182	0.553113	0.475066	0.328184	0.591	0.451353	0.659117	0.697129	0.50204
N-[1.3-dihydroxyoctadec-4-en-2-yl]tetracos-15-enamide	706.632	29.9	NEG		0.118962	0.0813502	0.0904632	0.105176	0.128285	0.105033	0.0836836	0.127929	0.0635169	0.0747467	0.0707263	0.0849618	0.0906877	0.0821564	0.0787915	0.0788091	0.108875	0.098516	0.100632	0.0963047	0.123438	0.103612	0.113159	0.0997074
3a,4,5,9b-Tetrahydro-3H-cyclopenta[c]quinoline-4,8-dicarboxylic acid	258.072	316.1	NEG	C14H13NO4	0.0615103	0.0568769	0.0564443	0.0621281	0.0602309	0.0590103	0.0589434	0.0616834	0.0597752	0.0594423	0.0560452	0.0562787	0.0540604	0.0583708	0.0578559	0.0573573	0.0610833	0.0613729	0.0607329	0.0607274	0.060424	0.0611742	0.0621353	0.0591268
N-Benzyl-N-cyclohexylamine	190.164	538	POS	C13H19N	0.1912	0.108743	0.122355	0.227823	0.0901348	0.331859	0.097884	0.267109	0.220654	0.337303	0.348249	0.340053	0.492891	0.504729	0.283465	0.429894	0.270326	0.263607	0.0925488	0.119122	0.137813	0.0782674	0.0933625	0.047187
2-Amino-1-(4-chlorophenyl)ethanone	170.033	360.2	POS	C8H8ClNO	0.725023	0.434615	0.474909	0.745488	0.408602	1.08196	0.515683	0.952419	0.782678	0.799485	0.830453	0.73893	1.22481	1.28552	0.824105	1.00013	0.772429	0.766277	0.469795	0.542566	0.461425	0.425322	0.506834	0.369177
N,N'-Bis(4-hydroxycyclohexyl)urea	257.187	208.9	POS	C13H24N2O3	0.0937558	0.0139855	0.0108601	0.102926	0.00403296	0.140249	0.0115182	0.122313	0.0941074	0.159679	0.116037	0.109805	0.154113	0.166475	0.128726	0.137797	0.0190622	0.0139778	0.00941831	0.0168797	0.00836186	0.0138236	0.00528074	0.00784785
2-Hydroxy-7-methylquinoline-3-carbaldehyde	186.052	54.1	NEG	C11H9NO2	0.102058	0.028591	0.0255071	0.0111856	0.0320263	0.105186	0.0277249	0.0987339	0.0109324	0.0147173	0.00959172	0.00710058	0.0118336	0.0302544	0.0366323	0.0293174	0.0947397	0.0791563	0.0980935	0.0836363	0.0875852	0.0696402	0.0916949	0.0745361
Ser-Val	205.119	302.1	POS	C8H16N2O4	0.0177201	0.000745178	0.0014161	0.0133616	5.39152e-05	0.02229	5.39362e-05	0.0219847	0.0133127	0.0355531	0.0262871	0.00983297	0.0194935	0.0259262	0.0482419	0.0278992	0.00940793	0.0095255	0.00715782	0.00677643	0.00309423	0.000600738	0.00350806	0.00401601
5-Fluoro-2,3-dihydrobenzo[d]isothiazole 1,1-dioxide	188.023	95.6	POS	C7H6FNO2S	1.71968	0.0024082	0.00129214	1.66111	0.0100358	2.43017	0.00899936	2.56646	0.000936286	0.00119802	0.00096752	0.00242911	0.00288801	0.00145844	0.00294124	0.00299013	1.02424	1.75507	1.20771	1.21414	1.59634	1.66414	1.57315	1.3599
(2-{[2-[hexadec-9-enoyloxy]-3-(tetradecanoyloxy)propyl phosphonato]oxy}ethyl)trimethylazanium	688.492	160.7	NEG		0.215839	0.144391	0.130074	0.144288	0.234991	0.196159	0.126323	0.206949	0.0916148	0.114361	0.108757	0.10573	0.118247	0.119526	0.103	0.13334	0.199312	0.168151	0.178614	0.150756	0.177814	0.172278	0.168807	0.157788
PE 18:1_18:1;3O	790.513	640	NEG		0.00214417	0.00431917	0.00359801	0.00159237	0.00294965	0.00191419	0.00306953	0.00214744	0.00288387	0.00315469	0.00363417	0.00397617	0.00406313	0.00365284	0.00334739	0.00524906	0.0013475	0.00185185	0.00276245	0.00187079	0.0031044	0.00198859	0.00189058	0.00185285
17-Trifluoromethylphenyltrinorprostaglandin F2.alpha.	455.21	353.9	NEG	C24H31F3O5	0.0131368	0.00243675	0.00079123	0.00790051	0.00120782	0.00840472	0.00149313	0.0103808	0.00123227	0.00285072	0.00111745	0.0018444	1.16419e-05	0.000411435	0.000900021	0.00100868	0.00853376	0.0134698	0.00856253	0.0115141	0.0113366	0.00876227	0.0104614	0.0104995
LPI 14:0	543.258	284.5	NEG		0.000306347	0.00146876	0.00233169	1.133e-05	0.00236136	0.000340349	0.000535671	0.000268439	0.00183128	0.00370104	0.00270029	0.0017656	0.00108879	0.000584466	0.00369184	0.00219399	0.000385137	0.000960761	0.00038342	0.000553949	0.000337705	0.000401422	0.000746181	0.000379626
Mukoline	228.099	355.6	POS	C14H13NO2	0.0509209	0.00988724	0.0079449	4.99561e-05	0.00312273	0.0515251	0.00625609	0.0430135	0.0398638	0.0426099	0.0471976	0.0565334	0.0700913	0.0573886	0.0393316	0.0419412	0.0162166	0.0169396	0.0119267	0.0130447	0.0117939	0.00884025	0.0180837	0.0100003
PC(22:5(7Z,10Z,13Z,16Z,19Z)/20:4(8Z,11Z,14Z,17Z))	856.581	132.5	POS	C50H82NO8P	3.85767	2.23649	1.36734	2.70422	2.18414	5.06793	1.9285	5.34068	5.8127	6.19877	5.9108	4.7064	9.07209	6.887	5.3962	6.98729	3.51024	3.79918	2.46414	3.1766	2.8491	2.36872	2.51279	2.11455
CerP 14:1;2O/24:1	672.525	520.1	POS		0.12838	0.13468	0.111788	0.1108	0.125921	0.138663	0.123375	0.147101	0.164973	0.157616	0.148511	0.121047	0.169191	0.156473	0.139977	0.128984	0.130649	0.1171	0.109995	0.114536	0.117526	0.12311	0.108676	0.117298
3-Bromo-5-nitro-4-pyridinol	216.928	53.2	NEG	C5H3BrN2O3	0.112626	0.0925822	0.0993823	0.11937	0.126657	0.0945101	0.123743	0.109709	0.116398	0.124113	0.147663	0.152842	0.136741	0.112998	0.13151	0.129691	0.117899	0.0925587	0.0977877	0.0928018	0.0945598	0.109018	0.106829	0.0973117
PC 16:0_20:5;O	840.534	630.8	NEG		0.0238184	0.0170772	0.0152035	0.0137852	0.0268044	0.0159218	0.0238119	0.0127139	0.0111611	0.0150176	0.0120067	0.0122659	0.0128355	0.00857468	0.0143123	0.0122293	0.0164305	0.0156179	0.0152623	0.0203951	0.0231858	0.0169139	0.013343	0.0176034
SPB 16:0;2O	274.274	385.3	POS		2.14805	3.23322	2.07498	2.0746	2.17201	2.83898	2.7506	2.40034	2.88432	3.55655	3.7924	2.94276	3.73513	4.25187	2.53855	5.4417	2.36624	2.76511	1.76404	1.78897	2.00912	1.73962	1.90622	1.5403
(4S,5Z,6S)-4-(2-methoxy-2-oxoethyl)-5-[2-[(E)-3-phenylprop-2-enoyl]oxyethylidene]-6-[(2S,3R,4S,5S,6R)-3,4,5-trihydroxy-6-(hydroxymethyl)oxan-2-yl]oxy-4H-pyran-3-carboxylic acid	215.034	400	NEG		0.0438453	0.0169482	0.0187285	0.0344657	0.0221229	0.0355329	0.0177442	0.0457448	0.0186104	0.0225368	0.0115961	0.0148015	0.0101539	0.0139579	0.0146726	0.0127006	0.0307322	0.0304388	0.0330722	0.0303881	0.0396777	0.0394661	0.0342478	0.0331733
LysoPC(22:6(4Z,7Z,10Z,13Z,16Z,19Z))	568.341	204	POS	C30H50NO7P	19.8551	6.74499	5.2046	20.1452	5.69092	20.4183	5.70736	21.5816	34.2846	16.6724	20.0271	18.338	36.3615	23.4542	23.6998	25.5002	6.38338	8.17388	3.36773	3.08768	4.68407	5.89924	8.67709	3.86383
BIBR-1048 (Dabigatran)	628.332	211.4	POS		0.0137914	0.00089361	0.000949074	0.0117885	0.00144544	0.0186573	5.39362e-05	0.0195883	0.00144058	0.00210611	0.000383656	5.27635e-05	7.70197e-05	7.28558e-05	0.000471386	0.00120604	0.00702518	0.00430851	0.00669634	0.00467723	0.0134441	0.0132801	0.00861891	0.00642765
Cefacetrile	340.057	327.4	POS	C13H13N3O6S	0.095904	0.0385024	0.0293018	0.110467	0.049869	0.0446476	0.0154318	0.114523	0.0227051	0.17654	0.146226	0.144374	0.202968	0.21348	0.161916	0.170242	0.0348681	0.0345135	0.0297608	0.0496596	0.0402985	0.041434	0.0492859	0.0325845
PC O-20:4_3:0	630.378	503.6	NEG		0.03109	0.00654454	0.00676747	0.0381038	0.00632884	0.0302721	0.00652774	0.0286234	0.00487923	0.00814727	0.0042463	0.00495596	0.00407278	0.00842202	0.0151846	0.00628359	0.0222416	0.0268265	0.0251717	0.0322171	0.0213112	0.0209287	0.0183963	0.0308038
SL 18:1;O/26:6	747.567	501.8	POS		0.0236466	0.0279593	0.0287288	0.0234676	0.0316294	0.0382807	0.029989	0.0306972	0.060189	0.0424202	0.0352974	0.0414851	0.0420327	0.0417889	0.038375	0.0219199	0.0175033	0.0293302	0.0214652	0.0221113	0.0289926	0.0279655	0.0241419	0.0236194
Bonactin	399.239	371.6	NEG	C21H36O7	0.00145057	0.000730219	0.000550997	0.00356004	0.000240556	0.00322428	0.00027625	0.0027332	0.000438948	0.000522569	0.000381039	0.000598086	0.000337366	0.000214757	0.000645189	0.000263366	0.000881917	0.00330994	0.00166857	0.000762422	0.00307075	0.00196272	0.0026302	0.00143488
PI 25:4	727.334	246	POS		0.0028012	0.00709488	0.0103474	0.00330743	0.0107626	0.00213214	0.00304833	0.0011771	0.0276594	0.0264279	0.0254349	0.0272912	0.0280381	0.0185505	0.0500702	0.0328731	0.00476528	0.0103975	0.00510067	0.00526352	0.00364716	0.00346651	0.00869097	0.00430422
Erionyl Yellow AR	583.094	490.8	POS	C26H22N4O8S2	5.64709e-05	0.00985313	0.00567676	0.000572051	0.00538608	7.48979e-05	0.00653773	0.000654459	0.000415665	5.92265e-05	0.000647175	5.27635e-05	7.70197e-05	7.28558e-05	5.4507e-05	6.68387e-05	0.00599728	0.00396833	0.00227496	0.00319472	0.00300133	0.0044544	0.00395404	0.00370529
9-Hydroxy-4-methoxypsoralen_9-glucoside	395.099	276.7	POS		0.127469	0.00782184	0.00436411	0.0044596	0.00373465	0.157719	0.00317621	0.169401	0.168391	0.168105	0.141791	0.168696	0.177233	0.151715	0.160618	0.13018	0.0133883	0.0198121	0.00715461	0.00329764	0.00648334	0.0128582	0.0337034	0.0141091
DGCC 9:0_10:0	546.401	487.1	POS		0.0694491	0.0685964	0.0631318	0.0346994	0.092529	0.0457781	0.0703507	0.0704806	0.138128	0.127428	0.136121	0.089714	0.118964	0.120104	0.0803792	0.119665	0.0615268	0.0618999	0.0645062	0.0583556	0.0617264	0.0747319	0.0670076	0.0564968
1-(4-Bromophenyl)-2-(4-morpholinyl)ethanol	286.043	416.8	POS	C12H16BrNO2	0.0275921	0.120471	0.0986903	0.10644	0.118207	0.00520499	0.151524	0.00200724	0.0249146	0.00376187	0.00822049	0.0129171	0.00406451	0.00635414	0.0154647	0.00720554	0.0513191	0.0395293	0.0447247	0.0447913	0.026405	0.102205	0.0386073	0.0727602
Dimethyl fumarate	145.05	318.1	POS	C6H8O4	0.225713	0.140872	0.102629	0.244827	0.108941	0.248152	0.115879	0.238694	0.195505	0.30382	0.247063	0.253609	0.334273	0.34689	0.261248	0.289702	0.118097	0.135524	0.0957134	0.134347	0.112726	0.114473	0.122277	0.0823862
MG 17:0	362.327	384.6	POS		5.64709e-05	0.239965	0.115173	4.99561e-05	0.113681	0.004476	0.176686	0.0454443	0.244518	0.314375	0.312665	0.231697	0.155816	0.233192	0.134486	0.266959	0.0348059	0.0207844	0.0181254	0.0345504	0.011873	0.0132871	0.0105515	0.029243
5-(o-Nitrobenzylidene)barbituric acid	262.051	494.7	POS	C11H7N3O5	4.60106	3.41634	3.18005	7.47302	2.90002	4.75373	4.45731	5.66484	5.28741	7.34789	5.60261	6.84678	6.85419	5.44424	5.81095	5.62378	5.62505	4.15964	2.60908	3.73048	1.07579	3.44009	3.20005	2.36984
MG 15:0	334.295	401.2	POS		0.00449012	0.0364305	0.0498244	0.0057722	0.0229955	0.00522104	0.0542691	7.30172e-05	0.385841	0.153301	0.272227	0.219322	0.0682016	0.894054	0.143619	0.68677	4.93441e-05	0.00646289	0.00222434	0.00680165	5.03447e-05	5.25157e-05	0.00637897	4.70934e-05
3-O-Feruloylquinic acid	367.105	310.1	NEG	C17H20O9	0.338534	0.230363	0.246888	0.350627	0.29165	0.331995	0.215628	0.469217	0.0348246	0.0295894	0.0285738	0.0175067	0.00437341	0.0220039	0.0155162	0.0157935	0.30796	0.293527	0.275521	0.290373	0.251797	0.202986	0.331997	0.217649
(2-aminoethoxy)[3-[hexadec-1-en-1-yloxy]-2-[hexadec-9-enoyloxy]propoxy]phosphinic acid	672.5	153.2	NEG		0.103978	0.0712314	0.0523184	0.0725887	0.102557	0.0869255	0.0682574	0.0973014	0.0351417	0.0483873	0.0469808	0.0543336	0.0562978	0.0434817	0.0339356	0.046892	0.0886676	0.08178	0.0816497	0.0684071	0.081607	0.0846911	0.0796942	0.0797701
1-(3-Chlorophenyl)-6,6-dimethyl-1,6-dihydro-1,3,5-triazine-2,4-diamine	252.102	277.3	POS	C11H14ClN5	0.0578039	0.0204091	0.0205383	0.0268618	0.013141	0.0697723	0.0131727	0.0581501	0.0688731	0.0840098	0.0896455	0.0662808	0.127772	0.10391	0.0800445	0.0986818	0.0254572	0.0440423	0.0293764	0.0220726	0.0233694	0.0219388	0.0302419	0.0282308
LPC O-16:3	520.306	521	NEG		0.00123851	0.00161221	0.00158179	0.00297929	0.00165939	0.00303753	0.00205768	0.0021473	0.00101019	0.00168386	0.00119946	0.00174142	0.00117847	0.00158512	0.00141641	0.00151988	0.00163916	0.0020837	0.00249998	0.00174667	0.00252827	0.00299839	0.00206511	0.00234885
(25S)-7-Dafachronic acid	415.325	219.9	POS	C27H42O3	0.845296	0.274514	0.356425	0.852895	0.284159	0.878196	0.300013	1.33236	0.984344	1.39436	1.2219	1.54128	1.86976	1.58429	1.25935	1.88271	0.416282	0.757602	0.230665	0.542875	0.414903	0.305938	0.182514	0.08987
N-(3-Pyridyl)indomethacinamide	434.128	312.7	POS	C24H20ClN3O3	0.00994971	0.00260225	0.0026599	0.0142041	0.00359699	0.0118324	0.00293504	0.0148402	0.0130311	0.0133822	0.0136533	0.014259	0.0154604	0.0131398	0.0124639	0.0130001	0.00578436	0.00584281	0.00356176	0.00287632	0.0012298	0.000706332	0.00336784	0.000786637
N-((7E,11Z)-6,13,14-Trihydroxy-3-(1H-indol-3-ylmethyl)-4,5,10,12-tetramethyl-1,17-dioxo-2,3,3a,6,6a,9,10,13,14,15,16,17-dodecahydro-1H-cyclotrideca[d]isoindol-15-yl)acetamide	590.323	203.7	POS	C34H43N3O6	0.943391	0.367677	0.292285	0.829771	0.300682	0.947542	0.326736	0.940008	1.52706	0.799643	0.927308	0.827077	1.65726	1.11072	1.14717	1.15021	0.363914	0.455409	0.200546	0.184525	0.269643	0.324746	0.463	0.217705
2,3-Dihydroxybenzonitrile	136.04	75.4	POS	C7H5NO2	5.64709e-05	5.29242e-05	5.15243e-05	4.99561e-05	5.39152e-05	7.48979e-05	5.39362e-05	7.30172e-05	0.0660473	0.086475	0.163142	0.0970222	0.160393	0.0666295	0.0610208	0.121783	0.00949384	0.00911504	4.99853e-05	5.16627e-05	5.03447e-05	0.00345137	0.00641391	4.70934e-05
2-Furanacetic acid, tetrahydro-5-(2-hydroxypropyl)-.alpha.-methyl-, 2-[5-(1-carboxyethyl)tetrahydro-2-furanyl]-1-methylethyl ester	385.224	328.4	NEG	C20H34O7	0.0219582	0.00409335	0.0039083	0.0544353	0.00351345	0.0344946	0.00415532	0.0284454	0.00519764	0.00567838	0.00242112	0.00307931	0.00193565	0.00180599	0.0032305	0.00152199	0.0293829	0.031596	0.0307824	0.0255061	0.0401934	0.038467	0.0343027	0.0308985
5-Pyrimidinecarboxamide, 2-[(2,4-dichlorophenyl)amino]-N-[(tetrahydro-2H-pyran-4-yl)methyl]-4-(trifluoromethyl)-	449.076	43.6	POS	C18H17Cl2F3N4O2	0.0428246	0.0481644	0.0349763	0.0248744	0.0296045	0.0342883	0.0330782	0.0438725	0.0772105	0.0684372	0.0592042	0.0559029	0.0391332	0.0580132	0.088134	0.0693497	0.0325978	0.0497763	0.0332165	0.0451881	0.0308055	0.0322385	0.0333887	0.034499
Benserazide	256.092	402.3	NEG	C10H15N3O5	0.00142357	0.000850838	0.0011782	0.00298672	0.000729552	0.0020013	0.00140297	0.0014197	0.00102013	0.0013541	0.000829138	0.000650805	0.000294454	0.000433556	0.000469411	0.000828572	0.00202689	0.00220829	0.00244918	0.00198977	0.00328243	0.00327769	0.00250973	0.00327447
Delphinidin-3-O-sambubioside	597.152	307.2	POS		0.0117908	0.0100793	0.01321	0.00723445	0.0178675	0.0192179	0.00918494	0.0109711	0.0354728	0.046092	0.0970504	0.0767096	0.0480297	0.0171431	0.0193538	0.0147563	0.00997348	0.011345	0.0101325	0.0108637	0.0144703	0.00600987	0.00887306	0.0121753
Ile-His	269.16	210	POS	C12H20N4O3	0.425098	0.176146	0.172232	0.457607	0.138211	0.332483	0.112889	0.433659	0.0746283	0.0733672	0.0500807	0.064237	0.0535171	0.0840608	0.076853	0.0678831	0.267539	1.03646	0.388809	0.470884	0.294676	0.357924	0.549281	0.469222
N2-(tert-Butyl)-6-chloro-N4-(4-methylphenyl)-1,3,5-triazine-2,4-diamine	292.133	76.4	POS	C14H18ClN5	0.0113692	0.0434362	0.0566006	0.00972295	0.03183	0.0143973	0.0624315	0.0149445	0.0237695	0.0257538	0.105993	0.0862155	0.077352	0.0600981	0.0335044	0.059681	0.0117129	0.0139842	0.01049	0.00967199	0.0108889	0.0113407	0.00882249	0.00947911
LysoPE(18:1(11Z)/0:0)	480.309	218.5	POS	C23H46NO7P	5.37393	1.92582	1.43548	4.59236	1.39782	5.0624	1.00785	5.01151	6.75536	4.35646	4.34612	3.35499	8.14205	5.66245	7.0773	5.93525	1.41162	1.79777	0.859392	0.864398	0.902244	1.42287	1.95551	1.00486
4-Imidazolidineheptanoic acid, 3-[(2-cyclohexyl-2-hydroxyethyl)amino]-2,5-dioxo-1-(phenylmethyl)-	460.28	211.6	POS	C25H37N3O5	0.204903	0.1563	0.129885	0.0723279	0.139825	0.303034	0.111847	0.278118	0.295187	0.344345	0.259487	0.206602	0.36677	0.33192	0.333497	0.263803	0.13144	0.165689	0.131223	0.132511	0.0969495	0.0662974	0.213259	0.116901
2,2'-(2-Hydroxyethylazanediyl)diacetic acid	178.071	189.3	POS	C6H11NO5	0.197991	0.121427	0.128978	0.190415	0.115596	0.225108	0.137897	0.287578	0.190038	0.232456	0.226795	0.231971	0.566071	0.248333	0.209854	0.460008	0.11465	0.145737	0.0800493	0.118594	0.0975574	0.1046	0.0869461	0.0838754
1,3-Diazaspiro[4.6]undecane-2,4-dione	183.113	80.7	POS	C9H14N2O2	0.045627	0.0306789	0.0330031	0.0371561	0.0246024	0.0488478	0.0351357	0.0629816	0.0588041	0.0766201	0.0706035	0.1622	0.139701	0.249143	0.0747112	0.204232	0.0521578	0.037419	0.0316251	0.0527826	0.0686265	0.0286775	0.0274566	0.0202675
7-Hydroxymethotrexate	469.154	387.9	NEG	C20H22N8O6	0.0246138	0.0106762	0.00522427	0.0156634	0.00672638	0.0174046	0.00590491	0.0306066	0.0048034	0.0059873	0.00733829	0.00430556	0.00178543	0.00301883	0.00440956	0.00346099	0.0234905	0.0342356	0.0289083	0.0264144	0.0386315	0.0337339	0.0322065	0.0363624
cis-stilbene_oxide	197.101	528.7	POS		0.0896391	0.033701	0.0208974	0.0265111	0.0253471	0.0886157	0.015562	0.069841	0.0708141	0.0783447	0.106462	0.0852662	0.171932	0.118248	0.0786102	0.0998616	0.0209998	0.0407498	0.0209295	0.0262697	0.00363053	0.020291	0.0468219	0.00753737
4-[(2R,3S,7R,8R,8aS)-2,3,4'-Trihydroxy-4,4,7,8a-tetramethyl-6'-oxospiro[2,3,4a,5,6,7-hexahydro-1H-naphthalene-8,2'-3,8-dihydrofuro[2,3-e]isoindole]-7'-yl]butanoic acid	488.26	477.1	POS	C27H37NO7	0.0212199	0.00119762	0.000673814	0.00504917	0.000691624	0.0275117	0.000346093	0.0308425	0.0249733	0.0289606	0.02228	0.0267493	0.0539264	0.0679056	0.0355349	0.0394033	0.000636765	0.00117738	0.000718235	0.000588623	5.03447e-05	0.000742257	0.00544915	0.00111807
S-Formylglutathione	336.088	397.9	POS	C11H17N3O7S	0.231656	0.38417	0.411239	0.347821	0.435499	0.0303773	0.396097	0.0182471	0.182458	0.0256052	0.06142	0.113613	0.0336369	0.0519406	0.144974	0.0800978	0.354277	0.283537	0.270795	0.26876	0.129006	0.435396	0.271304	0.348376
Prosapogenin A	723.43	215.7	POS	C39H62O12	0.820424	0.38957	0.331319	0.560074	0.266975	1.07767	0.257062	1.11787	1.17929	1.45366	1.36022	1.39589	1.86507	1.83958	1.36823	1.78905	1.03458	0.890088	0.514531	0.736997	0.495947	0.538264	0.853922	0.407627
1,5-Bis-(4-fluorophenyl)penta-1,4-dien-3-one	271.092	194.4	POS	C17H12F2O	0.21898	0.0375906	0.042136	0.140821	0.0452363	0.257533	0.0562869	0.279119	0.261597	0.263538	0.359439	0.278816	0.528475	0.34202	0.248996	0.309658	0.0808436	0.134699	0.0606971	0.115164	0.0719611	0.0502207	0.0260997	0.0227205
3-Hydroxystigmast-5-en-7-one	429.378	190.3	POS	C29H48O2	2.69592	1.61629	1.47844	3.42154	1.70496	4.51809	1.49566	5.0652	2.19768	6.03319	3.10643	4.99044	5.00131	6.31018	4.0653	4.97028	1.9534	2.634	1.39179	2.30022	2.40503	1.17999	1.52355	0.956728
N-3-Oxohexadec-11Z-enoyl-L-homoserine lactone	352.249	98.9	POS	C20H33NO4	0.0184311	0.0243785	0.0487434	0.0440483	0.0256098	0.0308212	0.00528907	0.0689557	0.0732264	0.0958105	0.0630724	0.0511791	0.0882579	0.0732385	0.0631141	0.0806533	0.0153182	0.00987555	0.00729228	0.0109253	0.00579174	0.0168259	0.0221237	0.00501872
2,3-Dihydroxy-1-(7-methoxy-2-oxo-2H-chromen-6-yl)-3-methylbutyl .beta.-D-glucopyranoside	457.169	43.7	POS	C21H28O11	0.0123279	0.047381	0.0294829	0.00867484	0.0264356	0.0145295	0.0426447	0.0201261	0.149031	0.139035	0.134915	0.15136	0.13095	0.0717584	0.0563217	0.042436	0.0101075	0.0268785	0.0195615	0.014394	0.0154369	0.0221185	0.0173493	0.012995
L-694,247	410.127	40.8	NEG		0.0788902	0.0646139	0.0537169	0.0592494	0.0626152	0.0823077	0.0500664	0.0850457	0.0381631	0.0357713	0.0233681	0.0264197	0.0185731	0.0437853	0.0307036	0.0373567	0.0635965	0.0646767	0.0576144	0.0621313	0.0587609	0.0644654	0.0609327	0.069224
2-Amino-5-nitrobenzoic acid	181.029	307.3	NEG	C7H6N2O4	0.0190298	0.0106342	0.0100772	0.00817847	0.0121187	0.0181013	0.00851509	0.0194418	0.00888484	0.00905082	0.00581033	0.00587323	0.00460315	0.00672804	0.00747434	0.00538454	0.0114068	0.0162004	0.0138369	0.0160615	0.0218797	0.0214148	0.0154872	0.0116853
Eslicarbazepine acetate	297.122	294	POS	C17H16N2O3	0.0148871	0.0772043	0.0562109	0.0832913	0.0788326	0.00185226	0.113694	0.00246709	0.0164683	0.00541287	0.0049466	0.00694663	0.00133176	0.00509487	0.00971154	0.0058066	0.0397686	0.0275724	0.0275601	0.029103	0.0169026	0.0722543	0.0275283	0.052554
cis-Clopenthixol	401.146	287.6	POS	C22H25ClN2OS	0.00688106	0.00113956	0.000815487	0.000536099	0.000516681	0.00862872	5.39362e-05	0.00688845	0.00531484	0.00631026	0.00746354	0.00467295	0.011672	0.00843161	0.00633499	0.0100085	0.00155521	0.00325671	0.00150725	0.000363701	0.00076785	0.00096266	0.00285088	0.00116193
2-(4-Hydroxyphenyl)ethyl 6-O-((2-oxo-2,3-dihydro-1H-indol-3-yl)acetyl)-.beta.-D-glucopyranoside	472.16	209.4	NEG	C24H27NO9	0.000277378	0.00144071	0.00213235	0.000307398	0.00181237	0.000239929	0.000792207	6.29852e-05	0.00166019	0.00219744	0.00227598	0.00241931	0.00204823	0.000905995	0.00145514	0.00178347	0.000425094	0.00033821	0.00027076	0.000206316	0.000348446	0.000246148	0.000304219	0.000337787
Teratop Blue BLF	377.075	430.2	POS	C20H12N2O6	0.00635722	0.0230525	0.054413	0.0169796	0.0306922	0.00406359	0.0612317	0.00369138	0.0030435	0.00247274	0.00307876	0.00382025	0.00411306	0.00478435	0.00173473	0.00551595	0.00963729	0.0185849	0.0219711	0.0235978	0.00744745	0.0356904	0.0196177	0.0202044
Beta-Ecdysterone	481.312	219	POS		1.06218	0.402307	0.274938	1.12157	0.069811	1.25983	0.280656	1.27952	1.70848	1.02976	1.11475	0.838699	2.09604	1.42834	1.70798	1.01913	0.332993	0.447421	0.194875	0.132177	0.137337	0.239715	0.428146	0.152399
(S,R)-Nosapine	414.156	534.3	POS		0.0354813	0.0473045	0.0354507	0.0270178	0.0311969	0.0494506	0.0479771	0.0618317	0.00535306	0.0110181	0.00461985	0.00870455	0.00816876	0.0103012	0.00728656	0.0127608	0.0277201	0.0294771	0.0332124	0.0352615	0.0319307	0.0343608	0.025043	0.0286833
3-(3,4-Dimethoxyphenyl)-6-hydroxy-4-methylcoumarin	313.108	386.9	POS	C18H16O5	0.0466273	0.0948675	0.0618528	0.0734202	0.0571658	0.0939042	0.0539742	0.127712	0.010198	0.0150376	0.00270633	0.019585	0.0025532	0.00191974	0.00803114	0.00597205	0.0765749	0.0827073	0.0522558	0.0674807	0.0615406	0.0984858	0.0653038	0.0631254
Puerol B	313.108	355.6	POS	C18H16O5	0.0689874	0.0651656	0.0420871	0.0454421	0.0337467	0.0636809	0.0661485	0.081323	0.00739836	0.0070564	0.00299609	0.0177904	0.00382688	0.00532426	0.00513811	0.00887372	0.0381927	0.0423283	0.0417651	0.0382135	0.03015	0.057062	0.0522125	0.0350987
(3R,5S,5aS,6R,7S,8R)-5-(.beta.-D-Glucopyranosyloxy)-8,8a-dihydroxyhexahydro-1H-3,6-methanocyclopenta[e][1,3]dioxepin-7-yl benzoate	485.163	250.6	POS	C22H28O12	0.0140714	5.29242e-05	0.000388684	0.0063088	5.39152e-05	0.0254102	5.39362e-05	0.0211493	0.0168238	0.0408696	0.0269029	0.0378297	0.0257636	0.0472164	0.0331113	0.0503673	4.93441e-05	0.00422754	0.000963779	0.00103637	0.000488719	5.25157e-05	0.00254895	0.000209503
Flubendazole	314.091	89.8	POS	C16H12FN3O3	0.147219	0.210726	0.263696	0.336632	0.101265	0.021705	0.217227	0.0692602	0.44693	0.55776	0.492385	0.473787	0.346097	0.761605	0.413509	0.478887	0.0470693	0.0204422	0.0252796	0.0400696	0.0109362	0.011826	0.0260424	0.0353002
NAGly 22:6/22:5	731.544	627.8	POS		0.802452	0.629165	0.726736	0.555647	0.414574	0.75712	0.576015	0.896224	1.01653	1.26353	0.931451	1.09439	1.23438	1.24155	1.12275	0.572211	0.60796	0.68217	0.759389	0.80413	0.665536	0.606124	0.631149	0.643293
19-Norandrosterone glucuronide	451.231	353.9	NEG	C24H36O8	0.129625	0.0315469	0.0205072	0.065866	0.0179667	0.0566578	0.0229979	0.0931601	0.0223155	0.0391161	0.0170931	0.0191476	0.00581638	0.0090912	0.0293414	0.0173536	0.0794315	0.0974071	0.060671	0.086008	0.0599476	0.0596683	0.0816001	0.0624659
Digitalinum verum	713.37	306.5	POS		0.0103005	0.0145921	0.0274947	0.010173	0.00639619	0.00695215	0.0137233	0.00733981	0.0436959	0.054188	0.234195	0.164563	0.0629234	0.0234642	0.0364635	0.0938298	0.00338337	0.0108802	0.0082504	0.0138508	0.00860391	0.00947942	0.0155524	0.00731375
5-[(3-Pyridinylmethyl)sulfanyl]-4H-1,2,4-triazol-3-amine	208.064	312.8	POS	C8H9N5S	0.152142	0.00169259	0.00175028	0.0101005	0.00159949	0.0942993	0.00079224	0.103267	0.184445	0.215722	0.26141	0.213976	0.239577	0.262354	0.187968	0.273947	0.00371071	0.00397425	0.00114755	0.00205399	0.000926068	5.25157e-05	0.00225816	4.70934e-05
PE O-19:1_15:1	702.537	503.8	POS		0.1083	0.120382	0.109221	0.101721	0.130064	0.149725	0.145424	0.14043	0.242483	0.171623	0.168433	0.129118	0.166575	0.15405	0.148953	0.109574	0.0981446	0.0934503	0.0936248	0.0850793	0.101711	0.091386	0.114261	0.0990061
4-(4-Chloro-3-nitrobenzenesulfonyl)morpholine	307.013	35.4	POS	C10H11ClN2O5S	0.198142	0.187377	0.20642	0.110978	0.14658	0.245962	0.19975	0.223933	0.202832	0.262938	0.244678	0.213604	0.262675	0.296028	0.209832	0.247408	0.190614	0.163311	0.178234	0.18234	0.15824	0.19485	0.189264	0.136185
5-Amino-3-pyrrolidin-1-yl-1H-pyrazole-4-carbonitrile	176.093	283.6	NEG	C8H11N5	0.020262	0.0100287	0.00766402	0.018117	0.00970197	0.0248425	0.00899449	0.0181573	0.0120609	0.0095074	0.00973502	0.0107977	0.00982783	0.00600276	0.00611498	0.00613448	0.0174981	0.0242852	0.0206702	0.0228489	0.0219798	0.0164392	0.0223661	0.018696
Thymidine 3',5'-cyclic monophosphate	303.035	75.4	NEG	C10H13N2O7P	0.00552974	0.0456845	0.0429891	0.00635302	0.0371561	0.00140462	0.0698742	0.00413125	0.0654869	0.103408	0.0723476	0.11426	0.0639465	0.0636116	0.0541489	0.0558955	0.000657599	0.0243847	0.000813603	0.00954066	0.00455372	0.0137439	0.0103857	0.00983222
Gemcitabine diphosphate	421.994	43.3	NEG	C9H13F2N3O10P2	0.021608	0.00953334	0.00800395	0.0123666	0.00749916	0.0194672	0.00738405	0.0193508	0.0106528	0.00727399	0.00620254	0.00683044	0.0102738	0.00494117	0.00531638	0.00431701	0.0177918	0.0239978	0.0282438	0.0262322	0.0197221	0.0188582	0.0184353	0.0196195
rutamarin	374.199	105.7	POS	C21H24O5	0.034479	0.0107031	0.00676759	0.048854	0.0072951	0.0640904	0.00833136	0.0486427	0.0110924	0.0134143	0.00573182	0.00453203	0.0133505	0.00862178	0.00562563	0.00438054	0.0665576	0.0276747	0.0237489	0.0370875	0.0477887	0.0376374	0.0815479	0.0237162
Neomangiferin	585.149	250.4	POS	C25H28O16	0.0246734	0.000867912	0.000265898	0.0119306	0.000589109	0.0388183	0.000385211	0.0314219	0.035469	0.0487341	0.0599111	0.0500055	0.0769076	0.0632612	0.0370797	0.064508	0.00184452	0.00291754	0.00113864	0.0020363	0.000886735	0.000782963	0.00283123	0.000709121
Oct-1-en-3-yl 6-O-pentopyranosylhexopyranoside	423.226	209.9	POS	C19H34O10	0.125867	0.0618356	0.063197	0.151025	0.0462537	0.0968165	0.0362918	0.134274	0.027976	0.0296632	0.0196439	0.0194811	0.0198151	0.0354663	0.0350135	0.0281785	0.0851334	0.342404	0.116357	0.152119	0.0894506	0.104562	0.167772	0.150387
2-Hydroxybenzaldehyde [(E)-(2-hydroxyphenyl)methylidene]hydrazone	241.095	380.2	POS	C14H12N2O2	0.102196	1.27063	1.22819	1.3166	1.29083	7.48979e-05	1.83789	7.30172e-05	0.0976963	5.92265e-05	5.8753e-05	0.0974371	7.70197e-05	7.28558e-05	5.4507e-05	6.68387e-05	0.663866	0.449255	0.459305	0.499831	0.286183	1.21756	0.38687	0.675699
Ospemifene	379.149	226.1	POS	C24H23ClO2	0.0059261	0.114453	0.120717	0.17955	0.13186	0.00520803	0.160176	0.000887383	0.00543902	0.0129009	5.8753e-05	0.00203357	0.00554524	0.00705857	0.00751586	0.00433642	0.0438453	0.0638466	0.0578177	0.0571951	0.0214891	0.140339	0.0943024	0.0824993
3-(2-Phenyl-1H-indol-1-yl)propanoic acid	266.115	369.8	POS	C17H15NO2	0.166542	0.0191332	0.0134888	0.138194	0.0109852	0.219387	0.00978035	0.270233	0.195687	0.229916	0.250315	0.212706	0.271267	0.260158	0.194358	0.243428	0.0305551	0.0367091	0.0159294	0.0250179	0.0144171	0.0234468	0.0500471	0.0176736
5-Norbornene-2,3-dicarboximide, N-(2-ethylhexyl)-	276.193	457	POS	C17H25NO2	0.026703	0.0023073	0.000346614	0.0102087	0.00341119	0.0448248	0.00885945	0.0306019	0.0314922	0.125616	0.0692865	0.030274	0.108754	0.13618	0.0678961	0.0911627	0.00530852	0.0065746	0.0019171	0.00670477	0.00617351	0.00903521	0.00753347	0.00161703
1,5-dimethyl-1-vinyl-4-hexenyl acetate	219.142	294.1	POS		0.690289	0.489646	0.532856	1.38276	0.395231	0.586274	0.368708	1.27283	1.5042	1.52421	2.03834	1.75122	1.40542	1.65455	1.42197	1.96901	0.357888	0.367401	0.294892	0.376783	0.257051	0.306077	0.396543	0.318312
5-hydroxy-2-(4-hydroxyphenyl)-7-methoxy-4H-chromen-4-one	285.084	98.1	POS		0.226894	0.0679896	0.0548966	0.120761	0.0679479	0.116524	0.0855561	0.127111	0.021947	0.0266365	0.060606	0.0554612	0.0831713	0.030947	0.0535659	0.0601593	0.183215	0.0837749	0.187715	0.197501	0.098313	0.107991	0.149636	0.130199
3,3`-Dichlorobenzidine	253.026	95	POS		0.197204	5.29242e-05	5.15243e-05	0.166245	5.39152e-05	0.24867	5.39362e-05	0.308041	5.44938e-05	5.92265e-05	5.8753e-05	5.27635e-05	7.70197e-05	7.28558e-05	5.4507e-05	6.68387e-05	0.0692959	0.186384	0.075936	0.0721509	0.16645	0.16589	0.159249	0.109098
dTDP-4-acetamido-4,6-dideoxy-D-galactose	590.122	454.5	POS	C18H29N3O15P2	0.0241138	0.0441895	0.0788204	0.0628074	0.0614729	0.00470214	0.0895015	0.0136614	0.00680205	0.00698682	0.00507637	0.00819309	0.00614452	0.0157427	0.00970033	0.0139066	0.0334175	0.0402437	0.0649659	0.0708961	0.0169653	0.0762551	0.0410271	0.0501943
Oleoyl 3-carbacyclic phosphatidic acid	417.273	414.7	POS	C22H41O5P	0.0110154	0.000706486	0.000253617	0.0137789	0.000962836	0.00897428	0.0011408	0.00955107	0.0161432	0.0173315	0.0184334	0.0106781	0.0309962	0.0420804	0.0256404	0.021663	0.000765319	0.0011111	0.000831567	0.000566937	0.000317019	0.00032388	0.00194383	0.000353989
(1S,3R,3aS,4S,8aR)-1-(Acetyloxy)-3-hydroxy-6,8a-dimethyl-3-(propan-2-yl)-1,2,3,3a,4,5,8,8a-octahydroazulen-4-yl 4-methoxybenzoate	431.238	468.2	POS	C25H34O6	0.0307893	0.00321012	0.00342701	0.00958414	0.00253129	0.0573059	0.00192148	0.0538688	0.0309563	0.0285635	0.0264922	0.0298919	0.083845	0.117232	0.0472858	0.0669413	0.0046093	0.00958552	0.00654597	0.00460317	0.0011252	0.00247502	0.0254443	0.00476311
HexCer 9:1;2O/20:5	620.409	526.5	POS		0.00296122	0.0673824	0.0578037	0.0677764	0.0634528	0.0091834	0.122371	7.30172e-05	0.0580816	0.0282107	0.372319	0.375098	0.203564	0.178946	0.103232	0.219537	4.93441e-05	0.0228214	0.0173759	0.0185877	0.00203579	0.00180948	0.00211978	0.0104742
(2E)-N-[2-(3,4-Dimethoxyphenyl)ethyl]-N-methyl-3-phenyl-2-propenamide	326.171	217	POS	C20H23NO3	0.0165596	0.0207095	0.027107	0.00625077	0.0269351	0.0178369	0.0136759	0.00815018	0.0438789	0.0515803	0.0330753	0.0338586	0.0336024	0.0341714	0.068015	0.0316735	0.00917829	0.0163378	0.00768416	0.00723226	0.00827519	0.0132648	0.0165315	0.00703582
SMGDG O-17:0_3:0	627.349	476.9	NEG		0.112168	0.052769	0.0451458	0.136088	0.0447297	0.114896	0.0464588	0.099157	0.0543736	0.0582718	0.0320443	0.0280063	0.0414179	0.0428135	0.0603121	0.0367345	0.191879	0.0959156	0.106098	0.103377	0.136496	0.102264	0.155797	0.125535
Ginsenoyne_J	247.202	282.3	POS		0.146492	0.0758325	0.0653524	0.0970799	0.0531099	0.225215	0.064989	0.179258	0.262404	0.232416	0.213219	0.160978	0.315781	0.247123	0.227641	0.215971	0.134063	0.130024	0.0520638	0.0619872	0.0535433	0.054797	0.0715292	0.072662
2-(2-Chloro-4-fluorophenoxy)acetohydrazide	219.027	40.3	POS	C8H8ClFN2O2	3.48952	1.73358	1.62603	3.6875	1.19785	5.8295	1.81788	5.42935	0.495546	0.893466	0.724703	0.682084	0.475779	0.954417	0.680926	0.807628	2.35797	2.30216	2.9064	2.54182	2.58347	2.13616	2.59672	2.00324
Abscisic alcohol	251.167	561.8	POS	C15H22O3	0.0440677	0.0065182	0.00472968	0.00987179	0.00199992	0.0274866	0.00482928	0.0253652	0.0402086	0.0341282	0.0737608	0.0259566	0.0788815	0.0935627	0.101553	0.0435665	0.00999255	0.00576485	0.00175781	0.00653306	0.00233906	0.00198463	0.00228297	0.00453434
oleuropein	539.184	353.2	NEG	C25H32O13	0.00833366	0.00115849	0.00164771	0.00346088	0.000682387	0.00556371	0.00070069	0.00924168	0.00165953	0.00190151	0.00045122	0.000632153	0.000103851	0.000719209	0.0009986	0.000429433	0.00629592	0.00679369	0.00571841	0.00788812	0.00566146	0.00617667	0.00622212	0.00655383
8-Bromo-3,4-dihydro-2H-1,5-benzodioxepine-7-carboxylic acid	272.97	73.5	POS	C10H9BrO4	0.0210093	0.148267	0.140148	0.058639	0.137354	0.0243201	0.171729	0.0351841	0.257001	0.21468	0.215359	0.259252	0.161983	0.204437	0.0999205	0.144831	0.0181721	0.0418692	0.016887	0.0175768	0.00963513	0.0171472	0.011362	0.0132038
resveratrol	246.109	420	POS	C14H12O3	0.0657822	0.0138707	0.014743	0.0169894	0.0126671	0.0669783	0.0137315	0.0580372	0.0878259	0.0646179	0.0556755	0.0716547	0.0860816	0.0856398	0.0742371	0.04481	0.021917	0.0238386	0.0114451	0.0141885	0.0148643	0.0137261	0.0206008	0.0128747
3-Trifluoromethyl-4-nitrophenol	206.011	39.5	NEG		0.132334	0.164893	0.178328	0.137229	0.169074	0.132385	0.167716	0.126817	0.161843	0.184425	0.189994	0.183531	0.170834	0.191356	0.211235	0.192394	0.149264	0.125838	0.125413	0.136674	0.141106	0.152614	0.137291	0.139413
6-Paradol	261.181	283.1	POS		0.0314212	0.0139603	0.00974062	0.0195597	0.0100328	0.0614673	0.0177283	0.0373929	0.104006	0.0999656	0.0761662	0.0710112	0.115272	0.0482202	0.0970928	0.0613371	0.0370049	0.0197575	0.0167297	0.0165552	0.0189798	0.00750182	0.00351818	0.00805451
5-[(Chloroacetyl)amino]-4-cyano-N,N,3-trimethylthiophene-2-carboxamide	286.037	272.3	POS	C11H12ClN3O2S	0.0979218	0.0470966	0.0390922	0.0591793	0.034285	0.11951	0.0296329	0.122673	0.0958488	0.110291	0.113693	0.088107	0.168373	0.153437	0.102344	0.128186	0.0672695	0.0761282	0.0493653	0.0477992	0.0363573	0.0432283	0.0631122	0.0388862
2-((4-(2,3-Dihydrobenzo[b][1,4]dioxin-6-yl)thiazol-2-yl)amino)-2-oxoacetic acid	307.044	225.7	POS	C13H10N2O5S	0.250604	5.07818	4.91438	9.66683	5.32603	0.0257021	6.67018	0.0394454	0.0474405	0.762403	0.0527782	0.043113	0.0593321	0.56704	0.435734	0.0577857	2.66045	3.74737	2.63493	2.61513	1.1534	6.09115	4.58206	3.43066
Crotamiton	204.134	335.4	POS	C13H17NO	0.242574	0.144764	0.105059	0.239068	0.116894	0.218262	0.0983756	0.264313	0.235633	0.457714	0.357532	0.528103	0.685403	0.414571	0.23673	0.485953	0.217638	0.138476	0.124889	0.168156	0.354098	0.122285	0.115383	0.0783027
1-(Difluoromethyl)-3-methyl-1H-pyrazole	133.061	155.2	POS	C5H6F2N2	0.338988	0.0198378	0.0175248	0.392419	0.0162013	0.275754	0.0179738	0.451062	0.0189949	0.0214236	0.01813	0.0206355	0.0238142	0.0175543	0.0186964	0.0104509	0.0850978	0.370397	0.200767	0.125732	0.432084	0.587186	0.247222	0.291372
2-Imidazolidinethione	103.029	94.8	POS	C3H6N2S	0.278379	5.29242e-05	5.15243e-05	0.249726	0.0124015	0.287277	5.39362e-05	0.394169	5.44938e-05	5.92265e-05	5.8753e-05	5.27635e-05	7.70197e-05	7.28558e-05	5.4507e-05	6.68387e-05	0.074871	0.287343	0.0954508	0.0774905	0.226648	0.260778	0.218903	0.162152
O-Desmethylquinidine	311.18	438.2	POS	C19H22N2O2	0.170733	0.0513166	0.0363973	0.0731393	0.0358574	0.127949	0.0188781	0.154738	0.194266	0.428484	0.271135	0.170683	0.249636	0.27786	0.318289	0.278877	0.0512335	0.0632243	0.0341588	0.0430601	0.0287605	0.0189104	0.0507783	0.0226282
2,3a,7b,12-Tetrahydroxy-5-methyl-3a,4,5,6,7a,7b-hexahydro-2H-tetrapheno[6a,7-b]oxirene-7,8(3H,12bH)-dione	359.119	400.1	NEG	C19H20O7	0.00843411	0.00322649	0.00312697	0.00636136	0.00426352	0.00953299	0.00377585	0.0108957	0.00338024	0.00435807	0.00191688	0.00298894	0.00216755	0.00290521	0.00369235	0.00266022	0.00655712	0.00743392	0.00762333	0.00707522	0.00880857	0.00857891	0.00727223	0.00621454
2-{[(Isopropylamino)sulfonyl]amino}benzoic acid	259.069	249.8	POS	C10H14N2O4S	0.0537999	0.225112	0.188622	0.294967	0.226191	0.00817098	0.315871	0.00971602	0.0495275	0.0201434	0.0229951	0.0249221	0.0269451	0.0319202	0.0362446	0.0316287	0.113594	0.0864858	0.0793576	0.0898689	0.0476759	0.214739	0.0843429	0.134473
7-Amino-4-bromo-2,3-dihydro-1H-isoindol-1-one	224.963	197.9	NEG	C8H7BrN2O	0.0202494	0.0047934	0.00464729	0.014672	0.00802086	0.0214712	0.0062954	0.0209758	0.00798365	0.00688978	0.00342737	0.00304949	0.00183901	0.00366099	0.00435296	0.00344969	0.0166602	0.0190748	0.0137109	0.0128682	0.0265713	0.021795	0.0174168	0.0155543

## Sheet: Table S4
Table S4 The correlations between genes and metabolites with the criteria of p < 0.05 and r > 0.7 or r < − 0.7
	Hoxb9	Ankk1	Il24	Thiamine monophosp	1-Linoleoylglycero	Dodecanedioic acid	2-(1-Hydroxycycloh	Tridecanedioic aci	SL 10:0;O/10:0	Ghrl	Sst	Pgc	Atp4b	Atp4a	Clps	Gm3671	Gm10268	Rps12-ps19	Gm5599	Gm7695	Gm8292	Gm13864	Lor	Hopxos	Gm14046	Gm15441	Ctla4	Gm37660	Gm48868	Majin	Trim30d	Ubd	Cxcl9	Ifit2	Mx1	Gm45053	Ido1	Cxcl10	Cxcl11	Gm13904	Gm8662	Gm13665	Gm15289	Gm8724	Chga	Gm7613	Gm8318	Gm14048	DG 34:4
Hoxb9	1	0.8859	0.79352	0.71225	0.63162	-0.2683	-0.26576	-0.34316	-0.28802	-0.17728	-0.20789	-0.24044	-0.23608	-0.2435	-0.24161	0.17776	0.16267	0.15041	0.11599	0.11617	0.25673	0.2798	0.19471	0.20493	0.19237	0.25074	0.19213	0.22307	0.07184	0.11938	0.13228	0.16451	0.10463	0.13018	0.19841	0.18944	0.11793	0.02491	-0.01385	-0.07953	0.02112	0.02012	-0.09576	0.0817	-0.01821	0.0272	0.05086	-0.12834	-0.28259
Ankk1	0.8859	1	0.93659	0.66195	0.70288	-0.31324	-0.30598	-0.37243	-0.34924	-0.23501	-0.28133	-0.29229	-0.28795	-0.30205	-0.30119	0.19072	0.13676	0.13651	0.0805	0.10859	0.26032	0.25743	0.22119	0.21322	0.1872	0.21714	0.06694	0.14244	-0.04608	0.00874	0.03006	0.02098	-0.01443	0.02765	0.05239	0.07851	0.00799	-0.10112	-0.13844	-0.10577	0.0327	-0.04832	-0.14544	0.02701	-0.00451	0.02619	0.03723	-0.14627	-0.35746
Il24	0.79352	0.93659	1	0.53935	0.74419	-0.3096	-0.3072	-0.36113	-0.32003	-0.20571	-0.26042	-0.26202	-0.25509	-0.27492	-0.27412	0.18335	0.15208	0.12537	0.08685	0.11293	0.22569	0.22727	0.20488	0.23234	0.18702	0.17198	0.06563	0.13739	-0.05947	-0.00811	0.02393	0.01183	-0.02084	0.038	0.04807	0.03904	-0.00648	-0.10352	-0.14262	-0.06249	0.04968	-0.02209	-0.12997	0.02355	-0.0214	0.07234	0.02171	-0.14513	-0.35235
Thiamine monophosp	0.71225	0.66195	0.53935	1	0.53613	-0.45384	-0.41939	-0.49924	-0.50774	-0.42913	-0.44866	-0.45309	-0.46726	-0.46569	-0.46882	-0.12715	-0.15768	-0.14345	-0.1584	-0.17791	-0.08396	-0.07692	-0.08625	-0.15374	-0.10178	-0.09499	-0.13299	-0.13478	-0.19307	-0.15472	-0.12105	-0.12481	-0.14262	-0.16775	-0.11859	-0.10055	-0.12954	-0.25375	-0.2766	-0.34601	-0.26317	-0.30347	-0.34688	-0.2352	-0.3243	-0.28316	-0.23905	-0.16214	-0.57505
1-Linoleoylglycero	0.63162	0.70288	0.74419	0.53613	1	-0.45843	-0.50955	-0.51356	-0.43041	-0.34809	-0.37908	-0.36394	-0.36192	-0.38388	-0.38409	-0.07737	-0.11898	-0.14935	-0.11844	-0.14449	-0.05609	-0.04958	-0.13071	-0.01763	-0.11441	-0.06396	-0.135	-0.08782	-0.21492	-0.16895	-0.13041	-0.14314	-0.18779	-0.17504	-0.15086	-0.13392	-0.17933	-0.25652	-0.28029	-0.19646	-0.10694	-0.24129	-0.34487	-0.19271	-0.2642	-0.1539	-0.20403	-0.18798	-0.53439
Dodecanedioic acid	-0.2683	-0.31324	-0.3096	-0.45384	-0.45843	1	0.96113	0.94895	0.88591	0.84013	0.85265	0.92013	0.87677	0.8918	0.87126	0.77006	0.75268	0.73905	0.77147	0.71655	0.65817	0.66986	0.6319	0.69142	0.74829	0.73131	0.60537	0.58792	0.75952	0.7929	0.7334	0.77398	0.79237	0.78325	0.7246	0.71932	0.73342	0.70414	0.74117	0.83913	0.78678	0.72203	0.71177	0.76521	0.78944	0.8045	0.77612	0.72535	0.52852
2-(1-Hydroxycycloh	-0.26576	-0.30598	-0.3072	-0.41939	-0.50955	0.96113	1	0.94767	0.92145	0.87376	0.88605	0.91958	0.89854	0.91014	0.89763	0.77191	0.78362	0.78355	0.79999	0.75477	0.70098	0.71805	0.70725	0.72562	0.78391	0.757	0.66758	0.66629	0.79851	0.8225	0.75062	0.78037	0.80928	0.79446	0.7441	0.77191	0.779	0.75316	0.77162	0.8469	0.80122	0.78072	0.78958	0.80183	0.81002	0.82924	0.82125	0.61768	0.6368
Tridecanedioic aci	-0.34316	-0.37243	-0.36113	-0.49924	-0.51356	0.94895	0.94767	1	0.9067	0.88743	0.91279	0.92147	0.89857	0.92361	0.91022	0.72102	0.7434	0.75133	0.73352	0.72508	0.66341	0.6968	0.67863	0.70984	0.76213	0.73942	0.66885	0.66538	0.79484	0.7795	0.6939	0.7106	0.78018	0.80626	0.7225	0.74928	0.76473	0.79627	0.8246	0.8077	0.78324	0.80906	0.81291	0.79957	0.8345	0.81785	0.80903	0.66177	0.66397
SL 10:0;O/10:0	-0.28802	-0.34924	-0.32003	-0.50774	-0.43041	0.88591	0.92145	0.9067	1	0.94562	0.94026	0.94754	0.94852	0.95232	0.95341	0.7799	0.80964	0.79779	0.8234	0.80414	0.73619	0.73691	0.7231	0.76333	0.77514	0.77243	0.77819	0.74667	0.79323	0.82519	0.80094	0.80654	0.82814	0.81863	0.80092	0.79073	0.80492	0.82739	0.8311	0.87842	0.8178	0.85592	0.88001	0.87126	0.85794	0.84407	0.84043	0.41689	0.76306
Ghrl	-0.17728	-0.23501	-0.20571	-0.42913	-0.34809	0.84013	0.87376	0.88743	0.94562	1	0.98831	0.97406	0.98445	0.98771	0.99227	0.86022	0.89933	0.89752	0.90125	0.90149	0.84493	0.84928	0.83774	0.8706	0.87789	0.87318	0.88408	0.85896	0.86809	0.89754	0.87274	0.86942	0.89822	0.89976	0.88694	0.88255	0.89029	0.90982	0.90236	0.92402	0.88287	0.94548	0.96203	0.95833	0.93348	0.92361	0.92662	0.38753	0.76594
Sst	-0.20789	-0.28133	-0.26042	-0.44866	-0.37908	0.85265	0.88605	0.91279	0.94026	0.98831	1	0.96875	0.98266	0.99133	0.99276	0.81365	0.87083	0.87721	0.86607	0.86038	0.80991	0.83849	0.82511	0.85089	0.86544	0.84897	0.85388	0.86401	0.90633	0.90546	0.8271	0.84261	0.88603	0.89253	0.85739	0.89183	0.89493	0.91755	0.90926	0.90904	0.88225	0.94862	0.95512	0.92753	0.91026	0.90948	0.92677	0.45732	0.78781
Pgc	-0.24044	-0.29229	-0.26202	-0.45309	-0.36394	0.92013	0.91958	0.92147	0.94754	0.97406	0.96875	1	0.98925	0.99211	0.98699	0.86146	0.87933	0.8598	0.89481	0.85783	0.79536	0.79427	0.77174	0.81929	0.84691	0.83157	0.7893	0.77162	0.84712	0.89246	0.8543	0.87681	0.88763	0.87135	0.845	0.8354	0.85076	0.83765	0.8447	0.94981	0.89599	0.88115	0.88903	0.90935	0.89933	0.90571	0.89585	0.52557	0.66428
Atp4b	-0.23608	-0.28795	-0.25509	-0.46726	-0.36192	0.87677	0.89854	0.89857	0.94852	0.98445	0.98266	0.98925	1	0.99562	0.99644	0.85254	0.89266	0.87946	0.90241	0.87112	0.82085	0.82378	0.81023	0.84013	0.8544	0.8381	0.80686	0.82126	0.86753	0.90306	0.83969	0.87162	0.87132	0.85332	0.83649	0.85336	0.85431	0.84595	0.83747	0.95774	0.90665	0.9133	0.92391	0.91603	0.90694	0.91973	0.92262	0.44027	0.72658
Atp4a	-0.2435	-0.30205	-0.27492	-0.46569	-0.38388	0.8918	0.91014	0.92361	0.95232	0.98771	0.99133	0.99211	0.99562	1	0.99855	0.83905	0.87915	0.87068	0.88397	0.85997	0.80445	0.81748	0.80167	0.83378	0.85599	0.83944	0.81709	0.81903	0.87707	0.90015	0.8371	0.85949	0.88313	0.87684	0.84561	0.86218	0.8693	0.87449	0.87299	0.93792	0.89508	0.91944	0.9289	0.91984	0.90967	0.91313	0.91639	0.4878	0.73564
Clps	-0.24161	-0.30119	-0.27412	-0.46882	-0.38409	0.87126	0.89763	0.91022	0.95341	0.99227	0.99276	0.98699	0.99644	0.99855	1	0.83696	0.88108	0.87381	0.88576	0.86683	0.81213	0.82175	0.80881	0.83693	0.85328	0.84072	0.83032	0.83093	0.87228	0.8967	0.83918	0.85808	0.87844	0.8711	0.84765	0.86318	0.86835	0.8788	0.87307	0.93609	0.89145	0.92712	0.94141	0.926	0.91339	0.91209	0.91882	0.44108	0.75716
Gm3671	0.17776	0.19072	0.18335	-0.12715	-0.07737	0.77006	0.77191	0.72102	0.7799	0.86022	0.81365	0.86146	0.85254	0.83905	0.83696	1	0.9696	0.94585	0.96379	0.94868	0.9541	0.91575	0.89425	0.92407	0.9407	0.93232	0.81583	0.81665	0.78891	0.8902	0.89977	0.92203	0.87995	0.86645	0.88444	0.8399	0.83035	0.74527	0.73145	0.91861	0.9053	0.83411	0.81171	0.928	0.91859	0.91054	0.91591	0.38647	0.45835
Gm10268	0.16267	0.13676	0.15208	-0.15768	-0.11898	0.75268	0.78362	0.7434	0.80964	0.89933	0.87083	0.87933	0.89266	0.87915	0.88108	0.9696	1	0.97309	0.97012	0.95187	0.96741	0.95864	0.9396	0.93291	0.96648	0.94474	0.8509	0.89901	0.85597	0.92591	0.86934	0.91931	0.88068	0.87956	0.88484	0.88668	0.86224	0.79817	0.76884	0.93991	0.93638	0.92025	0.89145	0.94919	0.9305	0.95392	0.96025	0.36252	0.57191
Rps12-ps19	0.15041	0.13651	0.12537	-0.14345	-0.14935	0.73905	0.78355	0.75133	0.79779	0.89752	0.87721	0.8598	0.87946	0.87068	0.87381	0.94585	0.97309	1	0.96723	0.97931	0.97775	0.96981	0.96551	0.95668	0.98475	0.95681	0.86744	0.90627	0.89431	0.9374	0.87863	0.89749	0.89111	0.878	0.88446	0.91706	0.90051	0.82615	0.79439	0.90908	0.92523	0.91396	0.9007	0.94095	0.92134	0.95073	0.98277	0.35649	0.60526
Gm5599	0.11599	0.0805	0.08685	-0.1584	-0.11844	0.77147	0.79999	0.73352	0.8234	0.90125	0.86607	0.89481	0.90241	0.88397	0.88576	0.96379	0.97012	0.96723	1	0.96436	0.94287	0.91487	0.90074	0.92411	0.94351	0.92304	0.84596	0.85007	0.85743	0.94651	0.93231	0.95403	0.91427	0.86311	0.89539	0.89346	0.88762	0.78319	0.75665	0.95517	0.92872	0.86286	0.85654	0.93007	0.87933	0.93458	0.9442	0.34895	0.53921
Gm7695	0.11617	0.10859	0.11293	-0.17791	-0.14449	0.71655	0.75477	0.72508	0.80414	0.90149	0.86038	0.85783	0.87112	0.85997	0.86683	0.94868	0.95187	0.97931	0.96436	1	0.96496	0.92191	0.92083	0.94292	0.95114	0.92654	0.88732	0.86733	0.83941	0.90276	0.91659	0.90271	0.89446	0.8698	0.90179	0.86968	0.88565	0.81672	0.78802	0.90449	0.90644	0.88338	0.88807	0.94338	0.91733	0.91384	0.94846	0.27316	0.59271
Gm8292	0.25673	0.26032	0.22569	-0.08396	-0.05609	0.65817	0.70098	0.66341	0.73619	0.84493	0.80991	0.79536	0.82085	0.80445	0.81213	0.9541	0.96741	0.97775	0.94287	0.96496	1	0.97449	0.95531	0.94259	0.95454	0.95903	0.84805	0.89788	0.81892	0.8837	0.84294	0.86899	0.83062	0.82808	0.85396	0.86969	0.83301	0.76731	0.72946	0.87351	0.90108	0.88367	0.8622	0.92778	0.92451	0.91357	0.95396	0.24616	0.56157
Gm13864	0.2798	0.25743	0.22727	-0.07692	-0.04958	0.66986	0.71805	0.6968	0.73691	0.84928	0.83849	0.79427	0.82378	0.81748	0.82175	0.91575	0.95864	0.96981	0.91487	0.92191	0.97449	1	0.97271	0.95535	0.97017	0.97399	0.86183	0.945	0.87958	0.90793	0.80953	0.84812	0.84117	0.86581	0.8572	0.92735	0.86798	0.82551	0.78937	0.84997	0.88993	0.92488	0.88194	0.92911	0.91273	0.93651	0.96376	0.33635	0.60591
Lor	0.19471	0.22119	0.20488	-0.08625	-0.13071	0.6319	0.70725	0.67863	0.7231	0.83774	0.82511	0.77174	0.81023	0.80167	0.80881	0.89425	0.9396	0.96551	0.90074	0.92083	0.95531	0.97271	1	0.94768	0.96628	0.92269	0.84604	0.93532	0.86851	0.8894	0.7954	0.81699	0.82768	0.84064	0.83024	0.90461	0.86549	0.80745	0.7613	0.83028	0.86385	0.90722	0.8915	0.90255	0.89071	0.9085	0.95617	0.28308	0.6244
Hopxos	0.20493	0.21322	0.23234	-0.15374	-0.01763	0.69142	0.72562	0.70984	0.76333	0.8706	0.85089	0.81929	0.84013	0.83378	0.83693	0.92407	0.93291	0.95668	0.92411	0.94292	0.94259	0.95535	0.94768	1	0.96342	0.93752	0.89155	0.92524	0.88713	0.91725	0.87884	0.87327	0.8936	0.90521	0.9015	0.92453	0.90853	0.85492	0.82386	0.86835	0.88632	0.89701	0.86159	0.92912	0.89254	0.92362	0.94472	0.34975	0.58664
Gm14046	0.19237	0.1872	0.18702	-0.10178	-0.11441	0.74829	0.78391	0.76213	0.77514	0.87789	0.86544	0.84691	0.8544	0.85599	0.85328	0.9407	0.96648	0.98475	0.94351	0.95114	0.95454	0.97017	0.96628	0.96342	1	0.95512	0.86656	0.90989	0.90823	0.93799	0.86712	0.88389	0.90777	0.91755	0.89345	0.92972	0.91817	0.84714	0.82233	0.88446	0.91612	0.91435	0.88299	0.93534	0.90983	0.94557	0.96815	0.45418	0.5674
Gm15441	0.25074	0.21714	0.17198	-0.09499	-0.06396	0.73131	0.757	0.73942	0.77243	0.87318	0.84897	0.83157	0.8381	0.83944	0.84072	0.93232	0.94474	0.95681	0.92304	0.92654	0.95903	0.97399	0.92269	0.93752	0.95512	1	0.87736	0.88933	0.84316	0.89286	0.85557	0.86088	0.86621	0.89001	0.88597	0.92446	0.86967	0.84479	0.83241	0.84491	0.86719	0.90246	0.87088	0.95507	0.92796	0.94331	0.94002	0.38268	0.58276
Ctla4	0.19213	0.06694	0.06563	-0.13299	-0.135	0.60537	0.66758	0.66885	0.77819	0.88408	0.85388	0.7893	0.80686	0.81709	0.83032	0.81583	0.8509	0.86744	0.84596	0.88732	0.84805	0.86183	0.84604	0.89155	0.86656	0.87736	1	0.91751	0.83558	0.86255	0.90931	0.85739	0.91514	0.93191	0.96114	0.91642	0.93031	0.95268	0.92686	0.76466	0.75693	0.90578	0.90583	0.94608	0.84406	0.81573	0.84893	0.19	0.70182
Gm37660	0.22307	0.14244	0.13739	-0.13478	-0.08782	0.58792	0.66629	0.66538	0.74667	0.85896	0.86401	0.77162	0.82126	0.81903	0.83093	0.81665	0.89901	0.90627	0.85007	0.86733	0.89788	0.945	0.93532	0.92524	0.90989	0.88933	0.91751	1	0.91013	0.90324	0.79492	0.82667	0.85021	0.87756	0.87112	0.93783	0.90303	0.89733	0.84409	0.81248	0.84884	0.95534	0.91915	0.91174	0.85958	0.86312	0.92624	0.23536	0.72669
Gm48868	0.07184	-0.04608	-0.05947	-0.19307	-0.21492	0.75952	0.79851	0.79484	0.79323	0.86809	0.90633	0.84712	0.86753	0.87707	0.87228	0.78891	0.85597	0.89431	0.85743	0.83941	0.81892	0.87958	0.86851	0.88713	0.90823	0.84316	0.83558	0.91013	1	0.96924	0.81838	0.8659	0.91391	0.89942	0.86404	0.95395	0.95432	0.8912	0.86032	0.85284	0.87781	0.89741	0.85962	0.85361	0.80095	0.85933	0.92789	0.52649	0.65621
Majin	0.11938	0.00874	-0.00811	-0.15472	-0.16895	0.7929	0.8225	0.7795	0.82519	0.89754	0.90546	0.89246	0.90306	0.90015	0.8967	0.8902	0.92591	0.9374	0.94651	0.90276	0.8837	0.90793	0.8894	0.91725	0.93799	0.89286	0.86255	0.90324	0.96924	1	0.9089	0.95505	0.95722	0.91596	0.9165	0.96078	0.95946	0.86504	0.836	0.92474	0.91947	0.89072	0.86172	0.9053	0.83975	0.89699	0.94752	0.4784	0.59626
Trim30d	0.13228	0.03006	0.02393	-0.12105	-0.13041	0.7334	0.75062	0.6939	0.80094	0.87274	0.8271	0.8543	0.83969	0.8371	0.83918	0.89977	0.86934	0.87863	0.93231	0.91659	0.84294	0.80953	0.7954	0.87884	0.86712	0.85557	0.90931	0.79492	0.81838	0.9089	1	0.95822	0.96753	0.91033	0.9651	0.88118	0.92389	0.84315	0.83236	0.85958	0.80954	0.79291	0.80283	0.91136	0.80608	0.81704	0.83965	0.32126	0.51275
Ubd	0.16451	0.02098	0.01183	-0.12481	-0.14314	0.77398	0.78037	0.7106	0.80654	0.86942	0.84261	0.87681	0.87162	0.85949	0.85808	0.92203	0.91931	0.89749	0.95403	0.90271	0.86899	0.84812	0.81699	0.87327	0.88389	0.86088	0.85739	0.82667	0.8659	0.95505	0.95822	1	0.9522	0.89317	0.94455	0.88656	0.90192	0.79996	0.77879	0.92073	0.8684	0.8206	0.79935	0.89801	0.81895	0.84634	0.87746	0.3852	0.49621
Cxcl9	0.10463	-0.01443	-0.02084	-0.14262	-0.18779	0.79237	0.80928	0.78018	0.82814	0.89822	0.88603	0.88763	0.87132	0.88313	0.87844	0.87995	0.88068	0.89111	0.91427	0.89446	0.83062	0.84117	0.82768	0.8936	0.90777	0.86621	0.91514	0.85021	0.91391	0.95722	0.96753	0.9522	1	0.96924	0.97337	0.93651	0.97864	0.9111	0.90211	0.86983	0.84903	0.85551	0.844	0.92023	0.8262	0.84286	0.87971	0.48191	0.56628
Ifit2	0.13018	0.02765	0.038	-0.16775	-0.17504	0.78325	0.79446	0.80626	0.81863	0.89976	0.89253	0.87135	0.85332	0.87684	0.8711	0.86645	0.87956	0.878	0.86311	0.8698	0.82808	0.86581	0.84064	0.90521	0.91755	0.89001	0.93191	0.87756	0.89942	0.91596	0.91033	0.89317	0.96924	1	0.96907	0.93167	0.95768	0.95162	0.95148	0.82519	0.82385	0.90161	0.86966	0.94065	0.86993	0.86153	0.87433	0.51965	0.60285
Mx1	0.19841	0.05239	0.04807	-0.11859	-0.15086	0.7246	0.7441	0.7225	0.80092	0.88694	0.85739	0.845	0.83649	0.84561	0.84765	0.88444	0.88484	0.88446	0.89539	0.90179	0.85396	0.8572	0.83024	0.9015	0.89345	0.88597	0.96114	0.87112	0.86404	0.9165	0.9651	0.94455	0.97337	0.96907	1	0.9196	0.94654	0.91979	0.9085	0.82847	0.79607	0.8688	0.85191	0.94282	0.84809	0.83348	0.85759	0.35716	0.58284
Gm45053	0.18944	0.07851	0.03904	-0.10055	-0.13392	0.71932	0.77191	0.74928	0.79073	0.88255	0.89183	0.8354	0.85336	0.86218	0.86318	0.8399	0.88668	0.91706	0.89346	0.86968	0.86969	0.92735	0.90461	0.92453	0.92972	0.92446	0.91642	0.93783	0.95395	0.96078	0.88118	0.88656	0.93651	0.93167	0.9196	1	0.97008	0.92938	0.90375	0.82888	0.84032	0.91123	0.8851	0.92131	0.83465	0.88857	0.92548	0.42114	0.66071
Ido1	0.11793	0.00799	-0.00648	-0.12954	-0.17933	0.73342	0.779	0.76473	0.80492	0.89029	0.89493	0.85076	0.85431	0.8693	0.86835	0.83035	0.86224	0.90051	0.88762	0.88565	0.83301	0.86798	0.86549	0.90853	0.91817	0.86967	0.93031	0.90303	0.95432	0.95946	0.92389	0.90192	0.97864	0.95768	0.94654	0.97008	1	0.9441	0.92199	0.83398	0.84493	0.88748	0.87622	0.91036	0.81361	0.84399	0.90143	0.44496	0.64104
Cxcl10	0.02491	-0.10112	-0.10352	-0.25375	-0.25652	0.70414	0.75316	0.79627	0.82739	0.90982	0.91755	0.83765	0.84595	0.87449	0.8788	0.74527	0.79817	0.82615	0.78319	0.81672	0.76731	0.82551	0.80745	0.85492	0.84714	0.84479	0.95268	0.89733	0.8912	0.86504	0.84315	0.79996	0.9111	0.95162	0.91979	0.92938	0.9441	1	0.99181	0.75098	0.75554	0.92486	0.91883	0.91965	0.84083	0.81789	0.84876	0.38924	0.76521
Cxcl11	-0.01385	-0.13844	-0.14262	-0.2766	-0.28029	0.74117	0.77162	0.8246	0.8311	0.90236	0.90926	0.8447	0.83747	0.87299	0.87307	0.73145	0.76884	0.79439	0.75665	0.78802	0.72946	0.78937	0.7613	0.82386	0.82233	0.83241	0.92686	0.84409	0.86032	0.836	0.83236	0.77879	0.90211	0.95148	0.9085	0.90375	0.92199	0.99181	1	0.72887	0.72579	0.89622	0.89091	0.90688	0.83373	0.80508	0.81651	0.45375	0.73489
Gm13904	-0.07953	-0.10577	-0.06249	-0.34601	-0.19646	0.83913	0.8469	0.8077	0.87842	0.92402	0.90904	0.94981	0.95774	0.93792	0.93609	0.91861	0.93991	0.90908	0.95517	0.90449	0.87351	0.84997	0.83028	0.86835	0.88446	0.84491	0.76466	0.81248	0.85284	0.92474	0.85958	0.92073	0.86983	0.82519	0.82847	0.82888	0.83398	0.75098	0.72887	1	0.96426	0.86576	0.85172	0.89033	0.87939	0.91935	0.92932	0.42907	0.57668
Gm8662	0.02112	0.0327	0.04968	-0.26317	-0.10694	0.78678	0.80122	0.78324	0.8178	0.88287	0.88225	0.89599	0.90665	0.89508	0.89145	0.9053	0.93638	0.92523	0.92872	0.90644	0.90108	0.88993	0.86385	0.88632	0.91612	0.86719	0.75693	0.84884	0.87781	0.91947	0.80954	0.8684	0.84903	0.82385	0.79607	0.84032	0.84493	0.75554	0.72579	0.96426	1	0.87903	0.84655	0.8779	0.88442	0.90739	0.95193	0.46373	0.56546
Gm13665	0.02012	-0.04832	-0.02209	-0.30347	-0.24129	0.72203	0.78072	0.80906	0.85592	0.94548	0.94862	0.88115	0.9133	0.91944	0.92712	0.83411	0.92025	0.91396	0.86286	0.88338	0.88367	0.92488	0.90722	0.89701	0.91435	0.90246	0.90578	0.95534	0.89741	0.89072	0.79291	0.8206	0.85551	0.90161	0.8688	0.91123	0.88748	0.92486	0.89622	0.86576	0.87903	1	0.97976	0.95301	0.93182	0.92592	0.94488	0.34151	0.78695
Gm15289	-0.09576	-0.14544	-0.12997	-0.34688	-0.34487	0.71177	0.78958	0.81291	0.88001	0.96203	0.95512	0.88903	0.92391	0.9289	0.94141	0.81171	0.89145	0.9007	0.85654	0.88807	0.8622	0.88194	0.8915	0.86159	0.88299	0.87088	0.90583	0.91915	0.85962	0.86172	0.80283	0.79935	0.844	0.86966	0.85191	0.8851	0.87622	0.91883	0.89091	0.85172	0.84655	0.97976	1	0.9489	0.9264	0.89944	0.92882	0.26065	0.83238
Gm8724	0.0817	0.02701	0.02355	-0.2352	-0.19271	0.76521	0.80183	0.79957	0.87126	0.95833	0.92753	0.90935	0.91603	0.91984	0.926	0.928	0.94919	0.94095	0.93007	0.94338	0.92778	0.92911	0.90255	0.92912	0.93534	0.95507	0.94608	0.91174	0.85361	0.9053	0.91136	0.89801	0.92023	0.94065	0.94282	0.92131	0.91036	0.91965	0.90688	0.89033	0.8779	0.95301	0.9489	1	0.95952	0.93175	0.93776	0.33232	0.69268
Chga	-0.01821	-0.00451	-0.0214	-0.3243	-0.2642	0.78944	0.81002	0.8345	0.85794	0.93348	0.91026	0.89933	0.90694	0.90967	0.91339	0.91859	0.9305	0.92134	0.87933	0.91733	0.92451	0.91273	0.89071	0.89254	0.90983	0.92796	0.84406	0.85958	0.80095	0.83975	0.80608	0.81895	0.8262	0.86993	0.84809	0.83465	0.81361	0.84083	0.83373	0.87939	0.88442	0.93182	0.9264	0.95952	1	0.91907	0.93754	0.36957	0.68265
Gm7613	0.0272	0.02619	0.07234	-0.28316	-0.1539	0.8045	0.82924	0.81785	0.84407	0.92361	0.90948	0.90571	0.91973	0.91313	0.91209	0.91054	0.95392	0.95073	0.93458	0.91384	0.91357	0.93651	0.9085	0.92362	0.94557	0.94331	0.81573	0.86312	0.85933	0.89699	0.81704	0.84634	0.84286	0.86153	0.83348	0.88857	0.84399	0.81789	0.80508	0.91935	0.90739	0.92592	0.89944	0.93175	0.91907	1	0.95372	0.44387	0.62747
Gm8318	0.05086	0.03723	0.02171	-0.23905	-0.20403	0.77612	0.82125	0.80903	0.84043	0.92662	0.92677	0.89585	0.92262	0.91639	0.91882	0.91591	0.96025	0.98277	0.9442	0.94846	0.95396	0.96376	0.95617	0.94472	0.96815	0.94002	0.84893	0.92624	0.92789	0.94752	0.83965	0.87746	0.87971	0.87433	0.85759	0.92548	0.90143	0.84876	0.81651	0.92932	0.95193	0.94488	0.92882	0.93776	0.93754	0.95372	1	0.40239	0.67764
Gm14048	-0.12834	-0.14627	-0.14513	-0.16214	-0.18798	0.72535	0.61768	0.66177	0.41689	0.38753	0.45732	0.52557	0.44027	0.4878	0.44108	0.38647	0.36252	0.35649	0.34895	0.27316	0.24616	0.33635	0.28308	0.34975	0.45418	0.38268	0.19	0.23536	0.52649	0.4784	0.32126	0.3852	0.48191	0.51965	0.35716	0.42114	0.44496	0.38924	0.45375	0.42907	0.46373	0.34151	0.26065	0.33232	0.36957	0.44387	0.40239	1	0.05949
DG 34:4	-0.28259	-0.35746	-0.35235	-0.57505	-0.53439	0.52852	0.6368	0.66397	0.76306	0.76594	0.78781	0.66428	0.72658	0.73564	0.75716	0.45835	0.57191	0.60526	0.53921	0.59271	0.56157	0.60591	0.6244	0.58664	0.5674	0.58276	0.70182	0.72669	0.65621	0.59626	0.51275	0.49621	0.56628	0.60285	0.58284	0.66071	0.64104	0.76521	0.73489	0.57668	0.56546	0.78695	0.83238	0.69268	0.68265	0.62747	0.67764	0.05949	1
Phe-Gly-Gly	-0.25735	-0.29742	-0.28809	-0.53368	-0.43677	0.69743	0.74635	0.69542	0.81215	0.71362	0.72238	0.71074	0.71443	0.72435	0.72679	0.53087	0.58162	0.56846	0.58013	0.57161	0.52644	0.53375	0.50469	0.52115	0.55075	0.56181	0.57137	0.56769	0.58824	0.59415	0.545	0.54671	0.5873	0.58729	0.5478	0.57705	0.59207	0.63279	0.63282	0.64941	0.64947	0.66689	0.68715	0.64655	0.64115	0.60965	0.62673	0.30633	0.79569
PG 18:0_22:6	-0.25358	-0.25494	-0.19086	-0.5946	-0.34403	0.71588	0.67309	0.67439	0.70007	0.65097	0.64324	0.7064	0.67517	0.68288	0.6731	0.55735	0.58955	0.53171	0.56414	0.5419	0.49928	0.47914	0.40742	0.43945	0.52195	0.53694	0.42259	0.41573	0.46523	0.50666	0.46499	0.50319	0.49708	0.51633	0.45567	0.43031	0.45011	0.47563	0.50153	0.66536	0.66768	0.59087	0.58055	0.58817	0.6294	0.6271	0.5684	0.44688	0.52357
Thymidine 3',5'-cy	-0.41022	-0.41294	-0.41559	-0.55537	-0.71711	0.69857	0.75061	0.72377	0.75425	0.68581	0.6793	0.6927	0.71496	0.70269	0.71054	0.53672	0.58098	0.55877	0.57623	0.55132	0.52212	0.49557	0.52864	0.45643	0.50621	0.49828	0.45977	0.48782	0.49669	0.53601	0.48203	0.5246	0.48931	0.46309	0.46295	0.48288	0.47	0.49126	0.4833	0.64605	0.57125	0.60424	0.66768	0.59085	0.6384	0.59222	0.60728	0.18056	0.70325
Decatrienoylcarnit	-0.36177	-0.36764	-0.3614	-0.49791	-0.57972	0.88957	0.90139	0.87871	0.88775	0.74841	0.74608	0.7995	0.77522	0.78253	0.77301	0.6493	0.64545	0.62721	0.64942	0.62076	0.56618	0.55313	0.55138	0.55452	0.61382	0.60048	0.51245	0.4914	0.59131	0.62951	0.59772	0.62479	0.62964	0.62363	0.58488	0.56631	0.57855	0.58385	0.61063	0.7169	0.65171	0.63571	0.66417	0.66614	0.71255	0.68244	0.66282	0.49361	0.59272
PG 20:4_22:6	-0.29964	-0.32737	-0.31487	-0.54326	-0.55114	0.86398	0.86166	0.84346	0.81871	0.74604	0.76398	0.79961	0.77596	0.79191	0.77921	0.62797	0.67095	0.6256	0.62775	0.59148	0.56991	0.58768	0.55469	0.53208	0.63199	0.61907	0.50438	0.53965	0.62326	0.63674	0.53016	0.59601	0.61021	0.63737	0.55723	0.57809	0.57704	0.60371	0.62687	0.72347	0.70806	0.69843	0.69446	0.67341	0.72787	0.70304	0.68238	0.57004	0.63353
SHexCer 38:5;3O	-0.2957	-0.32042	-0.30687	-0.53906	-0.52529	0.8617	0.85674	0.84439	0.82305	0.75015	0.76676	0.80512	0.78079	0.79623	0.78376	0.63486	0.67667	0.62364	0.63028	0.59197	0.57353	0.58947	0.55239	0.53371	0.63103	0.62111	0.50795	0.54515	0.61984	0.63734	0.53256	0.60005	0.61195	0.64078	0.5596	0.5766	0.57609	0.60513	0.62788	0.7321	0.71935	0.70357	0.69723	0.67991	0.73512	0.70279	0.68338	0.56643	0.62001
Inosine 5'-monopho	-0.37127	-0.35686	-0.37392	-0.46303	-0.67101	0.79513	0.83704	0.87073	0.76635	0.74469	0.76248	0.75784	0.76639	0.77364	0.77101	0.60012	0.64868	0.65087	0.61958	0.6083	0.5906	0.60549	0.63165	0.55606	0.63309	0.6095	0.51306	0.56811	0.62728	0.62397	0.51141	0.55479	0.57453	0.58647	0.52907	0.59595	0.57548	0.6022	0.60747	0.68022	0.64743	0.69601	0.73325	0.66086	0.72709	0.69472	0.70614	0.41457	0.66569
PG 22:6_22:6	-0.3785	-0.417	-0.41223	-0.58367	-0.70335	0.84324	0.86947	0.8643	0.78153	0.72567	0.754	0.75688	0.74723	0.76526	0.75583	0.5538	0.59818	0.59532	0.56734	0.55952	0.52043	0.54795	0.5421	0.51689	0.59068	0.5709	0.49118	0.51717	0.62317	0.60222	0.49374	0.54245	0.57514	0.60358	0.53307	0.56504	0.56244	0.60989	0.63234	0.65167	0.61544	0.66791	0.68188	0.62781	0.69044	0.66298	0.65475	0.52336	0.72243
[truncated: 8 more columns]
